# Supplementary material for: Regioselective Zn(OAc)2-catalyzed azide–alkyne cycloaddition in water: the green click-chemistry
Source: Royal Society of Chemistry journal article supplement (doi:10.1039/c6qo00787b), 2017-01-01
Supplement: c6qo00787b1.pdf [file c6qo00787b1.pdf]

## Supporting Information

### Regioselective Zn(OAc)<sub>2</sub>-catalyzed azide-alkyne cycloaddition in water: the green click-chemistry

**Maria A. Morozova<sup>a</sup>, Mekhman S. Yusubov<sup>b</sup>, Bohumil Kratochvil<sup>c,d</sup>, Václav Eigner<sup>d</sup>, Alexander A. Bondarev<sup>e</sup>, Akira Yoshimura<sup>b,f</sup>, Akio Saito<sup>g</sup>, Viktor V. Zhdankin<sup>b,f</sup>, Marina E. Trusova<sup>a\*</sup> and Pavel S. Postnikov<sup>b\*</sup>**

<sup>a</sup>Department of Biotechnology and Organic Chemistry, National Research Tomsk Polytechnic University, 43 Lenin ave., 634050 Tomsk, Russia

<sup>b</sup>Department of Technology of Organic Substances and Polymer Materials, National Research Tomsk Polytechnic University, 43 Lenin ave., 634050 Tomsk, Russia

<sup>c</sup>Department of Physical and Analytical Chemistry, National Research Tomsk Polytechnic University, 43 Lenin ave., 634050 Tomsk, Russia

<sup>d</sup>Department of Solid State Chemistry, University of Chemistry and Technology, Prague, Technická 5, 166 28, Czech Republic

<sup>e</sup> Department of Biomedicine, Altai State University, Lenina av. 61, 656049, Russia, Barnaul

<sup>f</sup>Department of Chemistry and Biochemistry, University of Minnesota Duluth, Duluth, MN 55812, USA

<sup>g</sup>Division of Applied Chemistry Institute of Engineering Tokyo University of Agriculture and Technology Koganei, Tokyo 184-8588, Japan

Corresponding authors: [Postnikov@tpu.ru](mailto:Postnikov@tpu.ru)

[trusova@tpu.ru](mailto:trusova@tpu.ru)

| Table of Contents                                                                                                                                                       | pp |
|-------------------------------------------------------------------------------------------------------------------------------------------------------------------------|----|
| General experimental remarks                                                                                                                                            |    |
| General Procedure for Preparation 1,4-disubstituted-1,2,3-triazoles from azides ( <b>1a-l</b> ) and terminal alkynes ( <b>2a-d</b> )                                    |    |
| General Procedure for Preparation 1,4-disubstituted-1,2,3-triazoles from arenediazoniumtosylates ( <b>4a-e</b> ) and phenylacetylene ( <b>2a</b> ).                     |    |
| General Procedure for Preparation 1,4,5-trisubstituted-1,2,3-triazoles from aromatic azides ( <b>1a, 1d, 1g, 1e, 1m</b> ) and disubstituted acetylenes ( <b>2e-j</b> ). |    |
| General Procedure for Preparation Intermediate ( <b>Iia</b> )                                                                                                           |    |
| Spectra of products                                                                                                                                                     |    |
| References                                                                                                                                                              |    |

## 1. General experimental remarks

$^1\text{H}$  NMR spectra were recorded on a BRUKER 300 (300 MHz) or a BRUKER AM 400 (400 MHz) spectrometer. Chemical shifts are given in parts per million ( $\delta$ /ppm), referenced to dimethylsulfoxide (2.51) as internal standards. All coupling constants are absolute values and are expressed in Hertz (Hz). The description of signals include: s = singlet, d = doublet, t = triplet, dd = doublet of doublets, dt doublet of triplets, m = multiplet.  $^{13}\text{C}$  NMR spectra were recorded on Bruker 300 (75 MHz) and Bruker AM 400 (100 MHz) spectrometers. High Resolution mass-spectra were recorded on Agilent 1260 Infinity LC/6530 QTOF LC/MS with ESI ionization (column Zorbax Eclipse Plus C18 Rapid Resolution HD 2.1x50mm 1.8-Micron). GC-MS measurements were obtained with an Agilent 7890/5975C instrument. The molecular fragments are quoted as the relation between mass and charge ( $m/z$ ), the intensities as a percentage value relative to the intensity of the base signal (100 %). Routine monitoring of reactions were performed using silica gel coated aluminium plates (Merck, silica gel 60, F254) which were analyzed under UV-light at 254 nm and dipped into a solution of 2-naphthol (5 % naphthol in 10 % NaOH aqueous, dipping solution). Solvent mixtures are understood as volume/volume. Solvents, reagents and chemicals were purchased from Sigma/Aldrich. Solvents, reagents and chemicals were used as purchased unless stated otherwise. *Trimethyl(phenylethynyl)silane* **5c** was prepared according to the reported procedure [1], *hex-1-yn-1-yltriisopropylsilane* **5f**, *triisopropyl(phenylethynyl)silane* **5d** were prepared according to the reported procedure [2], *1-methyl-3-((trimethylsilyl)ethynyl)indole* **5e** was prepared according to the reported procedure [3], *arene diazonium tosylates* **4a-4e** were prepared according to the reported procedure [4], *azides* **1a-1m** were prepared according to the reported procedure [5].

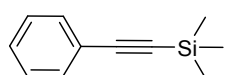

**Trimethyl(phenylethynyl)silane 5c<sup>1</sup>**. Yield 87 %, yellow oil.  $^1\text{H}$ NMR (300 MHz, DMSO- $d_6$ ):  $\delta$  7.46-7.43 (m, 2H), 7.40-7.34 (m, 3H), 0.22 (s, 9H).

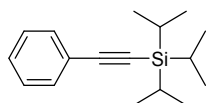

**Triisopropyl(phenylethynyl)silane 5d<sup>2</sup>**. Yield 97 %, yellow oil.  $^1\text{H}$  NMR (400 MHz, DMSO- $d_6$ ):  $\delta$  7.45-7.43 (m, 2H), 7.39-7.34 (m, 3H), 1.20 (m, 3H), 0.98 (m, 18H).

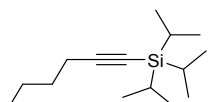

**Hex-1-yn-1-yltriisopropylsilane 5f<sup>2</sup>**. Yield 97 %, yellow oil.  $^1\text{H}$  NMR (400 MHz, DMSO- $d_6$ ):  $\delta$  2.89-2.85 (m, 2H), 1.50-1.43 (m, 3H), 1.14-1.05 (m, 20H), 0.99-0.94 (m, 2H), 0.70-0.67 (m, 3H).

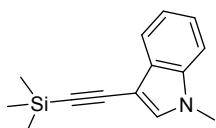

**3-((trimethylsilyl)ethynyl)indole 5e<sup>3</sup>**. Yield 65 %, yellow oil.  $^1\text{H}$  NMR (400 MHz, DMSO- $d_6$ ):  $\delta$  7.94 (s, 1H), 7.83-7.80 (m, 2H), 7.51-7.48 (m, 1H), 7.44-7.39 (m, 1H), 4.02 (s, 3H), 0.51 (s, 9H);

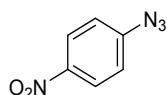

**1-Azido-4-nitrobenzene 1a<sup>5</sup>.** Yield 98 %, pale yellow solid, m.p. = 72–74 °C (lit.<sup>5</sup>, m.p. 72–73 °C).

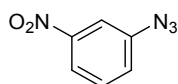

**1-Azido-3-nitrobenzene 1b<sup>5</sup>.** Yield 93 %, orange solid, m.p. = 51–52 °C (lit.<sup>5</sup>, m.p. 52–53 °C).

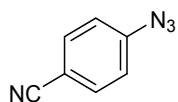

**4-Azidobenzonitrile 1c<sup>5</sup>.** Yield 97 %, white solid, m.p. = 66–67 °C (lit.<sup>5</sup>, m.p. 66–67 °C).

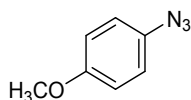

**1-Azido-4-methoxybenzene 1d<sup>5</sup>.** Yield 95 %, yellow oil. <sup>1</sup>H NMR (300 MHz, DMSO-d<sub>6</sub>): δ 7.05 (d, *J* = 9.3 Hz, 2H), 6.98 (d, *J* = 9.0 Hz, 2H), 3.39 (s, 3H).

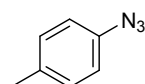

**1-Azido-4-methylbenzene 1f<sup>5</sup>.** Yield 72 %, brown oil. <sup>1</sup>H NMR (300 MHz, DMSO-d<sub>6</sub>): δ 7.22 (d, *J* = 8.4 Hz, 2H), 7.00 (d, *J* = 8.4 Hz, 2H), 2.28 (s, 3H).

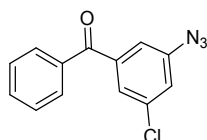

**(3-Azido-5-chlorophenyl)phenylmethanone 1h<sup>5</sup>.** Yield 98 %, beige solid, m.p. = 80–82 °C (lit.<sup>5</sup>, m.p. 81–82 °C).

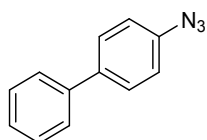

**4-Azidobiphenyl 1k<sup>5</sup>.** Yield 63 %, pale brown solid, m.p. = 72–73 °C (lit.<sup>5</sup>, m.p. 72–73 °C).

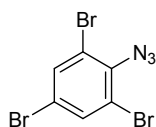

**2-Azido-1,3,5-tribromobenzene 1i<sup>5</sup>.** Yield 93 %, beige solid, m.p. = 82–84 °C (lit.<sup>5</sup>, m.p. 83–84 °C).

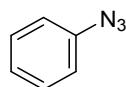

**Azidobenzene 1n<sup>5</sup>.** Yield 67 %, pale yellow oil. <sup>1</sup>H NMR (300 MHz, DMSO-d<sub>6</sub>): δ 7.39 (m, 2H), 7.17 (m, 1H), 7.07 (d, *J* = 7.8 Hz, 2H).

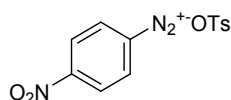

**4-nitrobenzenediazoniumtosylate 4a<sup>4</sup>.** Yield 84 %, yellow solid, m.p. = 133–134 °C (lit.<sup>4</sup>, m.p. 132–133 °C).

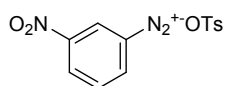

**3-nitrobenzenediazoniumtosylate 4b<sup>4</sup>.** Yield 85 %, yellow solid, m.p. = 133–134 °C (lit.<sup>4</sup>, m.p. 133–134 °C).

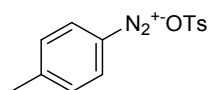

**4-methylbenzenediazoniumtosylate 4c<sup>4</sup>.** Yield 87 %, beige solid, m.p. = 95–97 °C (lit.<sup>4</sup>, m.p. 96–97 °C).

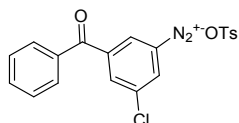

**(3-diazo-5-chlorophenyl)(phenyl)methanonetosylate 4d<sup>4</sup>.** Yield 85 %, beige solid, m.p. = 125–127 °C (lit.<sup>4</sup>, m.p. 126–127 °C).

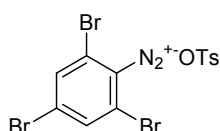

**2,4,6-tribromobenzenediazoniumtosylate 4e<sup>4</sup>.** Yield 58 %, m.p. = 151–152 °C

(lit.<sup>4</sup>, m.p. 152–153 °C).

**Procedure for the AAC between 1-azido-4-nitrobenzene **1a** and phenylacetylene **2a** without catalyst.**

The mixture of 1-azido-4-nitrobenzene **1a** (0.5 mmol, 0.082 g) and phenylacetylene **2a** (0.5 mmol, 0.051 g, 55  $\mu$ l) in water (10 ml) was vigorously stirred during 2–3 minutes. The reaction vessel was then placed to microwave reactor ( $t = 75$  °C and  $P = 80$  B) and heated during 6 hours (TLC, hexane:EtOAc = 7:3). After the reaction mixture was extracted with  $\text{CH}_2\text{Cl}_2$  (3 $\times$ 20 mL), washed by water, brine and dried with anhydrous  $\text{Na}_2\text{SO}_4$ . The solvent was removed in vacuo to give the reaction mass which were purified by column chromatography (silica gel, eluent hexane:EtOAc = 9:1).

**1-(4-nitrophenyl)-5-phenyl-1*H*-1,2,3-triazole.**  $^1\text{H}$  NMR (400 MHz,  $\text{DMSO-d}_6$ ):  $\delta$  8.37 (d,  $J = 9$  Hz, 2H), 8.19 (s, 1H), 7.71 (d,  $J = 9$  Hz, 2H), 7.46-7.42 (m, 3H), 7.35-7.32 (m, 2H);

**1-(4-nitrophenyl)-4-phenyl-1*H*-1,2,3-triazole.**  $^1\text{H}$  NMR (400 MHz,  $\text{DMSO-d}_6$ ):  $\delta$  9.55 (s, 1H), 8.52 (d,  $J = 8$  Hz, 2H), 8.28 (d,  $J = 8$  Hz, 2H), 7.97 (d,  $J = 8$  Hz, 2H), 7.55-7.51 (m, 3H).

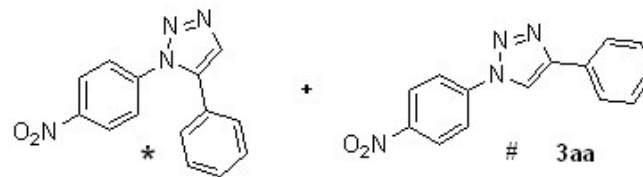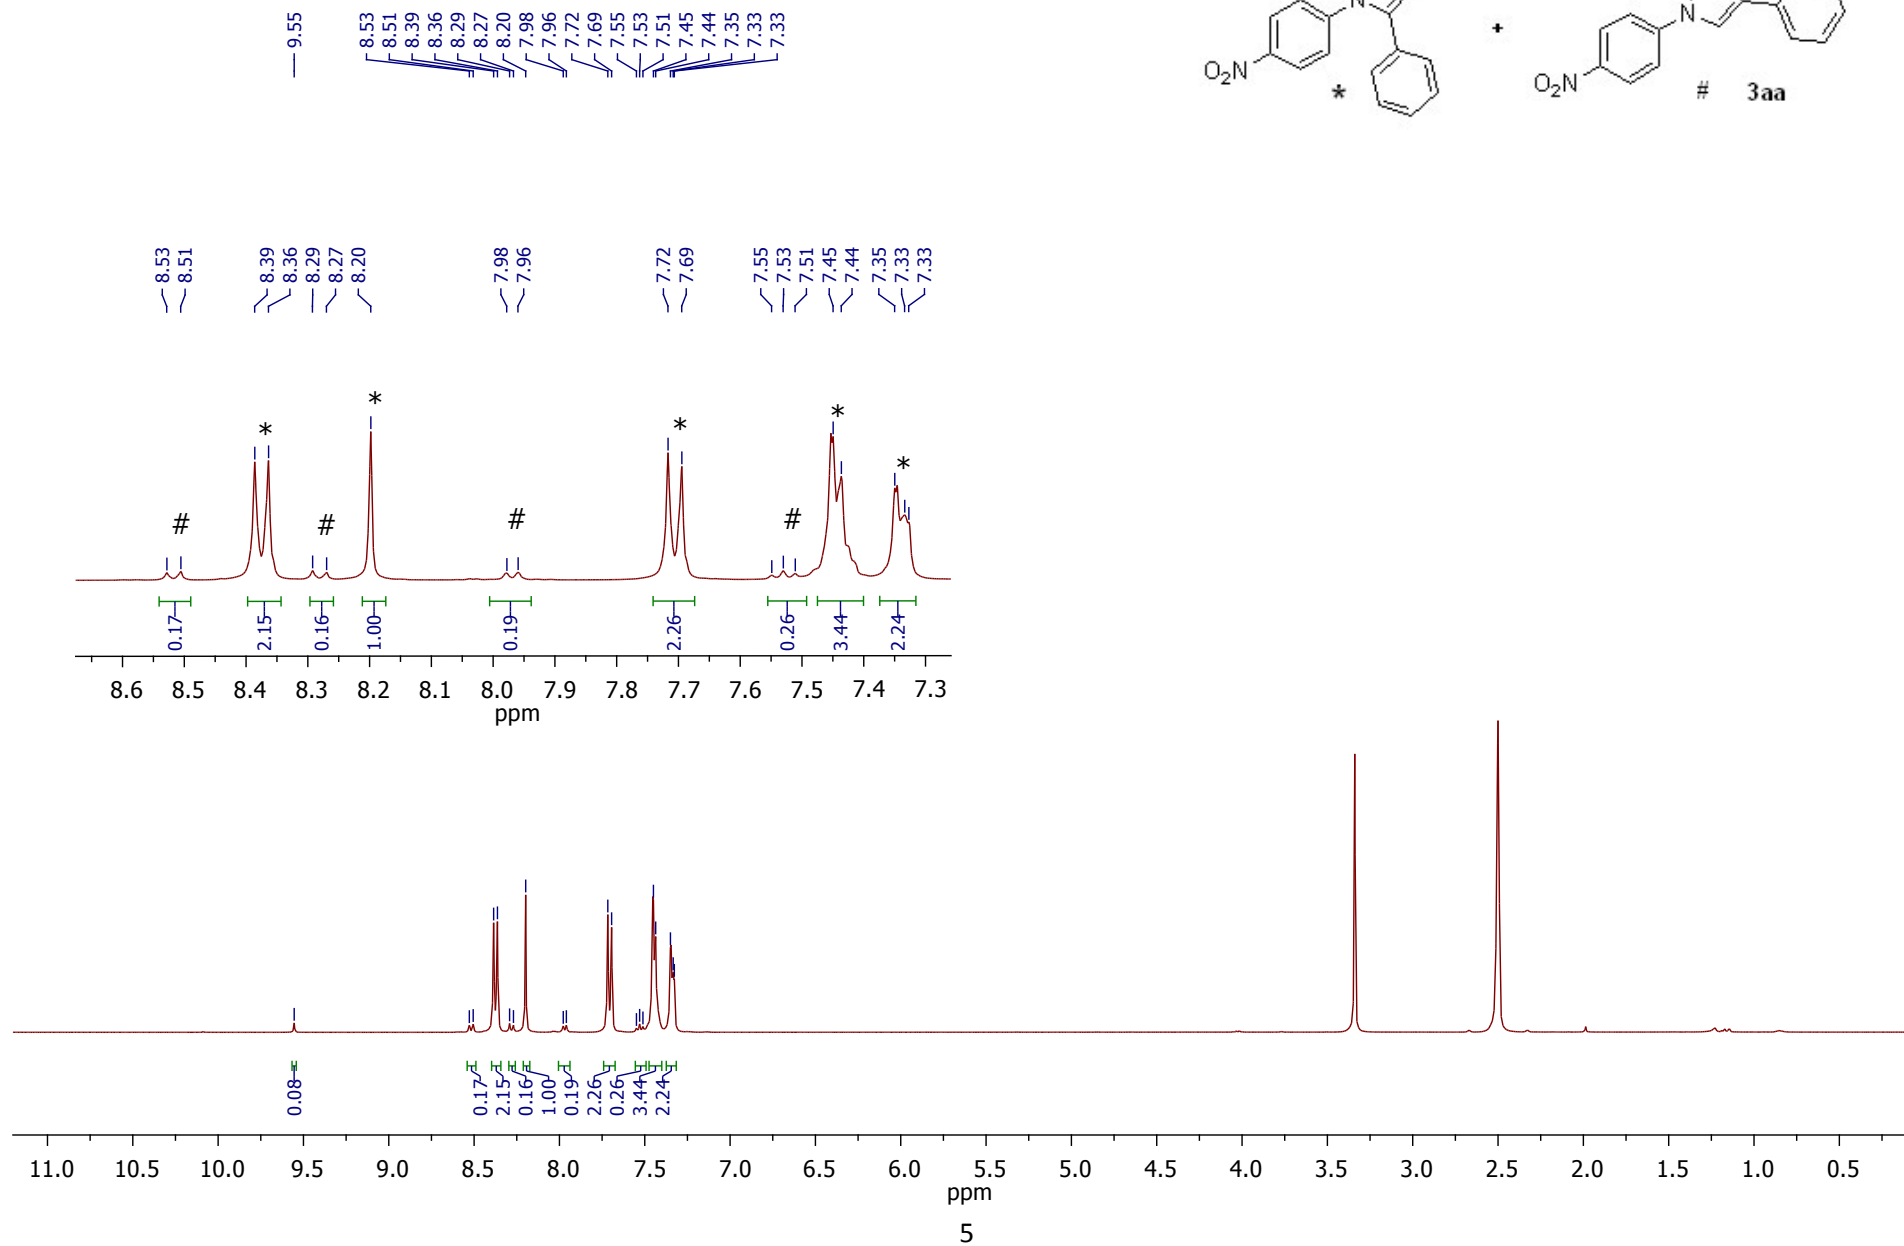

## General Procedure for Preparation 1,4-disubstituted-1,2,3-triazoles from azides (1a-m) and terminal alkynes (2a-d).

The mixture of azide (**1a-m**) (0.5 mmol) and alkyne (**2a-d**) in water (10 ml) was vigorously stirred during 2–3 minutes. After the 10 mol %  $\text{Zn}(\text{OAc})_2$  (0.05 mmol, 0.011 g) and 20 mol % ascorbic acid (0.10 mmol, 0.017 g) were added to reaction mixture. The reaction vessel was placed to microwave reactor ( $t = 75^\circ\text{C}$  and  $P = 80\text{ B}$ ) and heated until full conversion of starting materials and intermediate (TLC, hexane:EtOAc = 7:3). After completing reaction, the reaction mixture was extracted with  $\text{CH}_2\text{Cl}_2$  (3×20 mL), washed by water, brine and dried with anhydrous  $\text{Na}_2\text{SO}_4$ . The solvent was removed in vacuo to give the crude 1,4-disubstitutions-1,2,3-triazoles (**3aa-ma**, **3ab**, **3ac**, **3dc**, **3ad**, **3fd**) which were purified by column chromatography (silica gel, eluent hexane:EtOAc = 9:1).

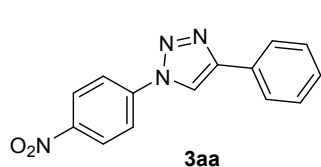

### 1-(4-nitrophenyl)-4-phenyl-1H-1,2,3-triazole (**3aa**).

The reaction 1-azido-4-nitrobenzene **1a** (0.5 mmol, 0.082 g) and phenylacetylene **2a** (0.5 mmol, 0.051 g, 55  $\mu\text{l}$ ) according to the general procedure during 6 hours afforded 1-(4-nitrophenyl)-4-phenyl-1H-1,2,3-triazole **3aa** 0.129 g (yield 97 %) as a light yellow solid. m.p. = 151–152  $^\circ\text{C}$  (lit.<sup>6</sup>, m.p. 152–154  $^\circ\text{C}$ ).  $^1\text{H}$  NMR (400 MHz,  $\text{DMSO}-d_6$ ):  $\delta$  9.55 (s, 1H), 8.52 (d,  $J = 8\text{ Hz}$ , 2H), 8.28 (d,  $J = 8\text{ Hz}$ , 2H), 7.97 (d,  $J = 8\text{ Hz}$ , 2H), 7.55–7.51 (m, 3H);  $^{13}\text{C}$  NMR (100 MHz,  $\text{CDCl}_3$ ):  $\delta$  147.50, 140.99, 138.11, 133.91, 129.66, 129.10, 128.76, 126.47, 125.86, 125.06. HRMS (ESI-positive mode): calcd for  $\text{C}_{14}\text{H}_{11}\text{N}_4\text{O}_2$  ( $[\text{M}] + \text{H}^+$ ) = 267.0882; Found 267.0870.

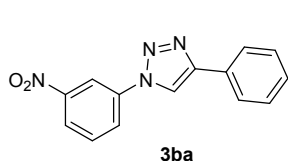

### 1-(3-nitrophenyl)-4-phenyl-1H-1,2,3-triazole (**3ba**).

The reaction 1-azido-3-nitrobenzene **1b** (0.5 mmol, 0.082 g) and phenylacetylene **2a** (0.5 mmol, 0.051 g, 55  $\mu\text{l}$ ) according to the general procedure during 7 hours afforded 1-(3-nitrophenyl)-4-phenyl-1H-1,2,3-triazole **3ba** 0.125 g (yield 94 %) as a light yellow solid. m.p = 191–192  $^\circ\text{C}$  (lit.<sup>6</sup>, m.p. 192–194  $^\circ\text{C}$ ).  $^1\text{H}$  NMR (400 MHz,  $\text{DMSO}-d_6$ ):  $\delta$  8.39 (d,  $J = 7.6\text{ Hz}$ , 1H), 8.32 (s, 1H), 8.19 (s, 1H), 7.85–7.79 (m, 2H), 7.44–7.42 (m, 3H), 7.36–7.34 (m, 2H);  $^{13}\text{C}$  NMR (100 MHz,  $\text{DMSO}-d_6$ ):  $\delta$  148.09, 138.04, 136.91, 133.59, 131.76, 131.14, 129.59, 129.02, 128.78, 125.85, 124.27, 120.47.

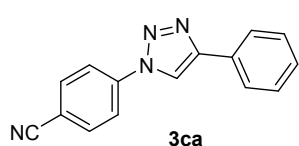

### 4-(4-phenyl-1H-1,2,3-triazol-1-yl)benzonitrile (**3ca**).

The reaction 4-azidobenzonitrile **1c** (0.5 mmol, 0.072 g) and phenylacetylene **2a** (0.5 mmol, 0.051 g, 55  $\mu\text{l}$ ) according to the general procedure during 7 hours afforded 4-(4-phenyl-1H-1,2,3-triazol-1-yl)benzonitrile **3ca** 0.113 g (yield 92 %) as a light beige

solid. m.p = 220–222 °C (lit.<sup>7</sup>, m.p. 220–221 °C). <sup>1</sup>H NMR (400 MHz, DMSO-d<sub>6</sub>): δ 8.17 (s, 1H), 8.03 (d, *J* = 8.8 Hz, 2H), 7.63 (d, *J* = 8.4 Hz, 2H), 7.44–7.43 (m, 3H), 7.32–7.29 (m, 2H); <sup>13</sup>C NMR (100 MHz, CDCl<sub>3</sub>): δ 139.64, 137.89, 133.83, 129.56, 129.02, 128.69, 126.23, 125.90, 120.36, 117.98, 112.19.

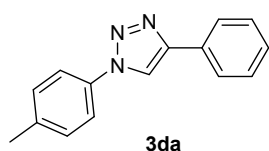

#### 4-phenyl-1-(p-tolyl)-1*H*-1,2,3-triazole (**3da**).

The reaction 1-azido-4-methylbenzene **1d** (0.5 mmol, 0.067 g) and phenylacetylene **2a** (0.5 mmol, 0.051 g, 55 μl) according to the general procedure during 9 hours afforded 4-phenyl-1-(p-tolyl)-1*H*-1,2,3-triazole **3da** 0.105 g (yield 90 %) as a light beige solid. m.p. = 163–164 °C (lit.<sup>6</sup>, m.p. 165–167 °C). <sup>1</sup>H NMR (400 MHz, DMSO-d<sub>6</sub>): δ 9.26 (s, 1H), 7.95 (d, *J* = 7.2 Hz, 2H), 7.84 (d, *J* = 8.4 Hz, 2H), 7.49 (t, *J* = 7.6 Hz, 2H), 7.44–7.36 (m, 3H), 2.39 (s, 3H); <sup>13</sup>C NMR (100 MHz, DMSO-d<sub>6</sub>): δ 147.23, 138.36, 134.43, 130.34, 130.29, 129.01, 128.21, 125.33, 119.89, 119.52, 20.65.

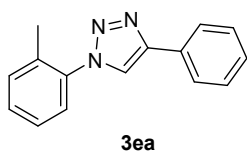

#### 4-phenyl-1-(o-tolyl)-1*H*-1,2,3-triazole (**3ea**).

The reaction 1-azido-2-methylbenzene **1e** (0.5 mmol, 0.067 g) and phenylacetylene **2a** (0.5 mmol, 0.051 g, 55 μl) according to the general procedure during 7 hours afforded 4-phenyl-1-(p-tolyl)-1*H*-1,2,3-triazole **3ea** 0.071 g (yield 61 %) as a brown solid. m.p. = 58–60 °C (lit.<sup>8</sup>, m.p. 57–59 °C). <sup>1</sup>H NMR (400 MHz, DMSO-d<sub>6</sub>): δ 8.97 (s, 1H), 7.95 (d, *J* = 7.2 Hz, 2H), 7.52–7.51 (m, 5H), 7.47–7.43 (m, 1H), 7.39–7.35 (m, 1H), 2.22 (s, 3H); <sup>13</sup>C NMR (100 MHz, DMSO-d<sub>6</sub>): δ 146.47, 136.31, 133.07, 131.45, 130.44, 129.92, 129.00, 128.15, 127.08, 126.03, 125.33, 123.09, 17.49.

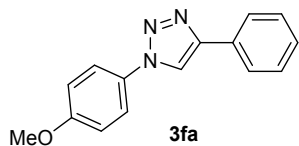

#### 1-(4-methoxyphenyl)-4-phenyl-1*H*-1,2,3-triazole (**3fa**).

The reaction 1-azido-4-methoxybenzene **1f** (0.5 mmol, 0.075 g) and phenylacetylene **2a** (0.5 mmol, 0.051 g, 55 μl) according to the general procedure during 5 hours afforded 1-(4-methoxyphenyl)-4-phenyl-1*H*-1,2,3-triazole **3fa** 0.116 g (yield 92 %) as a light beige solid; m.p. = 163–164 °C (lit.<sup>6</sup>, m.p. 160–162 °C). <sup>1</sup>H NMR (400 MHz, DMSO-d<sub>6</sub>): δ 8.11 (s, 1H), 7.40–7.39 (m, 3H), 7.34 (d, *J* = 8.8 Hz, 2H), 7.29–7.27 (m, 2H), 7.06 (d, *J* = 8.8 Hz, 2H), 3.81 (s, 3H); <sup>13</sup>C NMR (100 MHz, DMSO-d<sub>6</sub>): δ 159.81, 137.68, 134.55, 132.93, 129.17, 128.87, 128.39, 127.17, 126.47, 114.65, 55.55.

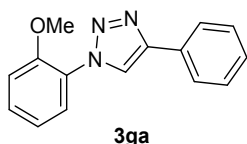

#### 1-(2-methoxyphenyl)-4-phenyl-1*H*-1,2,3-triazole (**3ga**).

The reaction 1-azido-2-methoxybenzene **1g** (0.5 mmol, 0.075 g) and phenylacetylene **2a** (0.5 mmol, 0.051 g, 55  $\mu$ l) according to the general procedure during 7 hours afforded 1-(2-methoxyphenyl)-4-phenyl-*1H*-1,2,3-triazole **3ga** 0.116 g (yield 69 %) as an yellow oil (lit.<sup>6</sup>). <sup>1</sup>H NMR (400 MHz, DMSO-*d*<sub>6</sub>):  $\delta$  8.92 (s, 1H), 7.95 (d, *J* = 7.2 Hz, 2H), 7.68-7.66 (m, 1H), 7.59-7.54 (m, 1H), 7.50-7.46 (m, 2H), 7.39-7.34 (m, 2H), 7.19-7.15 (m, 1H), 3.88 (s, 3H); <sup>13</sup>C NMR (100 MHz, DMSO-*d*<sub>6</sub>):  $\delta$  151.89, 146.23, 130.97, 130.49, 128.99, 128.09, 126.02, 125.74, 125.36, 123.47, 120.92, 113.03, 56.18.

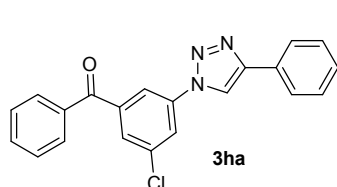

**(3-chloro-5-(4-phenyl-*1H*-1,2,3-triazol-1-yl)phenyl)(phenyl)methanone (3ha).**

The reaction (3-azido-5-chlorophenyl)(phenyl)methanone **1h** (0.5 mmol, 0.129 g) and phenylacetylene **2a** (0.5 mmol, 0.051 g, 55  $\mu$ l) according to the general procedure during 9 hours afforded (3-chloro-5-(4-phenyl-*1H*-1,2,3-triazol-1-yl)phenyl)(phenyl)methanone **3ha** 0.126 g (yield 70 %) as an yellow solid; m.p. = 151–152 °C. <sup>1</sup>H NMR (400 MHz, DMSO-*d*<sub>6</sub>):  $\delta$  9.08 (s, 1H), 7.98-7.93 (m, 2H), 7.82 (d, *J* = 2 Hz, 1H), 7.77 (d, *J* = 7.2 Hz, 2H), 7.64-7.62 (m, 2H), 7.57-7.53 (m, 1H), 7.46-7.39 (m, 4H), 7.36-7.32 (m, 1H). <sup>13</sup>C NMR (100 MHz, DMSO-*d*<sub>6</sub>):  $\delta$  192.43, 147.14, 135.56, 135.35, 134.11, 133.63, 133.04, 131.69, 129.81, 129.40, 129.01, 128.98, 128.63, 128.34, 125.87, 125.29, 122.05. HRMS (ESI-positive mode): calcd for C<sub>21</sub>H<sub>15</sub><sup>35</sup>ClN<sub>3</sub>O ([M]<sup>+</sup>) 360.0904; Found: 360.0896, calcd for C<sub>21</sub>H<sub>15</sub><sup>37</sup>ClN<sub>3</sub>O ([M]<sup>+</sup>) 362.0882; Found: 362.0913.

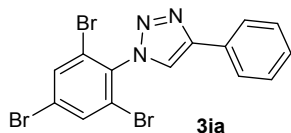

**4-phenyl-1-(2,4,6-tribromophenyl)-*1H*-1,2,3-triazole (3ia).**

The reaction 2-azido-1,3,5-tribromobenzene **1i** (0.5 mmol, 0.178 g) and phenylacetylene **2a** (0.5 mmol, 0.051 g, 55  $\mu$ l) according to the general procedure during 7 hours afforded 4-phenyl-1-(2,4,6-tribromophenyl)-*1H*-1,2,3-triazole **3ia** 0.178 g (yield 78 %) as a white solid, m.p. = 140–142 °C. <sup>1</sup>H NMR (400 MHz, DMSO-*d*<sub>6</sub>):  $\delta$  8.33 (s, 1H), 8.28 (s, 2H), 7.45-7.43 (m, 3H), 7.31-7.28 (m, 2H); <sup>13</sup>C NMR (100 MHz, DMSO-*d*<sub>6</sub>):  $\delta$  138.43, 135.35, 134.39, 132.53, 129.83, 129.30, 127.08, 125.65, 125.38, 124.03. HRMS (ESI-positive mode): calcd for C<sub>14</sub>H<sub>8</sub><sup>79</sup>Br<sub>3</sub>N<sub>3</sub> ([M]<sup>+</sup>) 457.8327; Found 457.8277; calcd for C<sub>14</sub>H<sub>8</sub><sup>81</sup>Br<sub>3</sub>N<sub>3</sub> ([M]<sup>+</sup>) 459.8305; Found 459.8271.

The crystal suitable for X-Ray study was obtained by slow evaporation of ether solution of **3ia**.



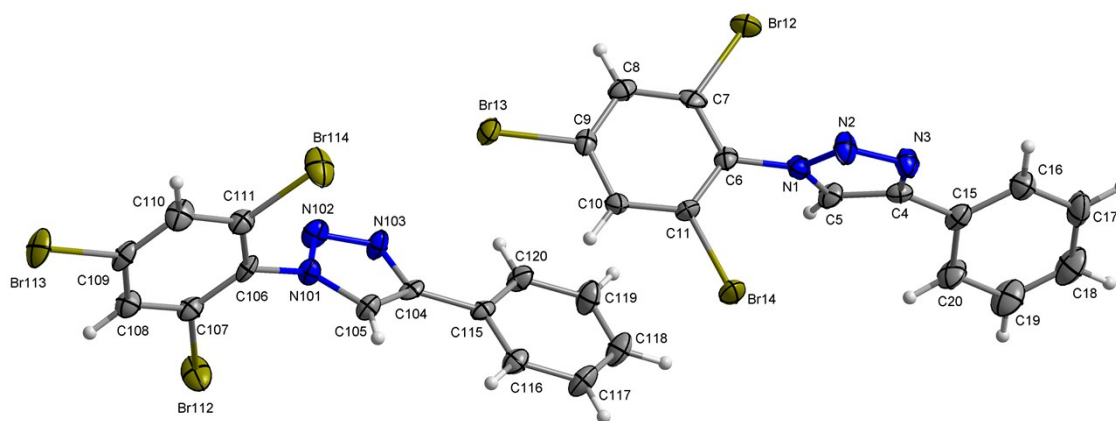

The structure **3ia** ( $C_{14}H_8Br_3N_3$ ) was measured using D8 VENTURE with multilayer monochromator and a Mo-K $\alpha$  Incoatec microfocus sealed tube ( $\lambda = 0.71073$  Å) radiation at 180 K and PHOTON CMOS detector. The structure was in monoclinic system,  $P2_1/n$  space group with lattice parameters  $a = 16.2913$  (7) Å  $b = 10.0932$  (4) Å  $c = 19.7897$  (8) Å,  $\beta = 112.8945$  (12)°,  $Z = 8$ ,  $V = 2997.4$  (2) Å<sup>3</sup>,  $D_c = 2.029$  g cm<sup>-3</sup>,  $\mu(\text{Mo-K}\alpha) = 8.07$  mm<sup>-1</sup>. The data reduction and absorption correction were done with Apex3 software<sup>14</sup>. The structure was solved by charge flipping methods<sup>15</sup> and refined by full matrix least squares on  $F^2$  value using Crystals software<sup>16</sup> to final values  $R = 0.037$  and  $R_w = 0.096$  using 6136 independent reflections ( $\theta_{max} = 26.4^\circ$ ), 362 parameters and 0 restraints. The MCE software<sup>17</sup> was used for visualization of electron density maps. According to common practice the hydrogen atoms attached to carbon atoms were placed geometrically with  $U_{iso}(H)$  in range 1.2–1.5  $U_{eq}$  of parent atom (C). The structure was deposited into Cambridge Structural Database under number CCDC 1513616.

The asymmetric unit is formed by two independent molecules of **3ia**. In the absence of strong hydrogen bond donors the noncovalent intermolecular interactions are dominated by C–H $\cdots$ N interactions supported by Br $\cdots$  $\pi$  and Br $\cdots$ Br interactions, forming a well developed 3D system. For further information on intermolecular interactions see table 1.

**Table 1 The intermolecular interactions in 3ia (Å, °)**

| Interaction                            | D–H  | H $\cdots$ A | D $\cdots$ A | D–H $\cdots$ A |
|----------------------------------------|------|--------------|--------------|----------------|
| C19–H191 $\cdots$ N102 <sup>i</sup>    | 0.95 | 2.67         | 3.579 (9)    | 162            |
| C105–H1051 $\cdots$ N102 <sup>ii</sup> | 0.95 | 2.37         | 3.250 (8)    | 155            |
| C110–H1101 $\cdots$ N2 <sup>iii</sup>  | 0.95 | 2.70         | 3.574 (8)    | 154            |
| Br13 $\cdots$ Br112 <sup>iv</sup>      |      |              | 3.6233 (9)   |                |
| Br113 $\cdots$ Br113 <sup>v</sup>      |      |              | 3.5599 (12)  |                |

Symmetry codes: (i)  $x+1/2, -y+1/2, z-1/2$  (ii)  $-x+1/2, y+1/2, -z+3/2$  (iii)  $-x, -y+1, -z+1$  (iv)  $x-1/2, -y+1/2, z-1/2$  (v)  $-x, -y+1, -z+2$

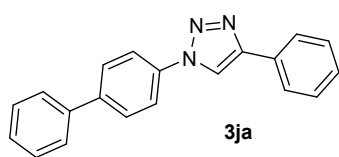

**1-([1,1'-biphenyl]-4-yl)-4-phenyl-1H-1,2,3-triazole (3ja).**

The reaction 4-azido-1,1'-biphenyl **1j** (0.5 mmol, 0.098 g) and phenylacetylene **2a** (0.5 mmol, 0.051 g, 55  $\mu$ l) according to the general procedure during 8 hours afforded 1-([1,1'-biphenyl]-4-yl)-4-phenyl-1H-1,2,3-triazole **3ja** 0.111 g (yield 75 %) as a light-beige solid; m.p. = 152–153 °C.  $^1\text{H}$  NMR (400 MHz, DMSO- $d_6$ ):  $\delta$  8.15 (s, 1H), 7.84 (d,  $J$  = 8.8 Hz, 2H), 7.74 (d,  $J$  = 7.6 Hz, 2H), 7.52–7.48 (m, 4H), 7.43–7.42 (m, 4H), 7.36–7.34 (m, 2H);  $^{13}\text{C}$  NMR (100 MHz, DMSO- $d_6$ ):  $\delta$  148.19, 147.60, 146.88, 142.26, 140.46, 136.75, 136.03, 132.00, 130.26, 129.52, 127.38, 126.72, 124.82, 124.19; HRMS (ESI-positive mode): calcd for  $\text{C}_{20}\text{H}_{16}\text{N}_3$  ( $[\text{M}] + \text{H}^+$ ) 298.1339; Found 298.1368

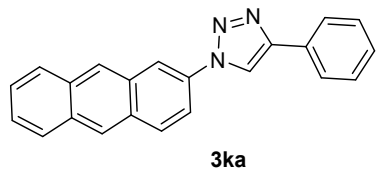

**1-(anthracen-2-yl)-4-phenyl-1H-1,2,3-triazole (3ka).**

The reaction 2-azidoanthracene **1k** (0.5 mmol, 0.110 g) and phenylacetylene **2a** (0.5 mmol, 0.051 g, 55  $\mu$ l) according to the general procedure during 6 hours afforded 1-(anthracen-2-yl)-4-phenyl-1H-1,2,3-triazole **3ka** 0.113 g (yield 71 %) as a brown solid; m.p. = 200–202 °C (lit.<sup>9</sup>, m.p. 200 °C).  $^1\text{H}$  NMR (300 MHz, DMSO- $d_6$ ):  $\delta$  8.54–8.48 (m, 2H), 8.42–8.38 (m, 2H), 8.10–8.06 (m, 1H), 8.03–7.99 (m, 1H), 7.95 (s, 1H), 7.54–7.51 (m, 3H), 7.40–7.36 (m, 2H), 7.34–7.32 (m, 2H).

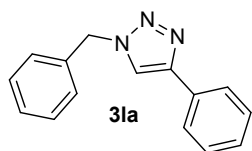

**1-benzyl-4-phenyl-1H-1,2,3-triazole (3la).**

The reaction (azidomethyl)benzene **1l** (0.5 mmol, 0.067 g) and phenylacetylene **2a** (0.5 mmol, 0.051 g, 55  $\mu$ l) according to the general procedure during 6 hours afforded 1-benzyl-4-phenyl-1H-1,2,3-triazole **3la** 0.102 g (yield 87 %) as a white solid; m.p. = 125–126 °C (lit.<sup>6</sup>, m.p. 126–128 °C).  $^1\text{H}$  NMR (400 MHz, DMSO- $d_6$ ):  $\delta$  7.95 (s, 1H), 7.46–7.43 (m, 5H), 7.41–7.37 (m, 5H), 5.68 (s, 2H);  $^{13}\text{C}$  NMR (100 MHz, DMSO- $d_6$ ):  $\delta$  146.67, 136.04, 130.67, 128.92, 128.83, 128.19, 127.91, 126.84, 125.17, 121.59, 53.03.

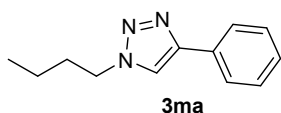

**1-butyl-4-phenyl-1H-1,2,3-triazole (3ma).**

The reaction 1-azidobutane **1m** (0.5 mmol, 0.0957 g) and phenylacetylene **2a** (0.5 mmol, 0.051 g, 55  $\mu$ l) according to the general procedure during 6 hours afforded 1-butyl-4-phenyl-1H-1,2,3-triazole **3ma** 0.066 g (yield 66 %) as a Colorless liquid; (lit.<sup>6</sup>).  $^1\text{H}$  NMR (400 MHz,  $\text{CDCl}_3$ ):  $\delta$  7.83 (t,  $J$  = 7.2 Hz, 2 H), 7.73 (s, 1 H), 7.44–7.32 (m, 3 H), 7.42 (t,  $J$  = 6.9

Hz, 2 H), 1.89–1.83 (m, 2 H), 1.44–1.36 (m, 2 H), 0.97 (t,  $J = 6.9$  Hz, 3 H) ;  $^{13}\text{C}$  NMR (100 MHz,  $\text{CDCl}_3$ ):  $\delta$  151.07, 130.78, 128.32, 128.09, 125.45, 119.19, 50.88, 32.63, 19.71, 13.15.

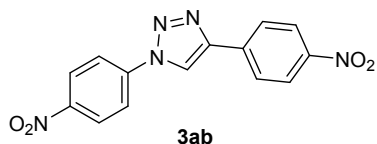

#### 1,4-bis(4-nitrophenyl)-1H-1,2,3-triazole (**3ab**).

The reaction 1-azido-4-nitrobenzene **1a** (0.5 mmol, 0.082 g) and 1-ethynyl-4-nitrobenzene **2b** (0.5 mmol, 0.073 g) according to the general procedure during 5 hours afforded 1,4-bis(4-nitrophenyl)-1H-1,2,3-triazole **3ab** 0.120 g (yield 77 %) as a white solid; m.p. = 299–300 °C (lit.<sup>10</sup>, m.p. 305–310(dec) °C).  $^1\text{H}$  NMR (400 MHz,  $\text{DMSO-d}_6$ ):  $\delta$  8.40–8.38 (m, 3H), 8.24 (d,  $J = 9.2$  Hz, 2H), 7.75 (d,  $J = 9.2$  Hz, 2H), 7.62 (d,  $J = 8.8$  Hz, 2H);  $^{13}\text{C}$  NMR (100 MHz,  $\text{DMSO-d}_6$ ):  $\delta$  147.79, 147.72, 140.58, 136.31, 134.91, 132.32, 130.15, 126.68, 125.22, 124.13.

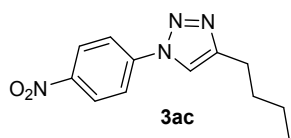

#### 1-(4-nitrophenyl)-4-butyl-1H-1,2,3-triazole (**3ac**).

The reaction 1-azido-4-nitrobenzene **1a** (0.5 mmol, 0.082 g) and hexyne-1 **2c** (0.5 mmol, 0.042 g, 30  $\mu\text{l}$ ) according to the general procedure during 6 hours afforded 1-(4-nitrophenyl)-4-butyl-1H-1,2,3-triazole **3ac** 0.113 g (yield 92 %) as a yellow solid, m.p. = 198–200 °C.  $^1\text{H}$  NMR (400 MHz,  $\text{DMSO-d}_6$ ):  $\delta$  8.79 (s, 1H), 8.43 (d,  $J = 9.2$  Hz, 2H), 8.19 (d,  $J = 9.2$  Hz, 2H), 2.72 (t,  $J = 7.4$  Hz, 2H), 1.69–1.62 (m, 2H), 1.42–1.34 (m, 2H), 0.92 (t,  $J = 7.4$  Hz, 3H);  $^{13}\text{C}$  NMR (100 MHz,  $\text{DMSO-d}_6$ ):  $\delta$  148.87, 146.42, 141.04, 125.59, 120.53, 120.17, 30.73, 24.59, 21.66, 13.68.

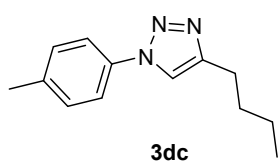

#### 4-butyl-1-(p-tolyl)-1H-1,2,3-triazole (**3dc**).

The reaction 1-azido-4-methylbenzene **1d** (0.5 mmol, 0.067 g) and hexyne-1 **2c** (0.5 mmol, 0.0415 g, 30  $\mu\text{l}$ ) according to the general procedure during 5 hours afforded 4-butyl-1-(p-tolyl)-1H-1,2,3-triazole **3dc** 0.086 g (yield 80 %) as a light beige solid. m.p. = 185–186 °C (lit.<sup>12</sup>, m.p. 187–188 °C).  $^1\text{H}$  NMR (300 MHz,  $\text{DMSO-d}_6$ ):  $\delta$  7.70 (s, 1H), 7.42 (s, 4H), 2.66–2.61 (t,  $J = 7.6$  Hz, 2H), 2.41 (s, 3H), 1.54–1.44 (m, 2H), 1.30–1.20 (m, 3H), 0.83–0.78 (t,  $J = 7.4$  Hz, 3H).

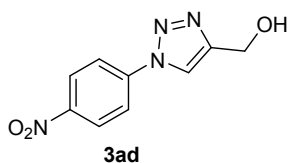

#### (1-(4-nitrophenyl)-1H-1,2,3-triazol-4-yl)methanol (**3ad**).

The reaction 1-azido-4-nitrobenzene **1a** (0.5 mmol, 0.082 g) and propargyl alcohol **2d** (0.5 mmol, 0.028 g, 27  $\mu\text{l}$ ) according to the general procedure during 6 hours afforded (1-(4-nitrophenyl)-1H-1,2,3-triazol-4-yl)methanol **3ad** 0.102 g (yield 93 %) as a yellow solid, m.p. = 201–202 °C (lit.<sup>11</sup>, m.p. 201–202 °C).  $^1\text{H}$  NMR

(400 MHz, DMSO- $d_6$ ):  $\delta$  8.243 (d,  $J$  = 9.2 Hz, 2H), 8.05 (d,  $J$  = 9.2 Hz, 2H), 7.92 (s, 1H), 5.74 (t,  $J$  = 5.7 Hz, 1H), 5.41 (t,  $J$  = 5.6 Hz, 1H).

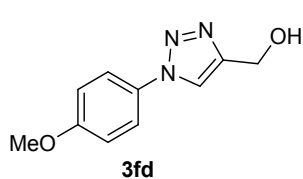

**(1-(4-methoxyphenyl)-1H-1,2,3-triazol-4-yl)methanol (3fd).**

The reaction 1-azido-4-methoxybenzene **1f** (0.5 mmol, 0.075 g) and propargyl alcohol **2d** (0.5 mmol, 0.028 g, 27  $\mu$ l) according to the general procedure during 7 hours afforded (1-(4-methoxyphenyl)-1H-1,2,3-triazol-4-yl)methanol **3fd** 0.062 g (yield 61 %) as a light yellow solid; m.p. = 127-128 °C (lit.<sup>11</sup>, m.p. 127-129 °C). <sup>1</sup>H NMR (400 MHz, DMSO- $d_6$ ):  $\delta$  8.58 (s, 1H), 7.80 (d,  $J$  = 6.8, 2H), 7.145 (d,  $J$  = 4.8, 2H), 4.58 (s, 2H), 3.82 (s, 3H).

**Table 2 Preparation of 1,4-disubstituted-1,2,3-triazoles from ADTs**

| Entry | ADT, R=                   | Triazole, Yield [%] <sup>b</sup> | <i>t</i> [h] |
|-------|---------------------------|----------------------------------|--------------|
| 1     | 4a, 4-O <sub>2</sub> N    | <b>3aa</b> , 95                  | 6            |
| 2     | 4b, 3-O <sub>2</sub> N    | <b>3ba</b> , 89                  | 7            |
| 3     | 4c, 4-Me                  | <b>3da</b> , 86                  | 9            |
| 4     | 4d, 2-(PhCO)-5-Cl         | <b>3ha</b> , 67                  | 9            |
| 5     | 4e, 2,4,6-Br <sub>3</sub> | <b>3ia</b> , 81                  | 7            |

<sup>a</sup> reactions conditions: ADT (1 equiv), NaN<sub>3</sub> (1.3 equiv), acetylene (1 equiv), water (10 ml), microwave irradiation (75 °C, constant power 80 W); <sup>b</sup> isolated yield

**General Procedure for Preparation 1,4-disubstituted-1,2,3-triazoles from arenediazonium tosylates (4a-e) and phenylacetylene (2a).**

The mixture of arenediazonium tosylates (**4a-e**) (0.5 mmol) and NaN<sub>3</sub> (0.65 mmol, 0.042 g) in water (10 ml) was vigorously stirred during 2–3 minutes. After the phenylacetylene **2a** (0.55 mmol, 0.051 g, 55  $\mu$ l), 10 mol % Zn(OAc)<sub>2</sub> (0.05 mmol, 0.011 g) and 20 mol % ascorbic acid (0.10 mmol, 0.017 g) were added to reaction mixture. The reaction vessel was placed to microwave reactor ( $t$  = 75 °C and  $P$  = 80 B) and heated until full conversion of starting materials and intermediate (TLC, hexane:EtOAc = 7:3). After completing reaction, the reaction mixture was extracted with CH<sub>2</sub>Cl<sub>2</sub> (3×20 mL), washed by (water, brine) and dried with anhydrous Na<sub>2</sub>SO<sub>4</sub>. The solvent was removed in vacuo to give the crude 1,4-disubstitutions-1,2,3-triazoles (**3aa**, **3ba**, **3da**, **3ha**, **3ia**) which were purified by column chromatography(silica gel, eluent hexane:EtOAc=9:1).

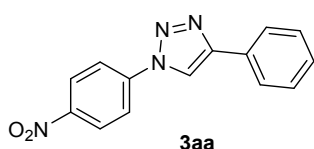

### 1-(4-nitrophenyl)-4-phenyl-1*H*-1,2,3-triazole (**3aa**).

The reaction 4-nitroarene diazonium tosylate **4a** (0.5 mmol, 0.16 g) according to the general procedure during 6 hours afforded 1-(4-nitrophenyl)-4-phenyl-1*H*-1,2,3-triazole **3aa** 0.126 g (yield 95 %) as a light yellow solid. m.p = 151–152 °C (lit.<sup>6</sup>, m.p. 152–154 °C).

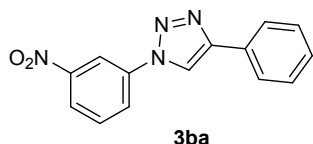

### 1-(3-nitrophenyl)-4-phenyl-1*H*-1,2,3-triazole (**3ba**).

The reaction 3-nitroarene diazonium tosylate **4b** (0.5 mmol, 0.16 g) according to the general procedure during 7 hours afforded 1-(3-nitrophenyl)-4-phenyl-1*H*-1,2,3-triazole **3ba** 0.118 g (yield 89 %) as a light yellow solid. m.p = 191–192 °C (lit.<sup>6</sup>, m.p. 192–194 °C).

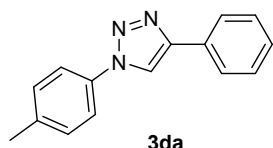

### 4-phenyl-1-(p-tolyl)-1*H*-1,2,3-triazole (**3da**).

The reaction 4-nitroarene diazonium tosylate **4d** (0.5 mmol, 0.145 g) and according to the general procedure during 9 hours afforded 4-phenyl-1-(p-tolyl)-1*H*-1,2,3-triazole **3da** 0.101 mg (yield 86 %) as a light beige solid. m.p = 163–164 °C (lit.<sup>6</sup>, m.p. 165–167 °C).

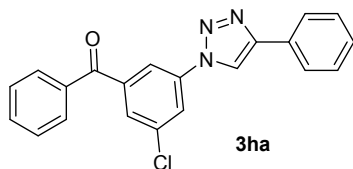

### 3-chloro-5-(4-phenyl-1*H*-1,2,3-triazol-1-yl)phenyl(phenyl)methanone (**3ha**).

The reaction 3-diazo-5-chlorophenyl(phenyl)methanone tosylate **4h** (0.5 mmol, 0.207 g) according to the general procedure during 9 hours afforded (3-chloro-5-(4-phenyl-1*H*-1,2,3-triazol-1-yl)phenyl(phenyl)methanone **3ha** 0.120 mg (yield 67 %) as a yellow solid; m.p. = 151–152 °C.

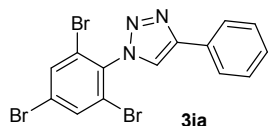

### 4-phenyl-1-(2,4,6-tribromophenyl)-1*H*-1,2,3-triazole (**3ia**).

The reaction 2,4,6-tribromoarene diazonium tosylate **4i** (0.5 mmol, 0.224 g) according to the general procedure during 7 hours afforded 4-phenyl-1-(2,4,6-tribromophenyl)-1*H*-1,2,3-triazole **3ia** 0.185 g (yield 81 %) as a white solid; m.p. = 140–142 °C.

## General Procedure for Preparation 1,4,5-trisubstituted-1,2,3-triazoles from aromatic azides (**1a**, **1d**, **1g**, **1e**, **1n**) and disubstituted acetylenes (**2e-j**).

The mixture of azide (**1a**, **1d**, **1g**, **1e**, **1o**) (0.5 mmol) and disubstituted acetylenes (**2e-j**) in water (10 ml) was vigorously stirred during 2–3 minutes. After the 10 mol % Zn(OAc)<sub>2</sub> (0.05 mmol, 0.011 g) and 20 mol % ascorbic acid (0.10 mmol, 0.017 g) were added to reaction mixture. The

reaction vessel was placed to microwave reactor ( $t = 130\text{ }^{\circ}\text{C}$  and  $P = 150\text{ B}$ ) and heated until full conversion of starting materials and intermediate (TLC, hexane:EtOAc = 7:3). After completing reaction, the reaction mixture was extracted with  $\text{CH}_2\text{Cl}_2$  ( $3 \times 20\text{ mL}$ ), washed by water, brine and dried with anhydrous  $\text{Na}_2\text{SO}_4$ . The solvent was removed in vacuo to give the crude 1,4,5-trisubstitued-1,2,3-triazoles (**3ae**, **3ee**, **3ge**, **3af**, **3ng**, **3ah**, **3dh**, **3nh**, **3ai**, **3aj**) which were purified by column chromatography (silica gel, eluent hexane:EtOAc = 9:1).

#### 1-(4-nitrophenyl)-4,5-diphenyl-1*H*-1,2,3-triazole (**3ae**).

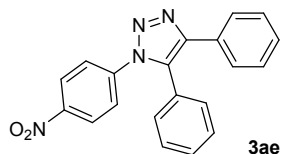

The reaction 1-azido-4-nitrobenzene **1a** (0.5 mmol, 0.082 g) and tolane **2e** (0.5 mmol, 0.089 g) according to the general procedure during 7 hours afforded 1-(4-nitrophenyl)-4,5-diphenyl-1*H*-1,2,3-triazole **3ae** 0.164 g (yield 96 %) as a light yellow solid, m.p. =  $239\text{--}240\text{ }^{\circ}\text{C}$  (lit.<sup>6</sup>, m.p.  $238\text{--}240\text{ }^{\circ}\text{C}$ ).  $^1\text{H}$  NMR (400 MHz,  $\text{DMSO-d}_6$ ):  $\delta$  8.32 (d,  $J = 8.8\text{ Hz}$ , 2H), 7.68 (d,  $J = 8.8\text{ Hz}$ , 2H), 7.53–7.45 (m, 5H), 7.41–7.33 (m, 5H).

#### 1-(2-methoxyphenyl)-4,5-diphenyl-1*H*-1,2,3-triazole (**3ge**).

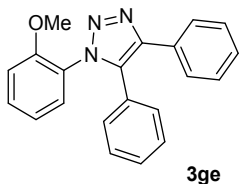

The reaction 1-azido-2-methoxybenzene **1g** (1 mmol, 0.149 g) and tolane **2e** (0.5 mmol, 0.089 g) according to the general procedure during 8 hours afforded 1-(2-methoxyphenyl)-4,5-diphenyl-1*H*-1,2,3-triazole **3ge** 0.083 g (yield 51 %) as a brown solid, m.p. =  $223\text{--}224\text{ }^{\circ}\text{C}$ .  $^1\text{H}$  NMR (400 MHz,  $\text{DMSO-d}_6$ ):  $\delta$  7.55–7.52 (m, 3 H), 7.49–7.45 (m, 1H), 7.37–7.31 (m, 6H), 7.24–7.22 (m, 2H), 7.11–7.04 (m, 2H), 3.55 (s, 1H);  $^{13}\text{C}$  NMR (100 MHz,  $\text{DMSO-d}_6$ ):  $\delta$  153.77, 142.66, 131.89, 130.75, 129.49, 129.39, 128.96, 128.68, 127.90, 127.40, 126.50, 124.65, 120.59, 112.56, 55.58; HRMS (ESI-positive mode): calcd for  $\text{C}_{21}\text{H}_{18}\text{N}_3\text{O}$  ( $[\text{M}] + \text{H}^+$ ) 328.1450; Found 328.1426.

#### 4,5-diphenyl-1-(*o*-tolyl)-1*H*-1,2,3-triazole (**3ee**).

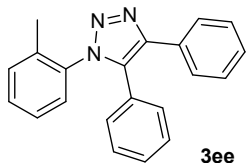

The reaction 1-azido-2-methylbenzene **1e** (1 mmol, 0.130 g) and tolane **2e** (0.5 mmol, 0.089 g) according to the general procedure during 8 hours afforded 4,5-diphenyl-1-(*o*-tolyl)-1*H*-1,2,3-triazole **3ee** 0.073 g (yield 47 %) as a yellow solid, m.p. =  $215\text{--}216\text{ }^{\circ}\text{C}$ .  $^1\text{H}$  NMR (400 MHz,  $\text{DMSO-d}_6$ ):  $\delta$  7.57–7.55 (m, 2H), 7.48–7.46 (m, 4H), 7.43–7.42 (m, 4H), 7.11 (d,  $J = 7.6\text{ Hz}$ , 4H), 2.28 (s, 3H);  $^{13}\text{C}$  NMR (100 MHz,  $\text{DMSO-d}_6$ ):  $\delta$  153.13, 142.03, 131.26, 130.12, 128.87, 128.77, 128.33, 128.09, 128.06, 127.27, 126.77, 125.88, 119.97, 111.93, 20.85; HRMS (ESI-positive mode): calcd for  $\text{C}_{21}\text{H}_{18}\text{N}_3$  ( $[\text{M}] + \text{H}^+$ ) 312.1574; Found 312.1565.

#### 1-(4-nitrophenyl)-1*H*-1,2,3-triazole-4,5-dicarboxylic acid (**3af**).

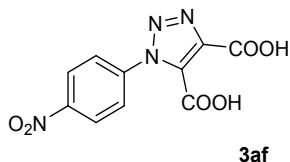

The reaction 1-azido-4-nitrobenzene **1a** (0.5mmol, 0.082 g) and but-2-ynedioic acid **2f** (0.5 mmol, 0.057 g) according to the general procedure during 3 hours afforded 1-(4-nitrophenyl)-*1H*-1,2,3-triazole-4,5-dicarboxylic acid **3af** 0.083 g (yield 60 %) as an yellow solid, m.p. = 200–202°C (lit.<sup>13</sup>, m.p. 200-202 °C). <sup>1</sup>H NMR (400 MHz, DMSO-*d*<sub>6</sub>): δ 7.93 (d, *J* = 9.2 Hz, 2H), 6.68 (broad s, 2H), 6.59 (d, *J* = 9.2 Hz, 2H); <sup>13</sup>C NMR (100 MHz, DMSO-*d*<sub>6</sub>): δ 155.73, 135.61, 126.42, 125.61, 120.70, 112.38; HRMS (ESI-positive mode): calcd for C<sub>10</sub>H<sub>7</sub>N<sub>4</sub>O<sub>6</sub> ([M]<sup>+</sup>+H<sup>+</sup>) 279.0366; Found 279.0332.

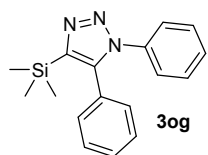

**1,5-diphenyl-4-(trimethylsilyl)-*1H*-1,2,3-triazole (3og).**

The reaction azidobenzene **1o** (0.5 mmol, 0.060 g) and trimethyl(phenylethynyl)silane **2g** (0.5 mmol, 0.087 g) according to the general procedure during 6 hours afforded 1,4-diphenyl-5-(trimethylsilyl)-*1H*-1,2,3-triazole **3og** 0.095 g (yield 65 %) as a light beige solid, m.p. = 94–95 °C. <sup>1</sup>H NMR (400 MHz, DMSO-*d*<sub>6</sub>): δ 7.44-7.38 (m, 6H), 7.35-7.31 (m, 2H), 7.29-7.26 (m, 2H), 0.14 (s, 9H); <sup>13</sup>C NMR (100 MHz, DMSO-*d*<sub>6</sub>): δ 143.74, 143.64, 136.03, 130.05, 129.31, 129.22, 129.07, 128.41, 128.08, 125.38, -0.81. HRMS (ESI-positive mode): calcd for C<sub>17</sub>H<sub>20</sub>N<sub>3</sub>Si ([M]<sup>+</sup>+H<sup>+</sup>) 294.1421; Found 294.1411.

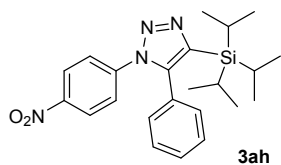

**1-(4-nitrophenyl)-5-phenyl-4-(triisopropylsilyl)-*1H*-1,2,3-triazole (3ah).**

The reaction 1-azido-4-nitrobenzene **1a** (0.5 mmol, 0.082 g) and triisopropyl(phenylethynyl)silane **2h** (0.5 mmol, 0.142 g) according to the general procedure during 5.5 hours afforded 1-(4-nitrophenyl)-5-phenyl-4-(triisopropylsilyl)-*1H*-1,2,3-triazole **3ah** 0.169 g (yield 80 %) as a slight yellow solid, m.p. = 84–85 °C. <sup>1</sup>H NMR (400 MHz, DMSO-*d*<sub>6</sub>): δ 8.25 (d, *J* = 8.8 Hz, 2H), 7.63 (d, *J* = 8.8 Hz, 2H), 7.46-7.39 (m, 3H), 7.36-7.34 (m, 2H), 1.23-1.14 (m, 3H), 0.98-0.96 (m, 18H); <sup>13</sup>C NMR (100 MHz, DMSO-*d*<sub>6</sub>): δ 147.08, 144.47, 140.99, 140.77, 130.35, 129.90, 128.55, 127.90, 126.29, 124.65, 18.54, 11.11; HRMS (ESI-positive mode): calcd for C<sub>23</sub>H<sub>31</sub>N<sub>4</sub>O<sub>2</sub>Si ([M]<sup>+</sup>+H<sup>+</sup>) 423.2216, Found 423.2214.

The crystal suitable for X-Ray study was obtained by slow evaporation of ether solution of **3ah**.

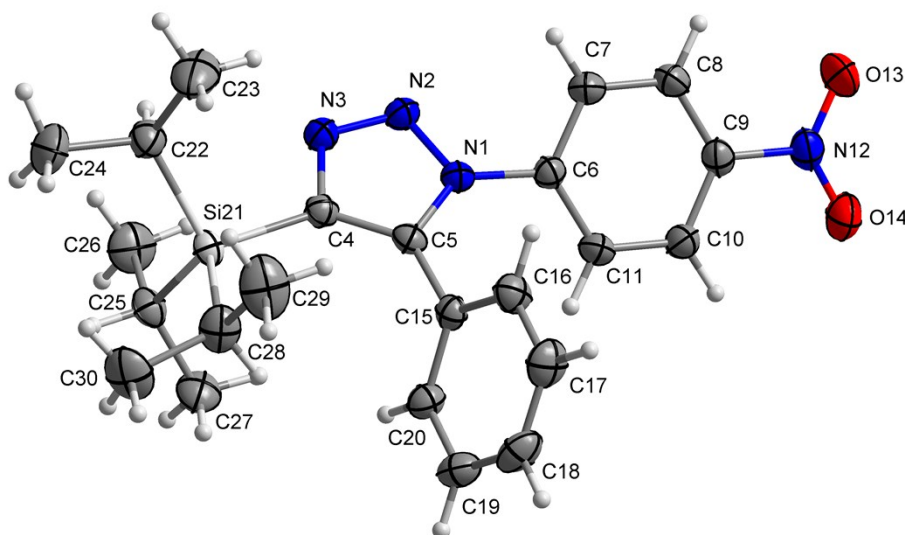

The structure **3ha** ( $C_{14}H_8Br_3N_3$ ) was measured using D8 VENTURE with multilayer monochromator and a Mo-K $\alpha$  Incoatec microfocus sealed tube ( $\lambda = 0.71073$  Å) radiation at 180 K and PHOTON CMOS detector. The structure was in orthorhombic system, *Pbca* space group with lattice parameters  $a = 15.6516$  (5) Å  $b = 14.7041$  (4) Å  $c = 20.8303$  (6) Å,  $Z = 8$ ,  $V = 4793.9$  (2) Å<sup>3</sup>,  $D_c = 1.171$  g cm<sup>-3</sup>,  $\mu(\text{Mo-K}\alpha) = 0.12$  mm<sup>-1</sup>. The data reduction and absorption correction were done with Apex3 software<sup>14</sup>. The structure was solved by charge flipping methods<sup>15</sup> and refined by full matrix least squares on  $F^2$  value using Crystals software<sup>16</sup> to final values  $R = 0.039$  and  $R_w = 0.101$  using 4899 independent reflections ( $\theta_{max} = 26.4^\circ$ ), 271 parameters and 0 restraints. The MCE software<sup>17</sup> was used for visualization of electron density maps. According to common practice the hydrogen atoms attached to carbon atoms were placed geometrically with  $U_{iso}(\text{H})$  in range 1.2-1.5  $U_{eq}$  of parent atom (C). The structure was deposited into Cambridge Structural Database under number CCDC 1513617.

The asymmetric unit is formed by a single molecule of **3ha**. In the absence of strong hydrogen bond donors the noncovalent intermolecular interactions are dominated by C–H $\cdots$ N and C–H $\cdots$ O interactions, with C–H $\cdots$ N interaction forming a supramolecular dimer and the remaining interactions connecting the dimers throughout the structure. For further information on intermolecular interactions see table 3.

**Table 3** The intermolecular interactions in **3ha** (Å, °)

| Interaction                          | D–H  | H $\cdots$ A | D $\cdots$ A | D–H $\cdots$ A |
|--------------------------------------|------|--------------|--------------|----------------|
| C7–H71 $\cdots$ N2 <sup>i</sup>      | 0.95 | 2.47         | 3.261 (2)    | 140            |
| C17–H171 $\cdots$ O14 <sup>ii</sup>  | 0.95 | 2.65         | 3.284 (2)    | 125            |
| C20–H201 $\cdots$ O14 <sup>iii</sup> | 0.95 | 2.72         | 3.434 (2)    | 130            |



Symmetry codes: (i) -x+1, -y+2, -z+1 (ii) x-1/2, y, -z+3/2 (iii) -x+3/2, y-1/2, z

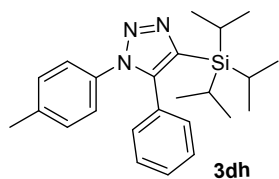

**5-phenyl-1-(p-tolyl)-4-(triisopropylsilyl)-1H-1,2,3-triazole (3dh).**

The reaction 1-azido-4-methylbenzene **1d** (0.5 mmol, 0.0665 g) and triisopropyl(phenylethynyl)silane **2h** (0.5 mmol, 0.142 g) according to the general procedure during 6.5 hours afforded 5-phenyl-1-(p-tolyl)-4-(triisopropylsilyl)-1H-1,2,3-triazole **3dh** 0.154 g (yield 79 %) as a light yellow solid, m.p. = 62–63 °C. <sup>1</sup>H NMR (400 MHz, DMSO-d<sub>6</sub>): δ 7.40–7.35 (m, 3H), 7.28–7.26 (m, 2H), 7.22–7.17 (m, 4H), 2.28 (s, 3H), 1.23–1.15 (m, 3H), 0.98–0.97 (m, 18H); <sup>13</sup>C NMR (100 MHz, DMSO-d<sub>6</sub>): δ 144.21, 139.66, 138.53, 133.69, 130.22, 129.45, 129.28, 128.56, 128.11, 125.23, 20.48, 18.47, 11.03. HRMS (ESI-positive mode): calcd for C<sub>24</sub>H<sub>34</sub>N<sub>3</sub>Si ([M]<sup>+</sup>) 392.2522, Found: 392.2509.

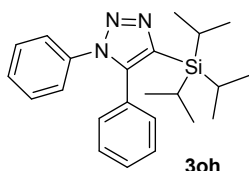

**1,5-diphenyl-4-(triisopropylsilyl)-1H-1,2,3-triazole (3oh).**

The reaction azidobenzene **1o** (0.5 mmol, 0.060 g) and triisopropyl(phenylethynyl)silane **2h** (0.5 mmol, 0.142 g) according to the general procedure during 7 hours afforded 1,5-diphenyl-4-(triisopropylsilyl)-1H-1,2,3-triazole **3oh** 0.131 g (yield 70 %) as a light yellow solid, m.p. = 68–70 °C. <sup>1</sup>H NMR (400 MHz, DMSO-d<sub>6</sub>): δ 7.42–7.37 (m, 6H), 7.34–7.30 (m, 2H), 7.28–7.25 (m, 2H), 1.23 (m, 3H), 0.98–0.96 (m, 18H); <sup>13</sup>C NMR (100 MHz, DMSO-d<sub>6</sub>): δ 143.18, 143.08, 135.47, 129.50, 128.75, 128.66, 128.52, 127.85, 127.52, 124.83, 18.549, 11.11. HRMS (ESI-positive mode): calcd for C<sub>25</sub>H<sub>32</sub>N<sub>3</sub>Si ([M]<sup>+</sup>) 378.2365; Found: 378.2361.

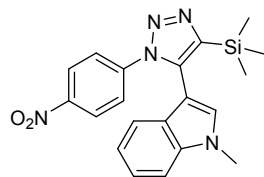

**1-methyl-3-(1-(4-nitrophenyl)-4-(trimethylsilyl)-1H-1,2,3-triazol-5-yl)-indole (3ai).**

The reaction 1-azido-4-nitrobenzene **1a** (1 mmol, 0.164 g) and 1-methyl-3-((trimethylsilyl)ethynyl)-indole **2i** (0.5 mmol, 0.114 g) according to the general procedure during 8 hours afforded 1-methyl-3-(1-(4-nitrophenyl)-5-(trimethylsilyl)-1H-1,2,3-triazol-4-yl)-indole **3ai** 0.139 g (yield 69 %) as an orange solid, m.p. = 130–131 °C. <sup>1</sup>H NMR (400 MHz, DMSO-d<sub>6</sub>): δ 8.20 (d, *J* = 9.2 Hz, 2H), 7.68 (d, *J* = 9.2 Hz, 2H), 7.62 (s, 1H), 7.50 (d, *J* = 8.4 Hz, 1H), 7.16 (t, *J* = 6.8, 9.6 Hz, 1H), 7.00–6.92 (m, 2H), 3.86 (s, 3H), 0.11 (s, 9H); <sup>13</sup>C NMR (100 MHz, DMSO-d<sub>6</sub>): δ 146.84, 145.87, 141.44, 137.78, 136.45, 131.09, 126.79, 125.14, 124.70, 122.02, 120.18, 118.48, 110.47, 99.58, 32.81, -0.90. HRMS (ESI-positive mode): calcd for C<sub>20</sub>H<sub>22</sub>N<sub>5</sub>O<sub>2</sub>Si ([M]<sup>+</sup>) 392.2522; Found: 392.2509.

The crystal suitable for X-Ray study was obtained by slow evaporation of ether solution of **3ai**.

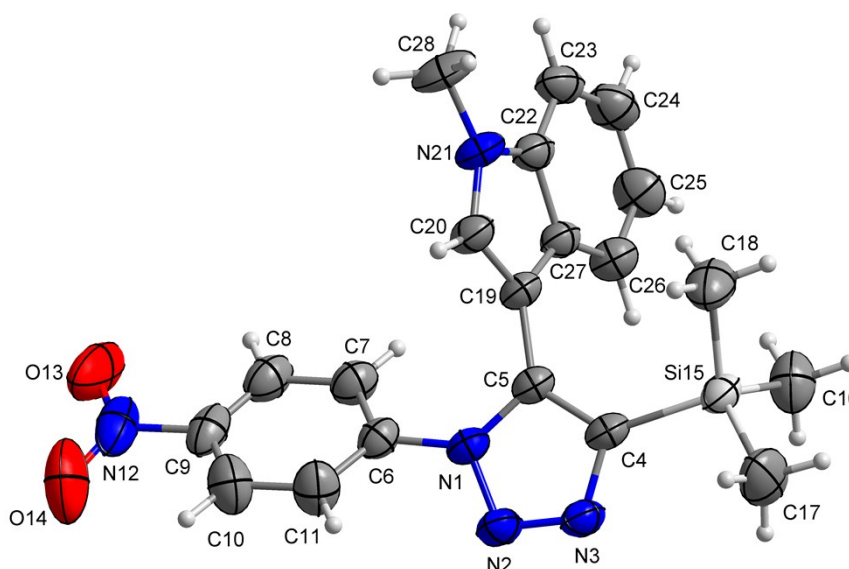

The structure **3ai** ( $C_{20}H_{21}N_5O_2Si$ ) was measured using D8 VENTURE with multilayer monochromator and a Cu-K $\alpha$  Incoatec microfocus sealed tube ( $\lambda = 1.54178 \text{ \AA}$ ) radiation at 180 K and PHOTON CMOS detector. The structure was in triclinic system,  $P\bar{1}$  space group with lattice parameters  $a = 9.4684 (3) \text{ \AA}$ ,  $b = 10.4692 (4) \text{ \AA}$ ,  $c = 12.7710 (4) \text{ \AA}$ ,  $\alpha = 96.2634 (12)^\circ$ ,  $\beta = 95.7478 (12)^\circ$ ,  $\gamma = 113.6438 (11)^\circ$ ,  $Z = 2$ ,  $V = 1138.27 (7) \text{ \AA}^3$ ,  $D_c = 1.142 \text{ g cm}^{-3}$ ,  $\mu(\text{Cu-K}\alpha) = 1.10 \text{ mm}^{-1}$ . The data reduction and absorption correction were done with Apex3 software<sup>14</sup>. The structure was solved by charge flipping methods<sup>15</sup> and refined by full matrix least squares on F squared value using Crystals software<sup>16</sup> to final values  $R = 0.047$  and  $R_w = 0.132$  using 4161 independent reflections ( $\Theta_{max} = 68.4^\circ$ ), 253 parameters and 0 restraints. The MCE software<sup>17</sup> was used for visualization of electron density maps. According to common practice the hydrogen atoms attached to carbon atoms were placed geometrically with  $U_{iso}(\text{H})$  in range 1.2-1.5  $U_{eq}$  of parent atom (C). The loosely bound disordered hexene was located in vicinity of inversion center, resulting in unclear atomic positions and significant refinement instability; therefore it was removed from the structure using PLATON squeeze utility, resulting in void channels in the structure of  $142 \text{ \AA}^3$  for unit cell. The structure was deposited into Cambridge Structural Database under number CCDC 1513614.

The asymmetric unit is formed by one independent molecule of **3ai**. Full analysis of non-covalent interactions cannot be done, since the disordered solvent was excluded from the structure, but the interactions of **3ai** itself can still provide some information about the structure packing. The C–H $\cdots$ O and C–H $\cdots\pi$  interactions connect **3ai** molecules into strips, which are further connected by  $\pi\cdots\pi$  interactions into a well developed framework. For further information on intermolecular interactions see table 4.

**Table 4 The intermolecular interactions in 3ia ( $\text{\AA}$ ,  $^\circ$ )**

| Interaction | D–H | H $\cdots$ A | D $\cdots$ A | D–H $\cdots$ A |
|-------------|-----|--------------|--------------|----------------|
|-------------|-----|--------------|--------------|----------------|

|                              |      |       |           |     |
|------------------------------|------|-------|-----------|-----|
| C24–H241···O13 <sup>i</sup>  | 0.95 | 2.51  | 3.303 (3) | 141 |
| C18–H181···C25 <sup>ii</sup> | 0.95 | 2.886 | 3.823 (3) | 169 |

Symmetry codes: (i) -x+1, -y+1, -z (ii) -x+2, -y+1, -z+1

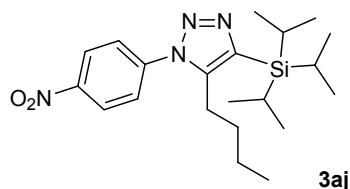

### 5-butyl-1-(4-nitrophenyl)-4-(triisopropylsilyl)-1H-1,2,3-triazole (**3aj**).

The reaction 1-azido-4-nitrobenzene **1a** (0.5 mmol, 0.082 g) and hex-1-yn-1-yltriisopropylsilane **2j** (0.5 mmol, 0.119 g) according to the general procedure during 7 hours afforded 5-butyl-1-(4-nitrophenyl)-4-(triisopropylsilyl)-1H-1,2,3-triazole **3aj** 0.138 g (yield 69 %) as a light yellow solid, m.p. = 59–60 °C. <sup>1</sup>H NMR (400 MHz, DMSO-*d*<sub>6</sub>): δ 8.44 (d, *J* = 9.2 Hz, 2H), 7.99 (d, *J* = 8.8 Hz, 2H), 2.89–2.85 (m, 2H), 1.50–1.43 (m, 3H), 1.14–1.09 (m, 22H), 0.71–0.67 (m, 3H); <sup>13</sup>C NMR (100 MHz, DMSO-*d*<sub>6</sub>): δ 147.58, 144.68, 138.88, 126.36, 125.15, 23.14, 21.96, 18.62, 13.28, 11.12; HRMS (ESI-positive mode): calcd for C<sub>21</sub>H<sub>35</sub>N<sub>4</sub>O<sub>2</sub>Si ([M]<sup>+</sup>+H<sup>+</sup>) 403.2529; Found: 403.2517.

The crystal suitable for X-Ray study was obtained by slow evaporation of hexane solution of **3aj**.

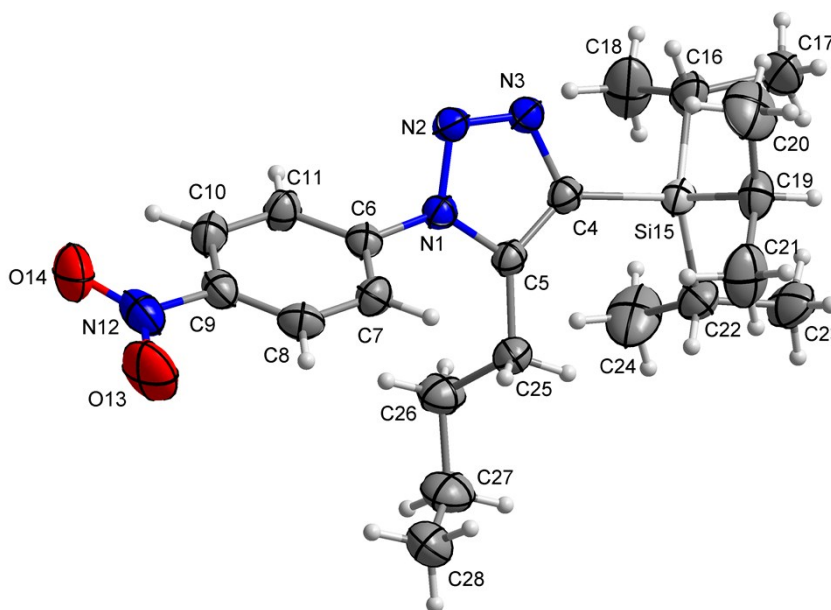

The structure **3aj** (C<sub>21</sub>H<sub>34</sub>N<sub>4</sub>O<sub>2</sub>Si) was measured using D8 VENTURE with multilayer monochromator and a Cu-Kα Incoatec microfocus sealed tube ( $\lambda$  = 1.54178 Å) radiation at 180 K and PHOTON CMOS detector. The structure was in orthorhombic system, *Pbca* space group with lattice parameters *a* = 8.9462 (5) Å, *b* = 11.9145 (6) Å, *c* = 43.549 (2) Å, *Z* = 8, *V* = 4641.8 (4) Å<sup>3</sup>, *D<sub>c</sub>* = 1.152 g cm<sup>-3</sup>,  $\mu$ (Cu-Kα) = 1.07 mm<sup>-1</sup>. The data reduction and absorption correction were done with Apex3 software<sup>14</sup>. The structure was solved by charge flipping methods<sup>15</sup> and refined by full matrix least squares on *F* squared value using Crystals software<sup>16</sup> to final values *R* = 0.058 and *R<sub>w</sub>* = 0.116 using 4237 independent reflections ( $\Theta_{max}$  = 68.3 °), 253 parameters and 0 restraints. The MCE software<sup>17</sup> was used for visualization of electron density maps. According to common practice

the hydrogen atoms attached to carbon atoms were placed geometrically with  $U_{\text{iso}}(\text{H})$  in range 1.2-1.5  $U_{\text{eq}}$  of parent atom (C). The structure was deposited into Cambridge Structural Database under number CCDC 1513615.

The asymmetric unit is formed by one independent molecule of **3aj**. The C–H $\cdots$ O and C–H $\cdots$ N interactions are the driving force of layer formation in the structure, the layers stack in direction of c axis and are held together by London forces. For further information on intermolecular interactions see table 5.

**Table 5 The intermolecular interactions in 3ia (Å, °)**

| Interaction                          | D–H  | H $\cdots$ A | D $\cdots$ A | D–H $\cdots$ A |
|--------------------------------------|------|--------------|--------------|----------------|
| C7–H71 $\cdots$ N2 <sup>i</sup>      | 0.95 | 2.68         | 3.462 (3)    | 140            |
| C7–H71 $\cdots$ N3 <sup>i</sup>      | 0.95 | 2.57         | 3.470 (4)    | 158            |
| C10–H101 $\cdots$ O13 <sup>ii</sup>  | 0.95 | 2.49         | 3.278 (4)    | 141            |
| C28–H282 $\cdots$ O14 <sup>iii</sup> | 0.95 | 2.60         | 3.499 (4)    | 159            |

Symmetry codes: (i)  $-x+1/2, y-1/2, z$  (ii)  $-x+1, y+1/2, -z+3/2$  (iii)  $x-1/2, y, -z+3/2$

### Isolation and characterization of Zn-containing six-membered metallacycle (**Iia**).

The mixture of 2-azido-1,3,5-tribromobenzene **1i** (0.5 mmol, 0.177 g) and phenylacetylene **2a** (2 mmol, 0.204 g, 220  $\mu$ l) in water (10 ml) was vigorously stirred during 2-3 minutes. After the  $\text{Zn}(\text{OAc})_2$  (2 mmol, 0.438 g) were added to reaction mixture. The reaction mixture was stirred until full conversion of 2-azido-1,3,5-tribromobenzene **1i** (TLC, hexane:EtOAc = 7:3). After, the reaction mixture was extracted with  $\text{CH}_2\text{Cl}_2$  (3 $\times$ 20 mL), washed by water, brine and dried with anhydrous  $\text{Na}_2\text{SO}_4$ . The solvent was removed in vacuo to give the crude mixture of **3ia** and **Iia** which was purified by column chromatography (silica gel, eluent hexane:EtOAc = 9:1): 0.114 g of **3ia** (yield

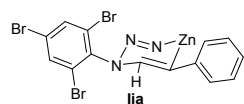

50 %) and 0.134 g of **Iia** (yield 48 %) as a white solid; m.p. = 128–130  $^{\circ}\text{C}$ .  $^1\text{H}$  NMR (400 MHz,  $\text{DMSO}-d_6$ ):  $\delta$  9.00 (s, 1H), 8.31 (s, 2H), 7.94 (d,  $J$  = 7.2 Hz, 2H), 7.52–7.48 (m, 2H), 7.41–7.37 (m, 1H);  $^{13}\text{C}$  NMR (100 MHz,  $\text{DMSO}-d_6$ ):  $\delta$  147.25, 135.50, 130.33, 129.57, 128.90, 125.87, 125.76, 123.94, 123.82. HRMS (ESI-positive mode): calcd for  $\text{C}_{16}\text{H}_{11}^{79}\text{Br}_3\text{N}_4\text{Zn}$  ( $\text{M}+\text{MeCN}$ ) 562.7702, Found 562.7745; calcd for  $\text{C}_{16}\text{H}_{11}^{81}\text{Br}_3\text{N}_4\text{Zn}$  ( $[\text{M}]+\text{MeCN}$ ) 564.7665, Found 564.7729.  $\text{C}_{16}\text{H}_{11}^{79}\text{Br}_3\text{N}_4\text{Zn}$  ( $[\text{M}]+\text{MeCN}$ ).

### The decomposition of intermediate **Iia** in acetone solution.

The solution of intermediate **Iia** (0.25 mmol, 0.134 g) in acetone was refluxed during 12 h until full conversion of intermediate **Iia**. After that, the cloudy solution was filtered through the silica pad and solvent was removed in vacuo to give the 0.115 g (100% yield) of **3ia** as a white solid; m.p. = 140–142  $^{\circ}\text{C}$ .

Fig. S1– GC-MS analysis Zn-containing six-membered metallacycle **Iia**

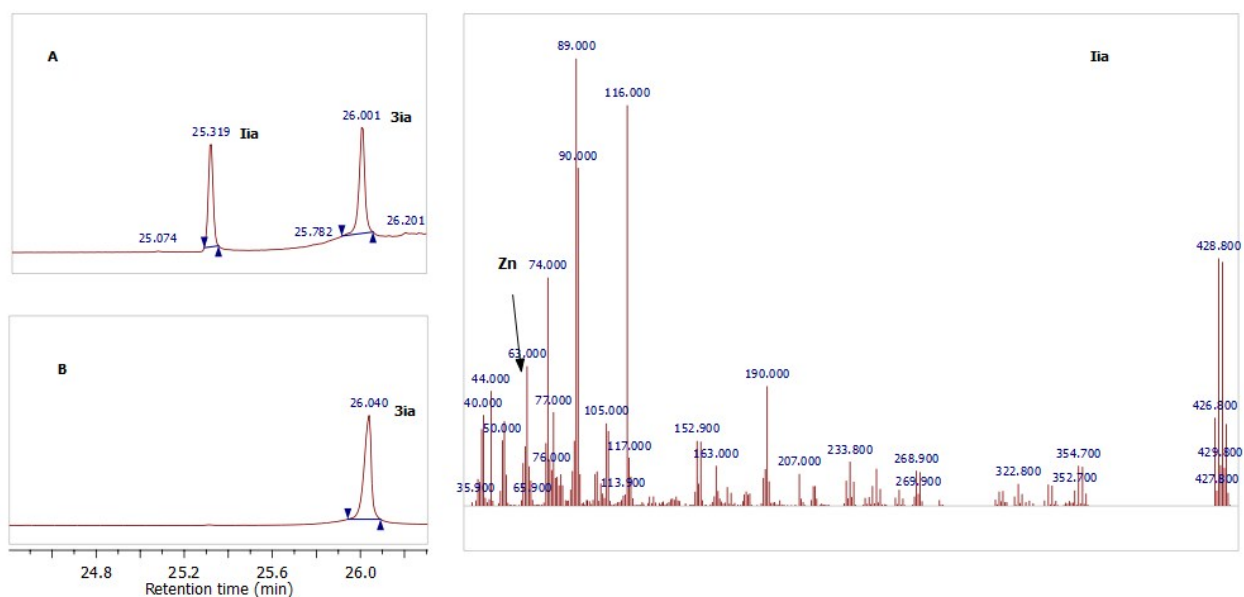

Fig. S2. The high resolution mass-spectrum of intermediate **IIa**.

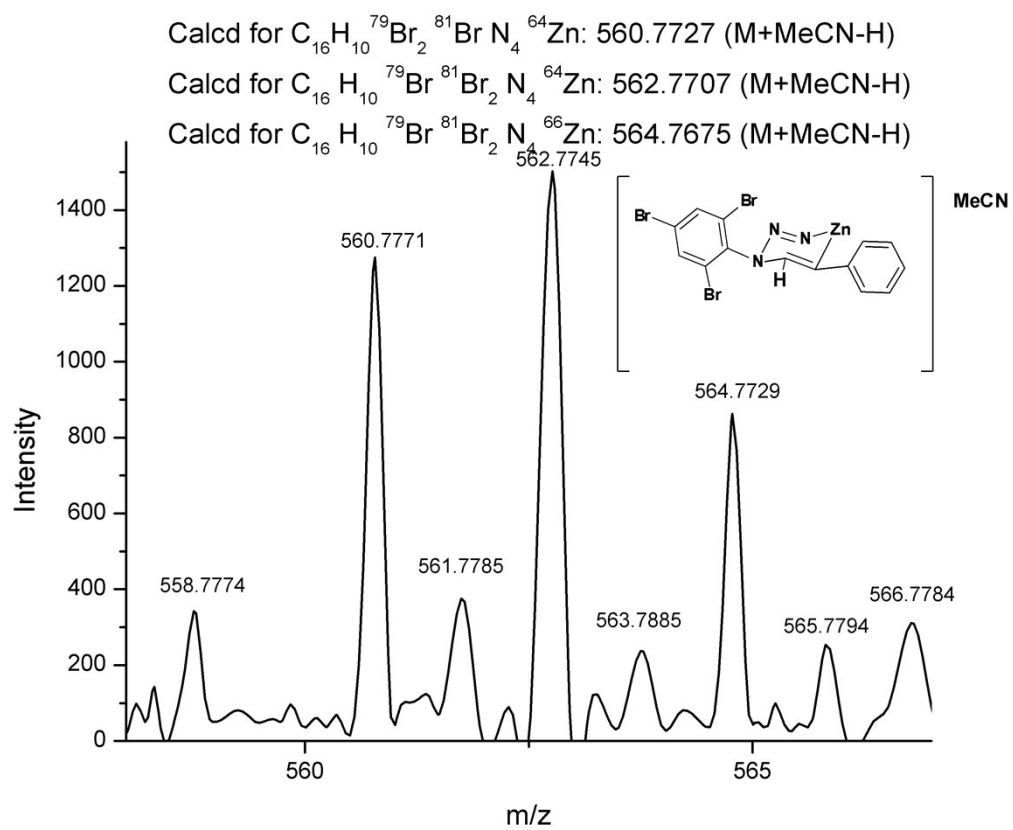

Fig. S3 –  $^1\text{H}$  NMR (400 MHz,  $\text{DMSO-d}_6$ ) spectrum of Zn-containing six-membered metallacycle **IIa**.

$^1\text{H}$  NMR (400 MHz,  $\text{DMSO-d}_6$ )

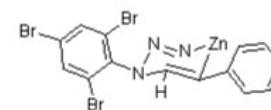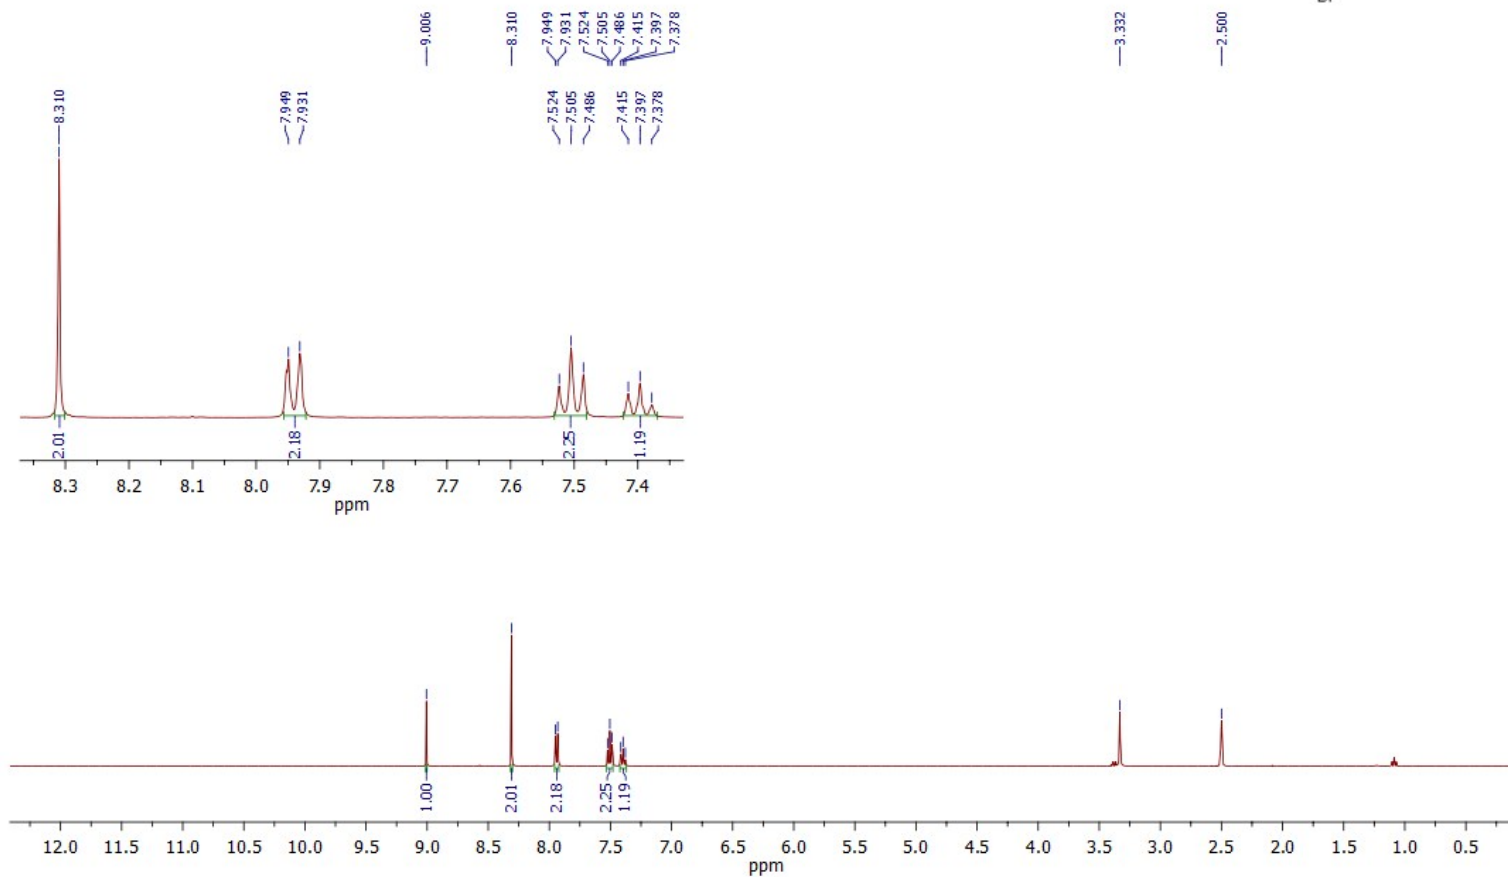

Fig. S4 –  $^{13}\text{C}$  NMR (100 MHz,  $\text{DMSO-d}_6$ ) spectrum of Zn-containing six-membered metallacycle **Iia**.

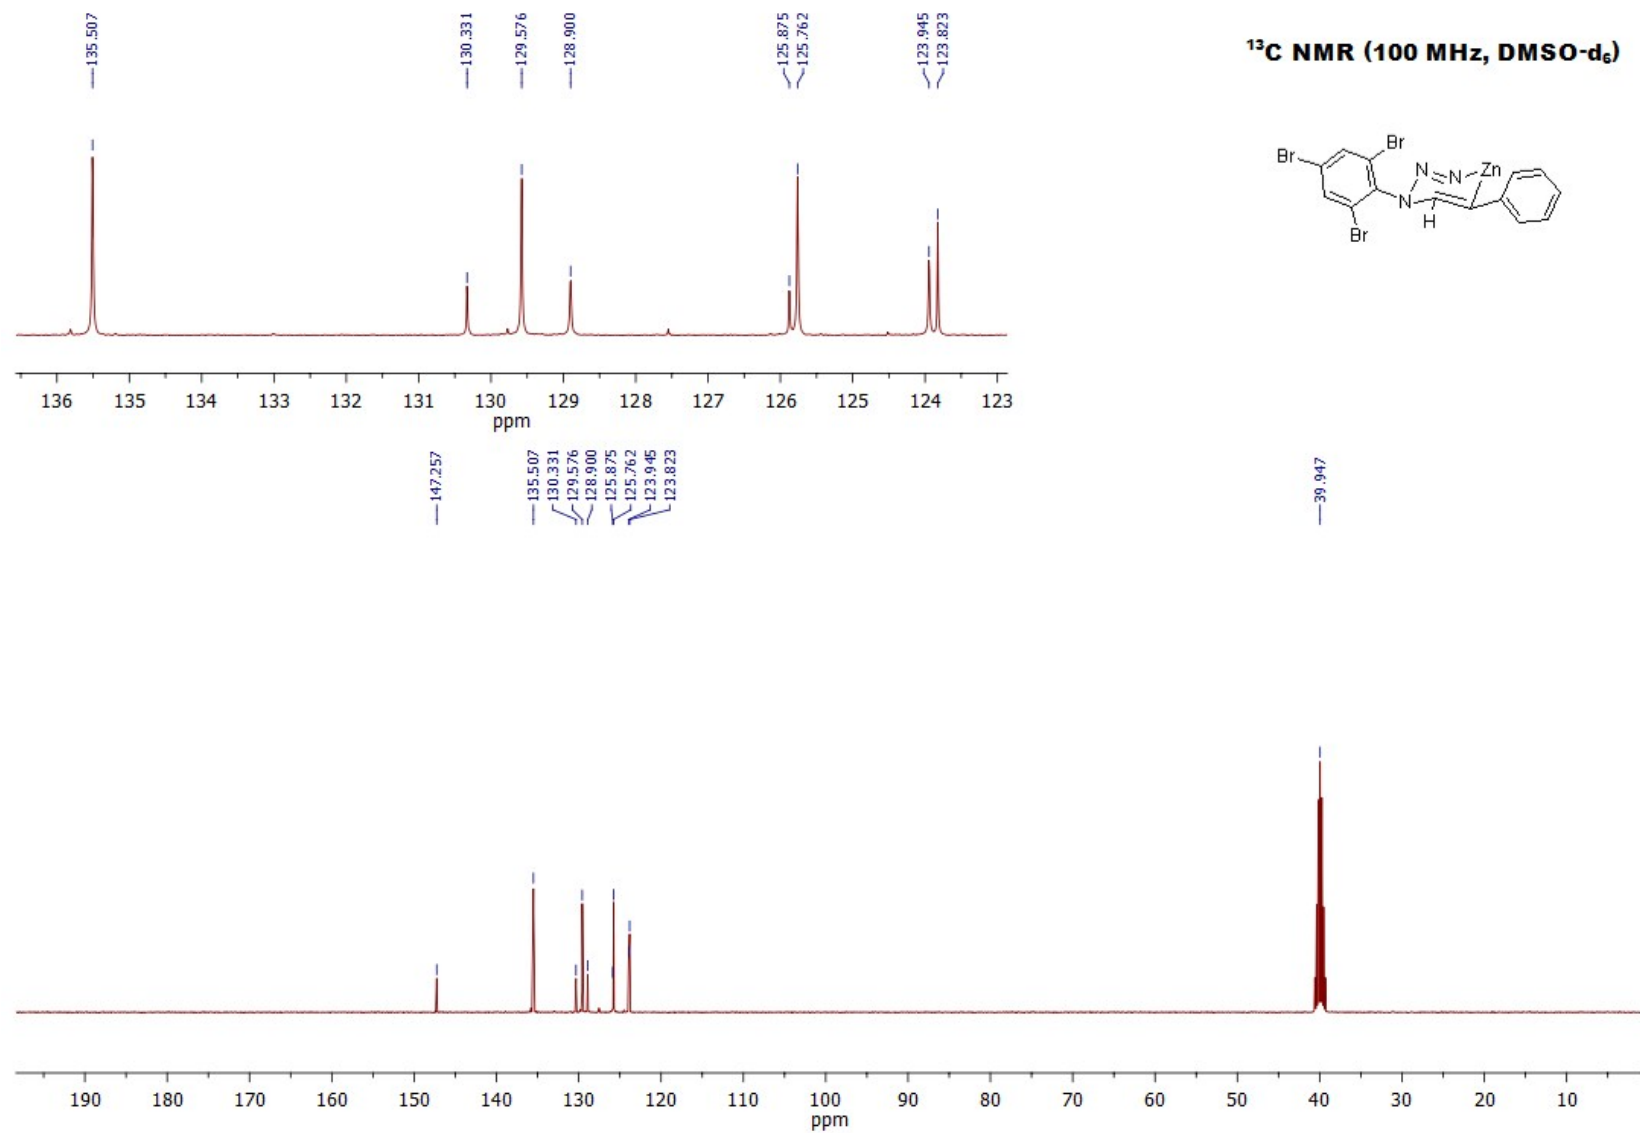



Fig. S5 – HMBC NMR (400 MHz, DMSO-d<sub>6</sub>) spectrum of Zn-containing six-membered metallacycle **Iia**.

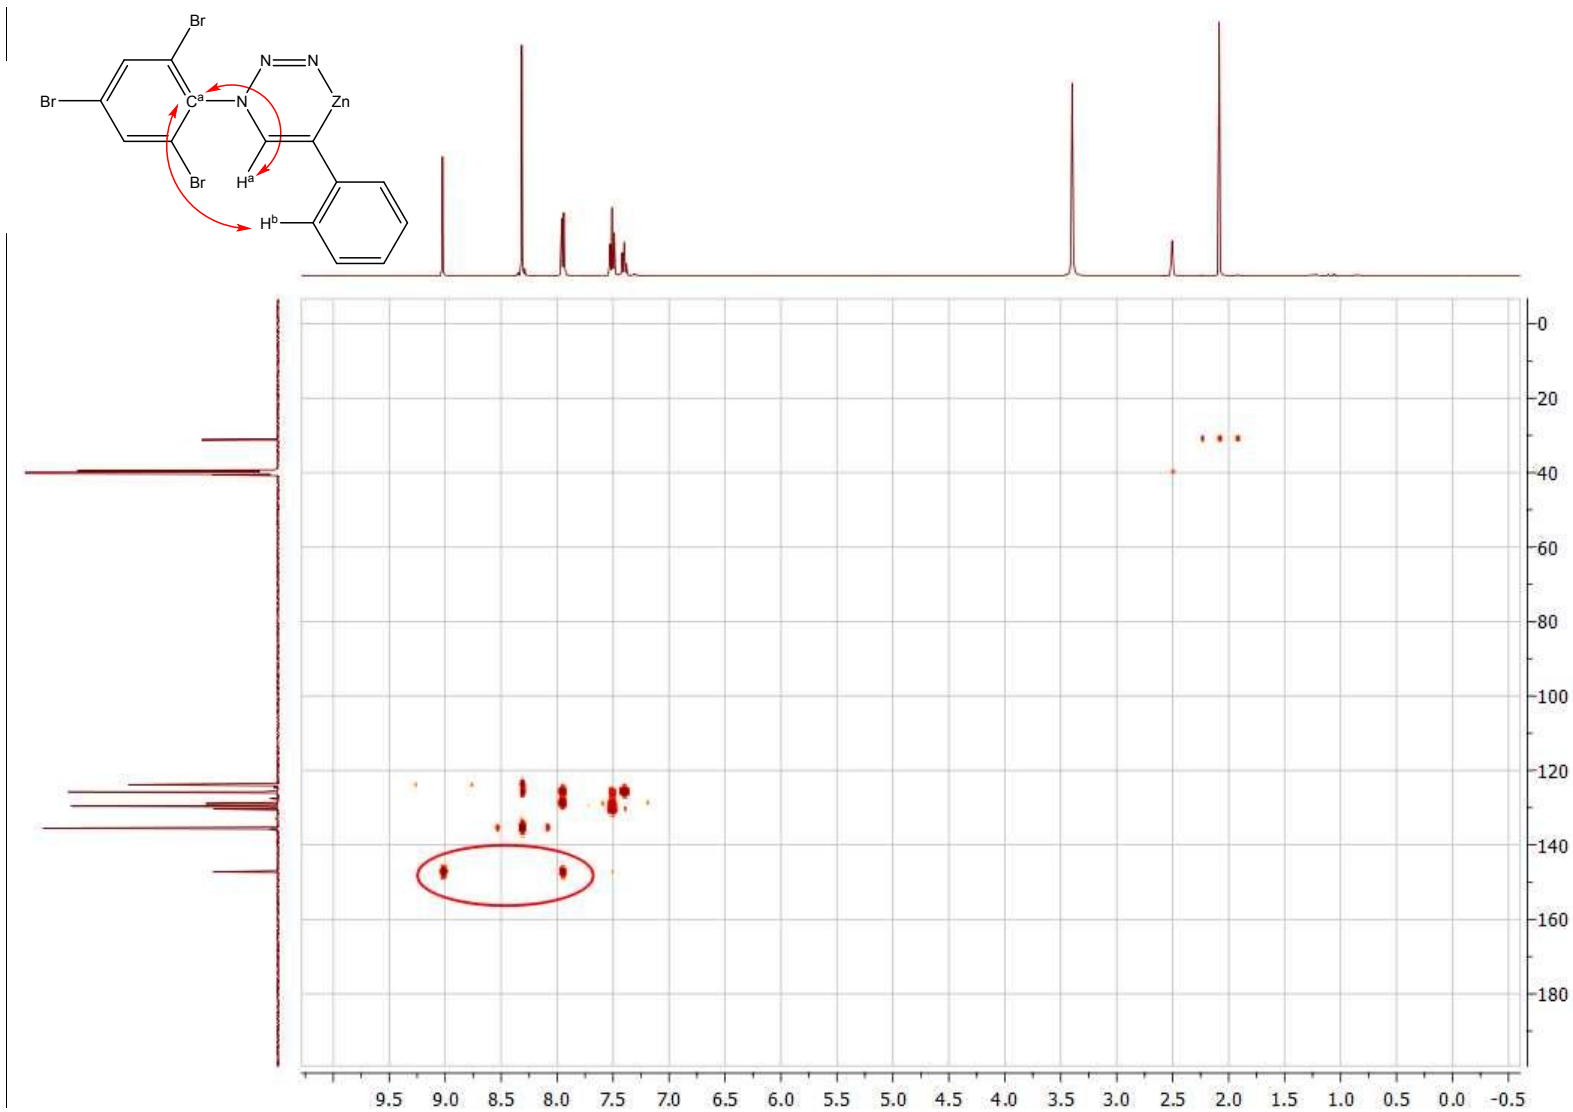

Fig. S6. The comparison of  $^1\text{H}$  NMR spectra intermediate **1ia**, 1,2,3-triazole **3ia** and mixture azide **1i** with alkyne **2a**

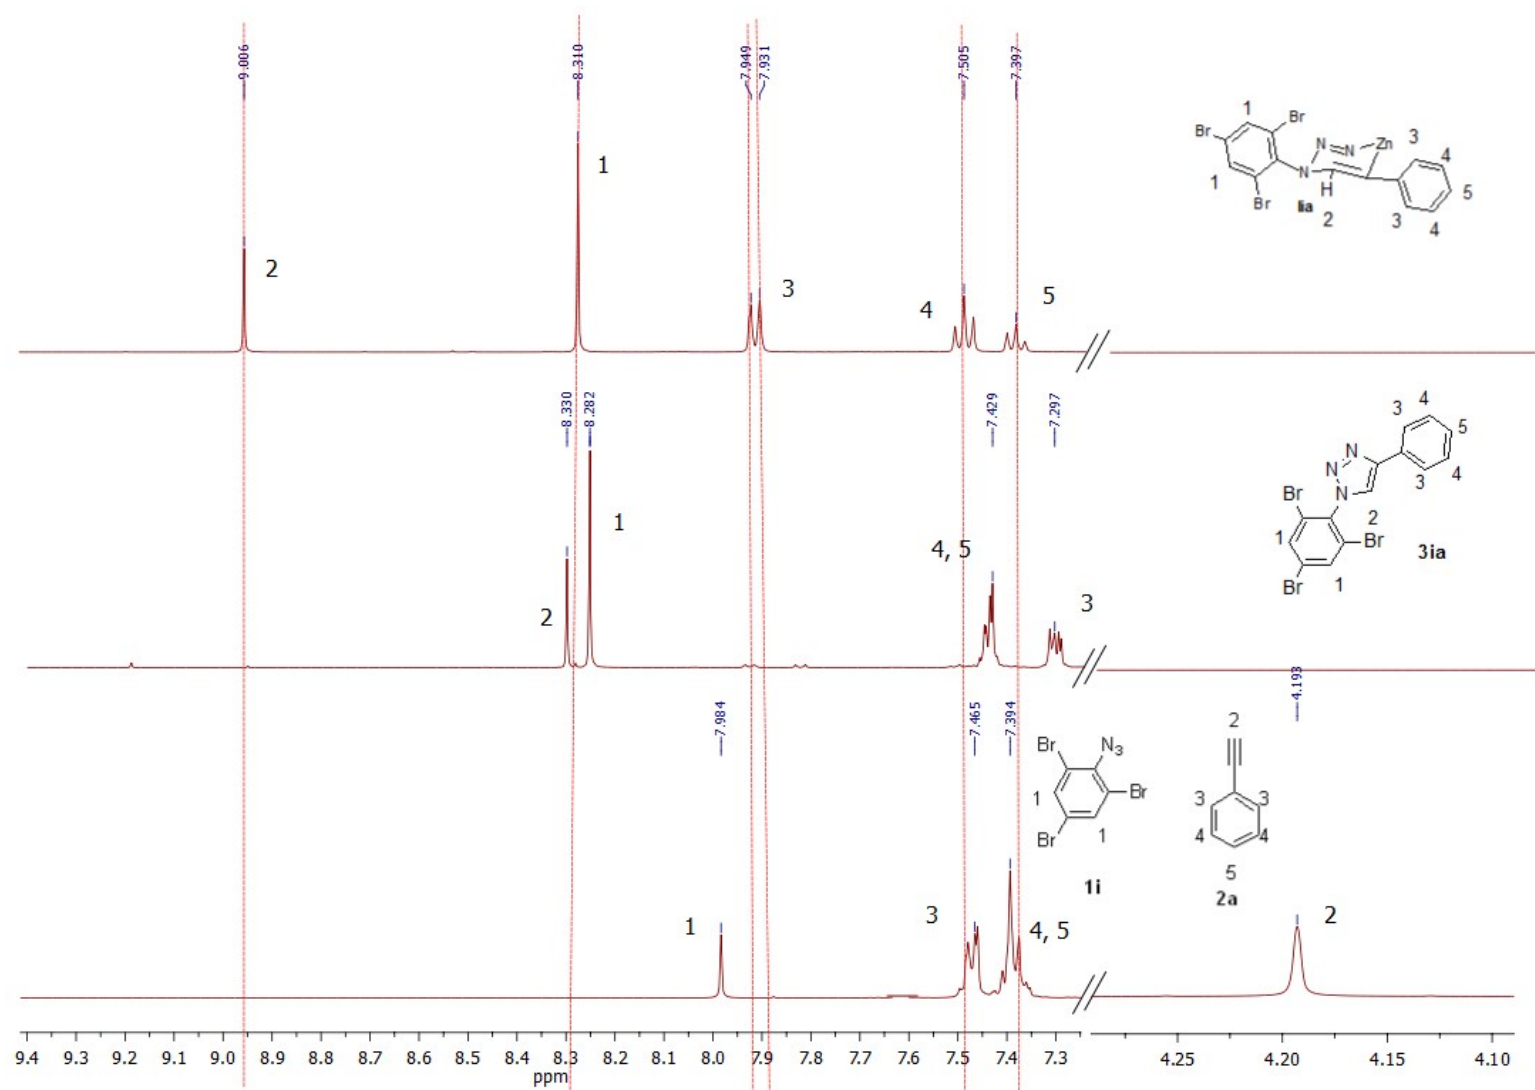

Fig. S7 – The comparison of  $^{13}\text{C}$  NMR spectra Zn-containing six-membered metallacycle **1ia**, 1,2,3-triazole **3ia** and mixture azide **1i** with alkyne **2a**

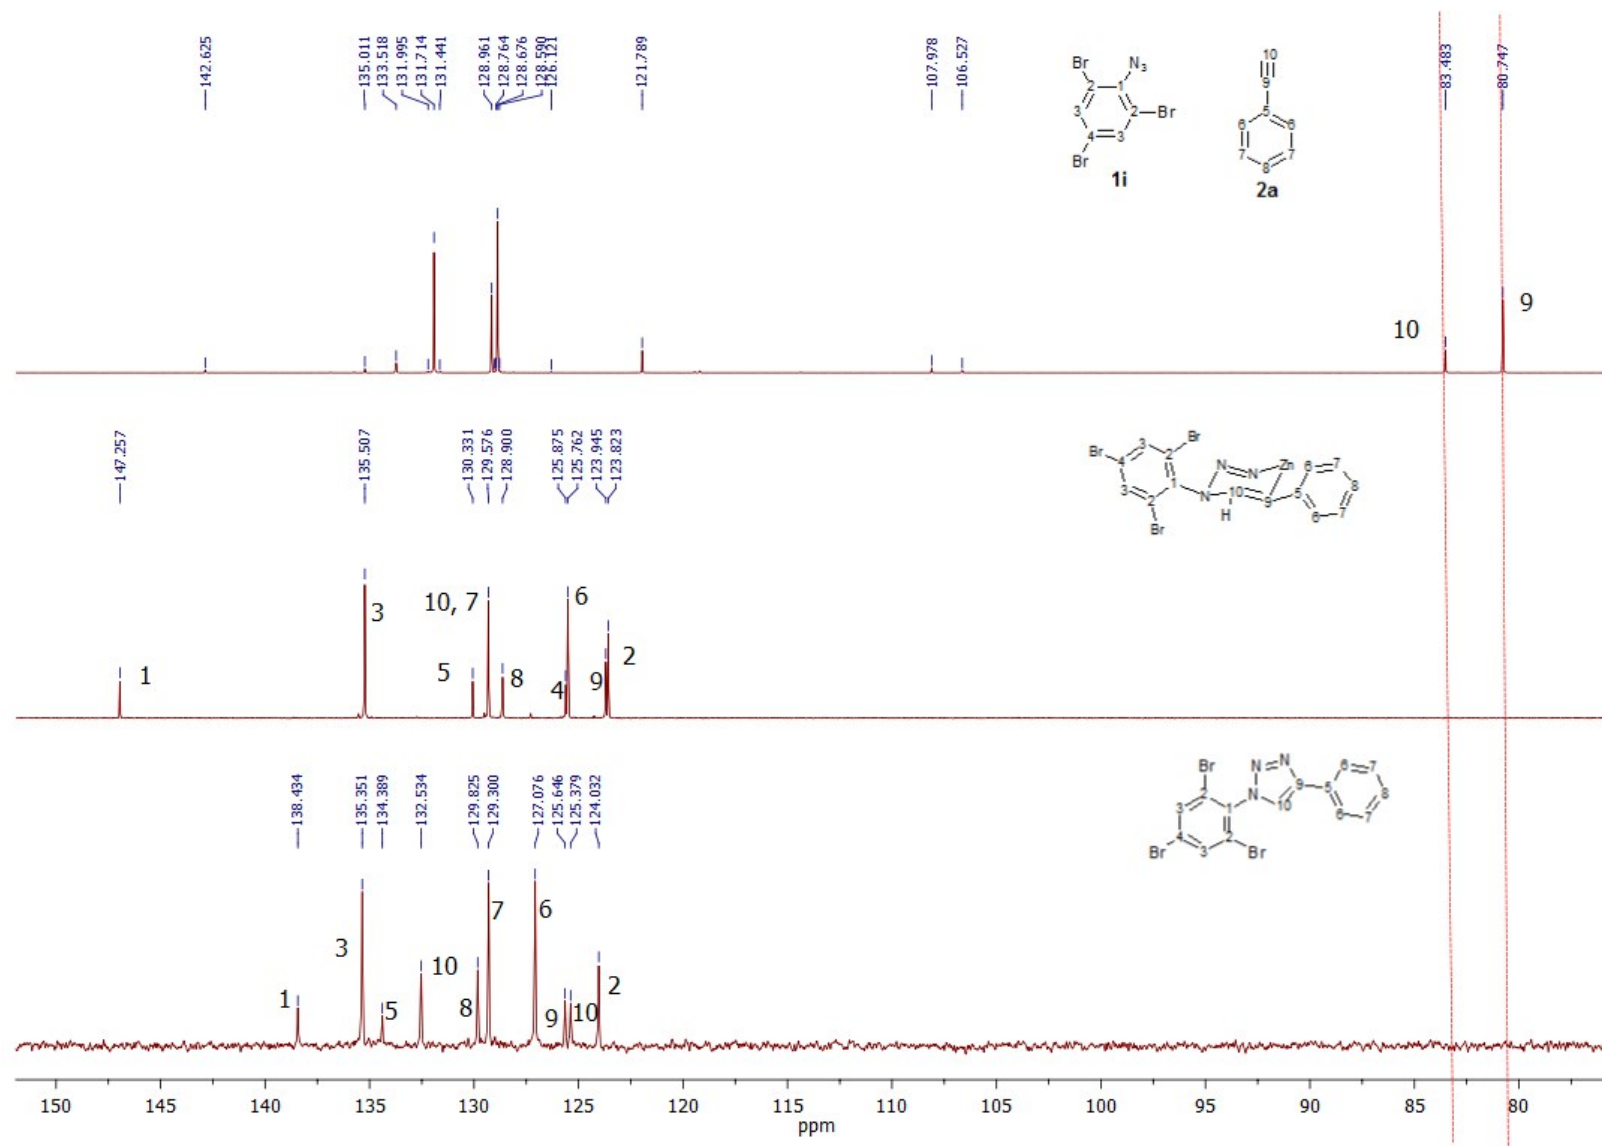

## Spectra $^1\text{H}$ , $^{13}\text{C}$ NMR of products

$^1\text{H}$  NMR (400 MHz,  $\text{DMSO-d}_6$ ) spectrum of 1-(4-nitrophenyl)-4-phenyl-1*H*-1,2,3-triazole (**3aa**).

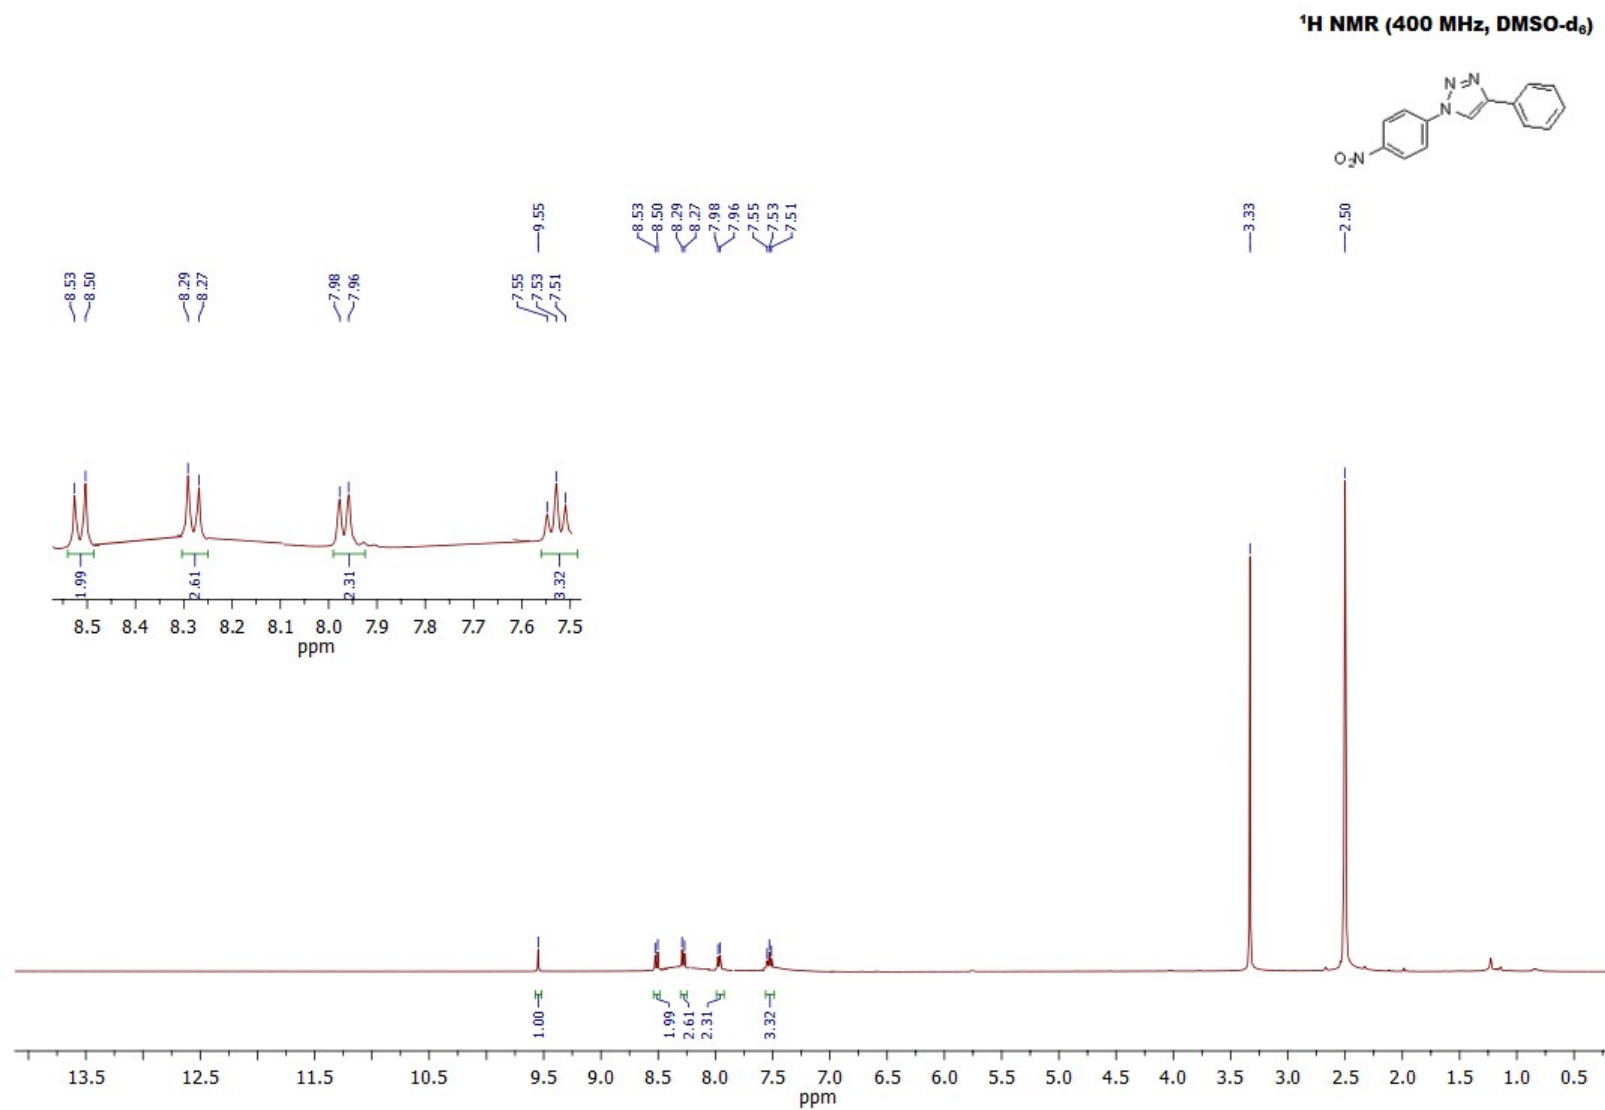

$^{13}\text{C}$  NMR (100 MHz, DMSO- $\text{d}_6$ ) spectrum of 1-(4-nitrophenyl)-4-phenyl-1*H*-1,2,3-triazole (**3aa**)

$^{13}\text{C}$  NMR (100 MHz, DMSO- $\text{d}_6$ )

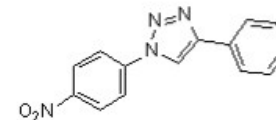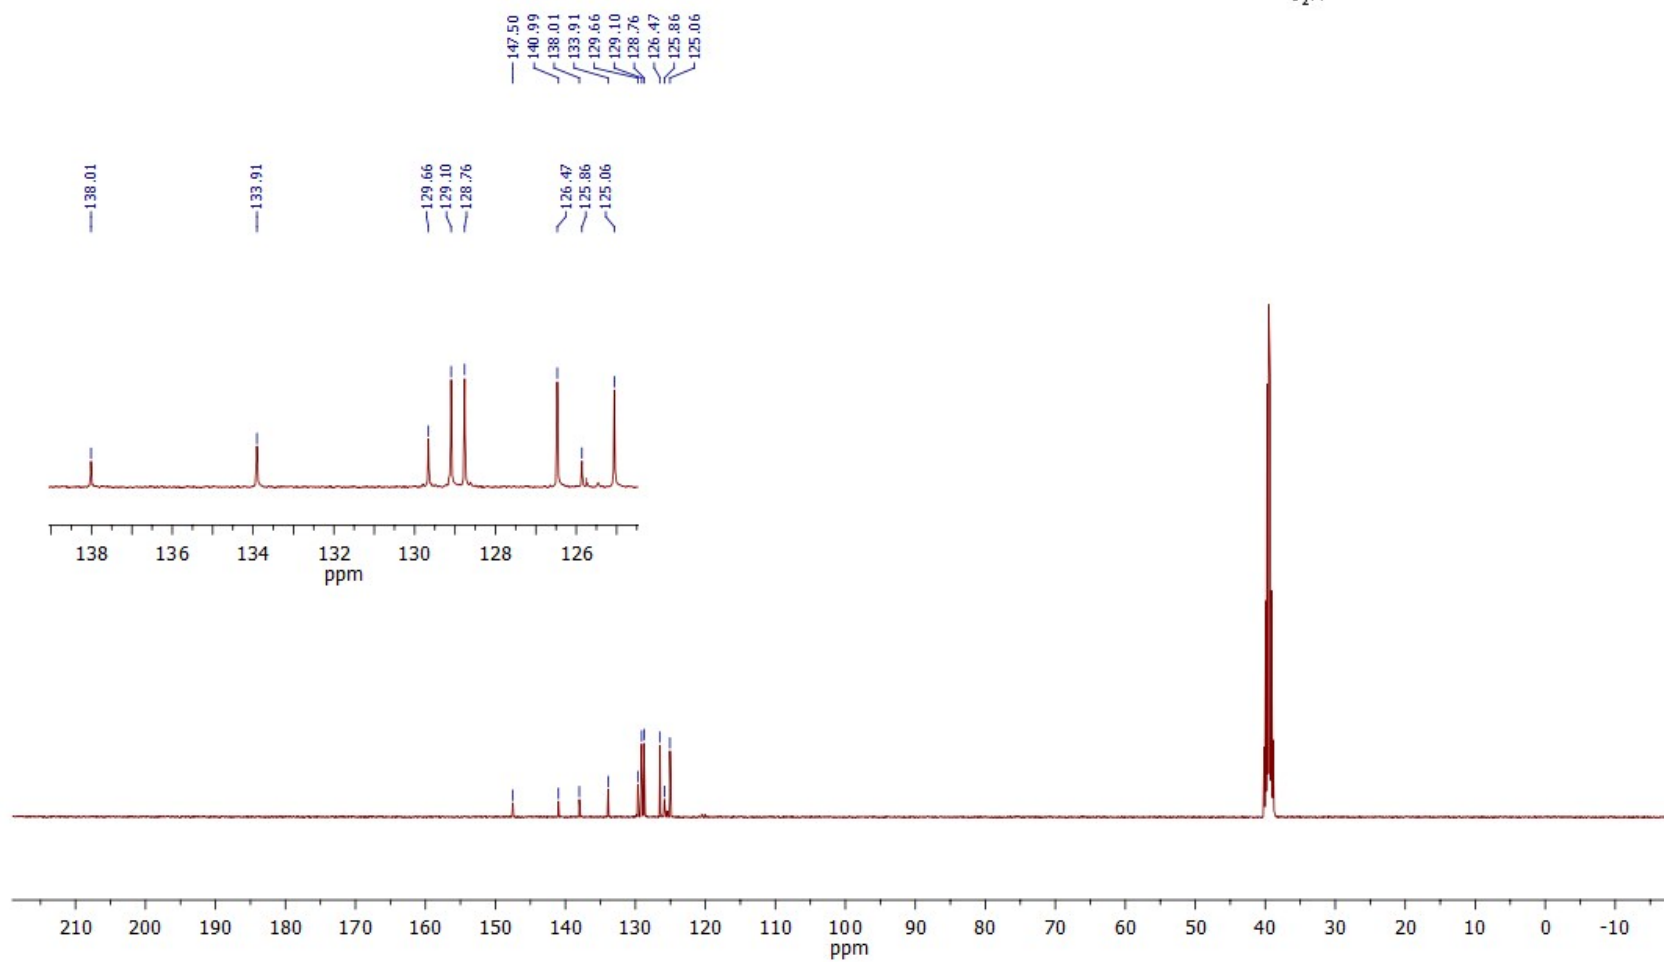

O=[N+]([O-])c1ccc(cc1)-c2nn(c3ccccc23)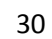

$^{13}\text{C}$  NMR (100 MHz,  $\text{DMSO-d}_6$ ) spectrum of 1-(3-nitrophenyl)-4-phenyl-1*H*-1,2,3-triazole (**3ba**).

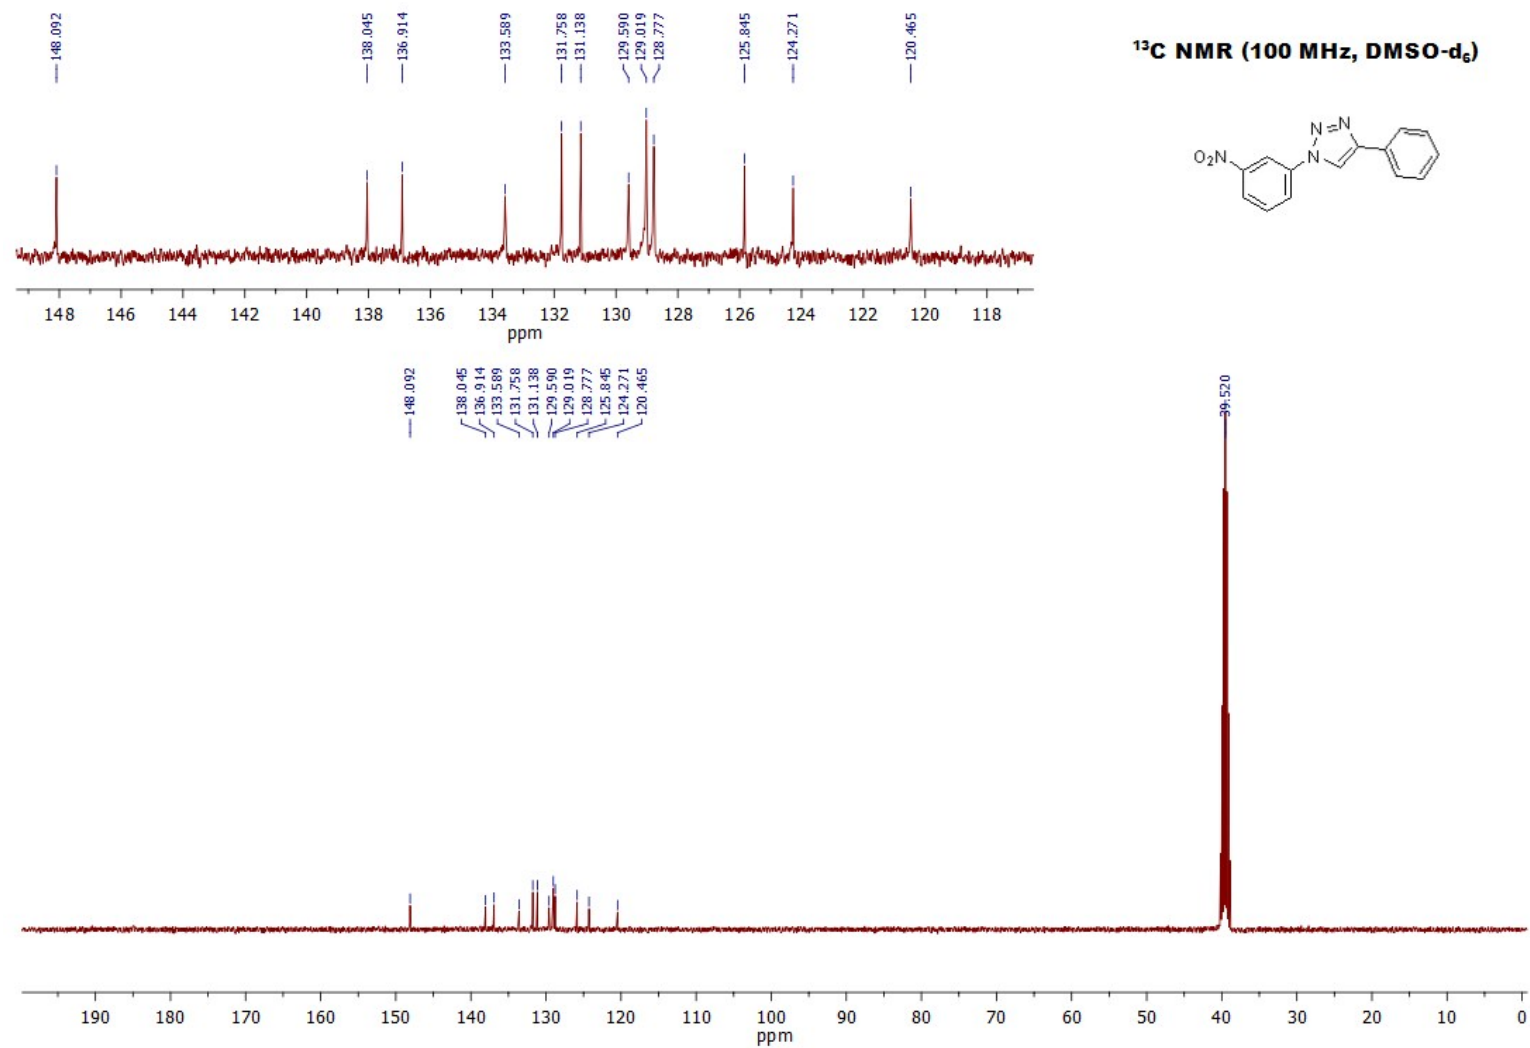

$^1\text{H}$  NMR (400 MHz,  $\text{DMSO-d}_6$ ) spectrum of 4-(4-phenyl-1*H*-1,2,3-triazol-1-yl)benzonitrile (**3ca**).

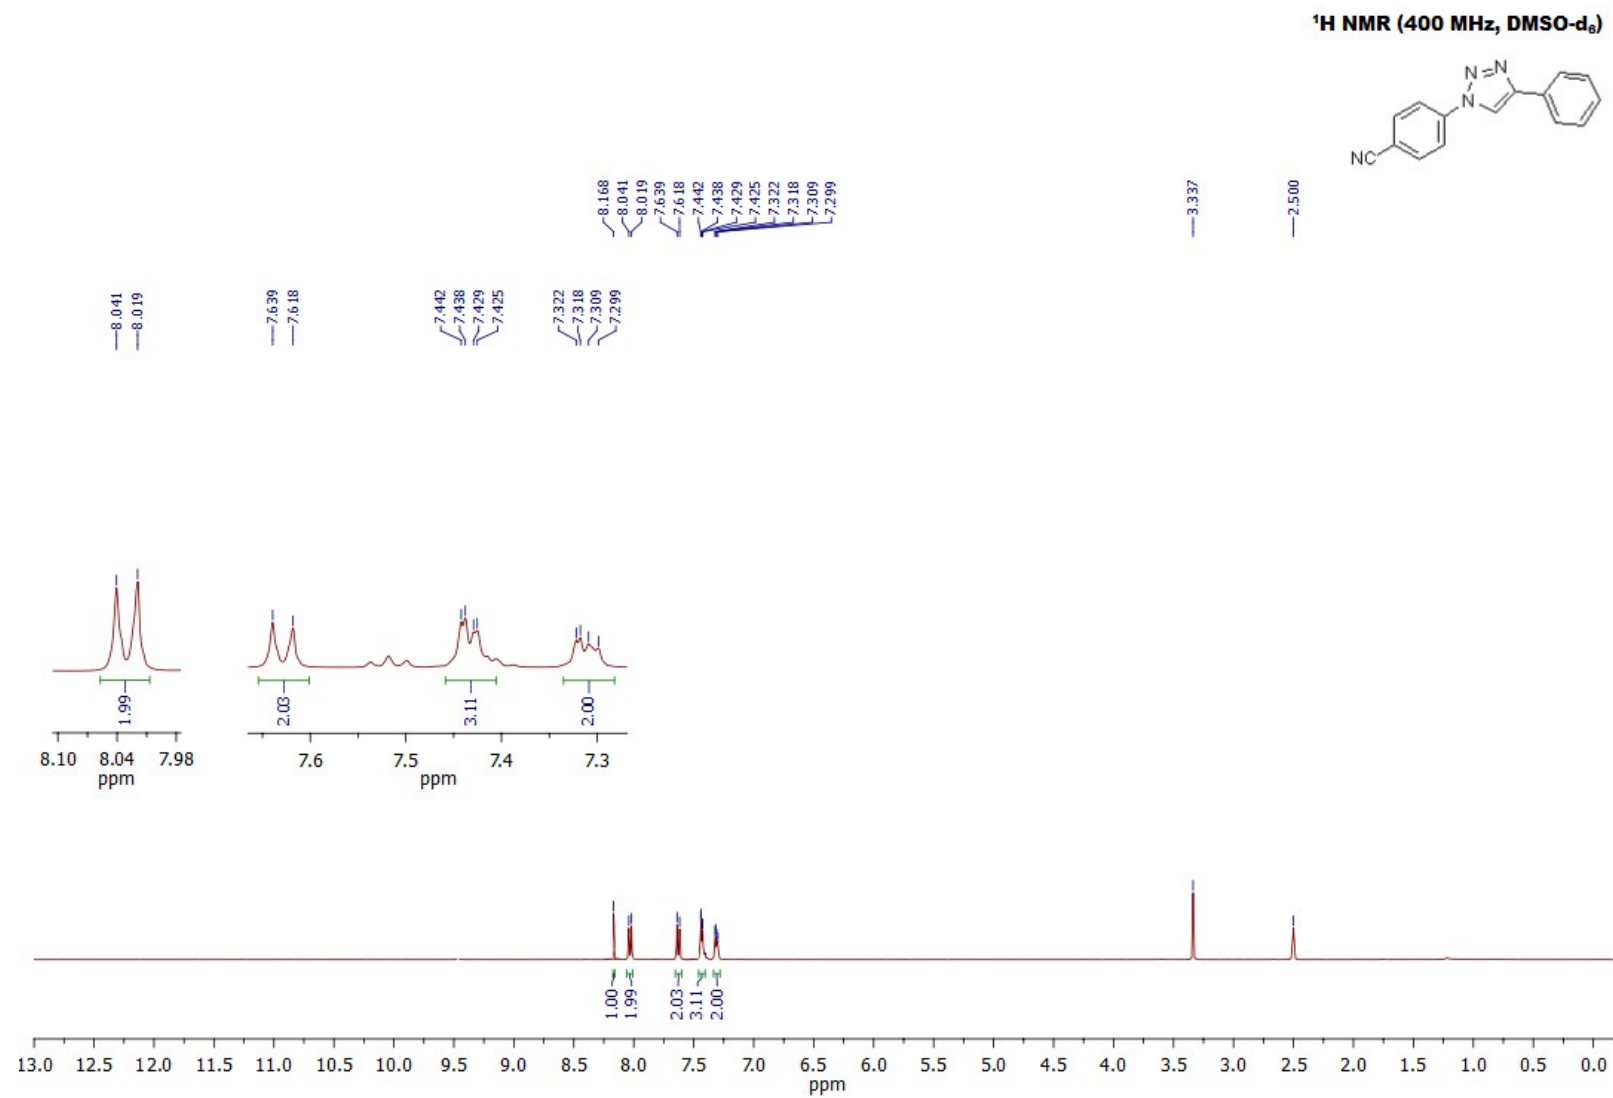



$^{13}\text{C}$  NMR (100 MHz, DMSO- $\text{d}_6$ ) spectrum of 4-(4-phenyl-1*H*-1,2,3-triazol-1-yl)benzonitrile (**3ca**).

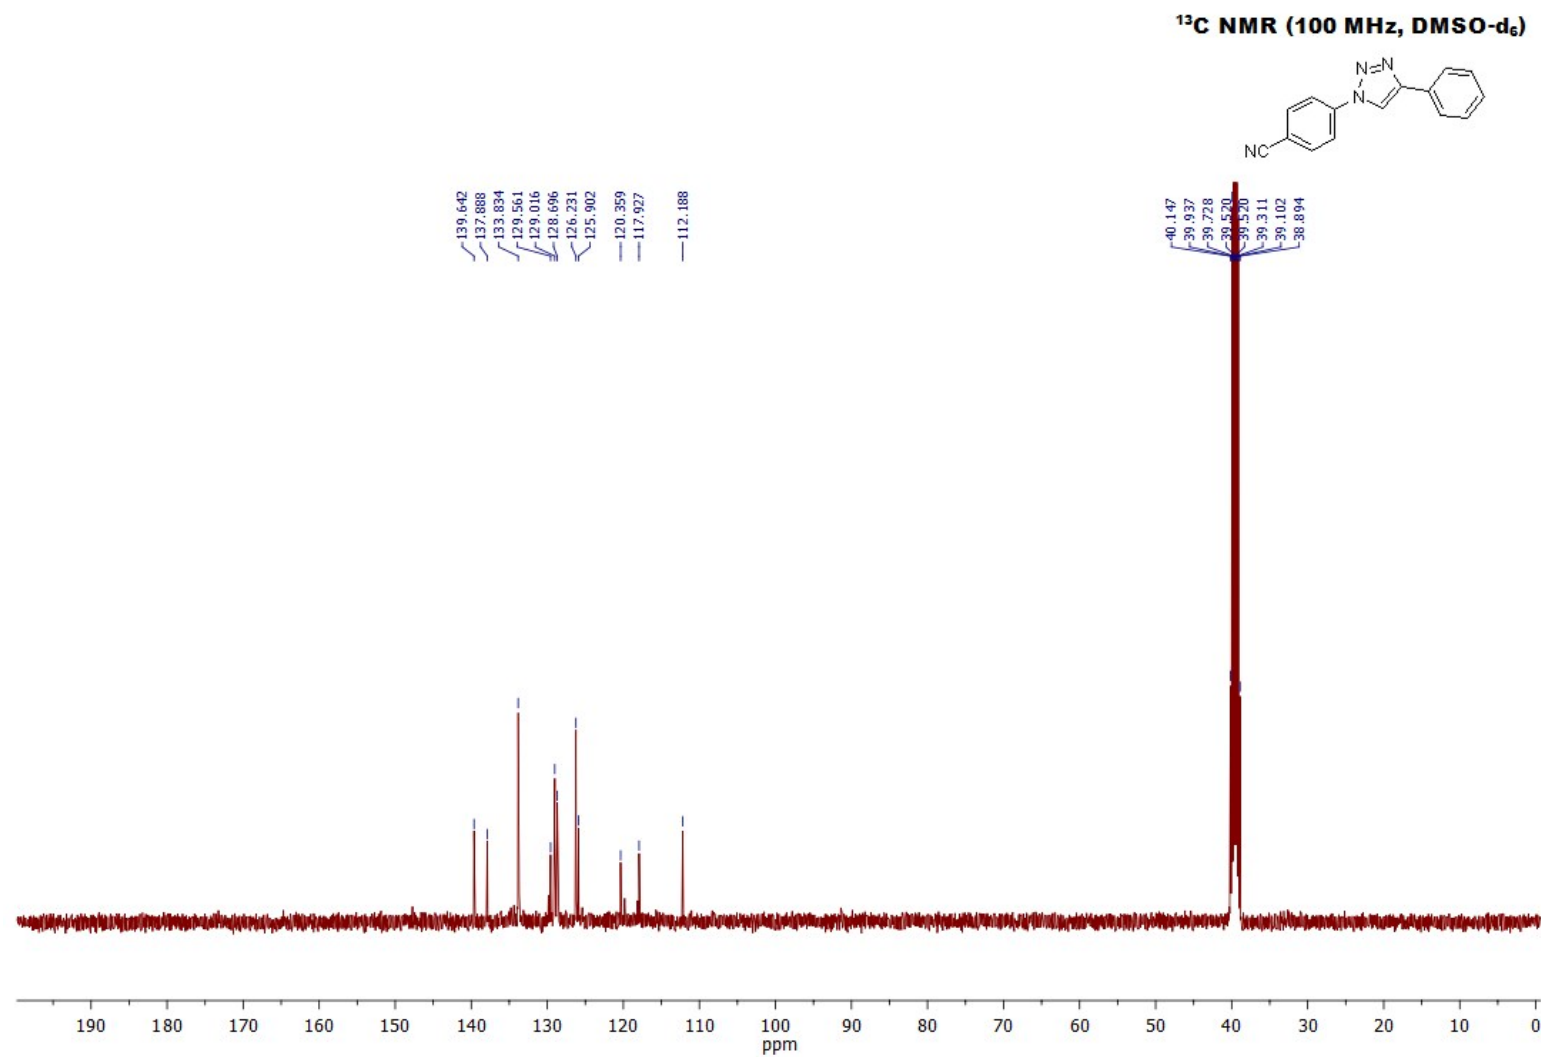

$^1\text{H}$  NMR (400 MHz,  $\text{DMSO-d}_6$ ) spectrum of (4-phenyl-1-(p-tolyl)-1*H*-1,2,3-triazole) (**3da**).

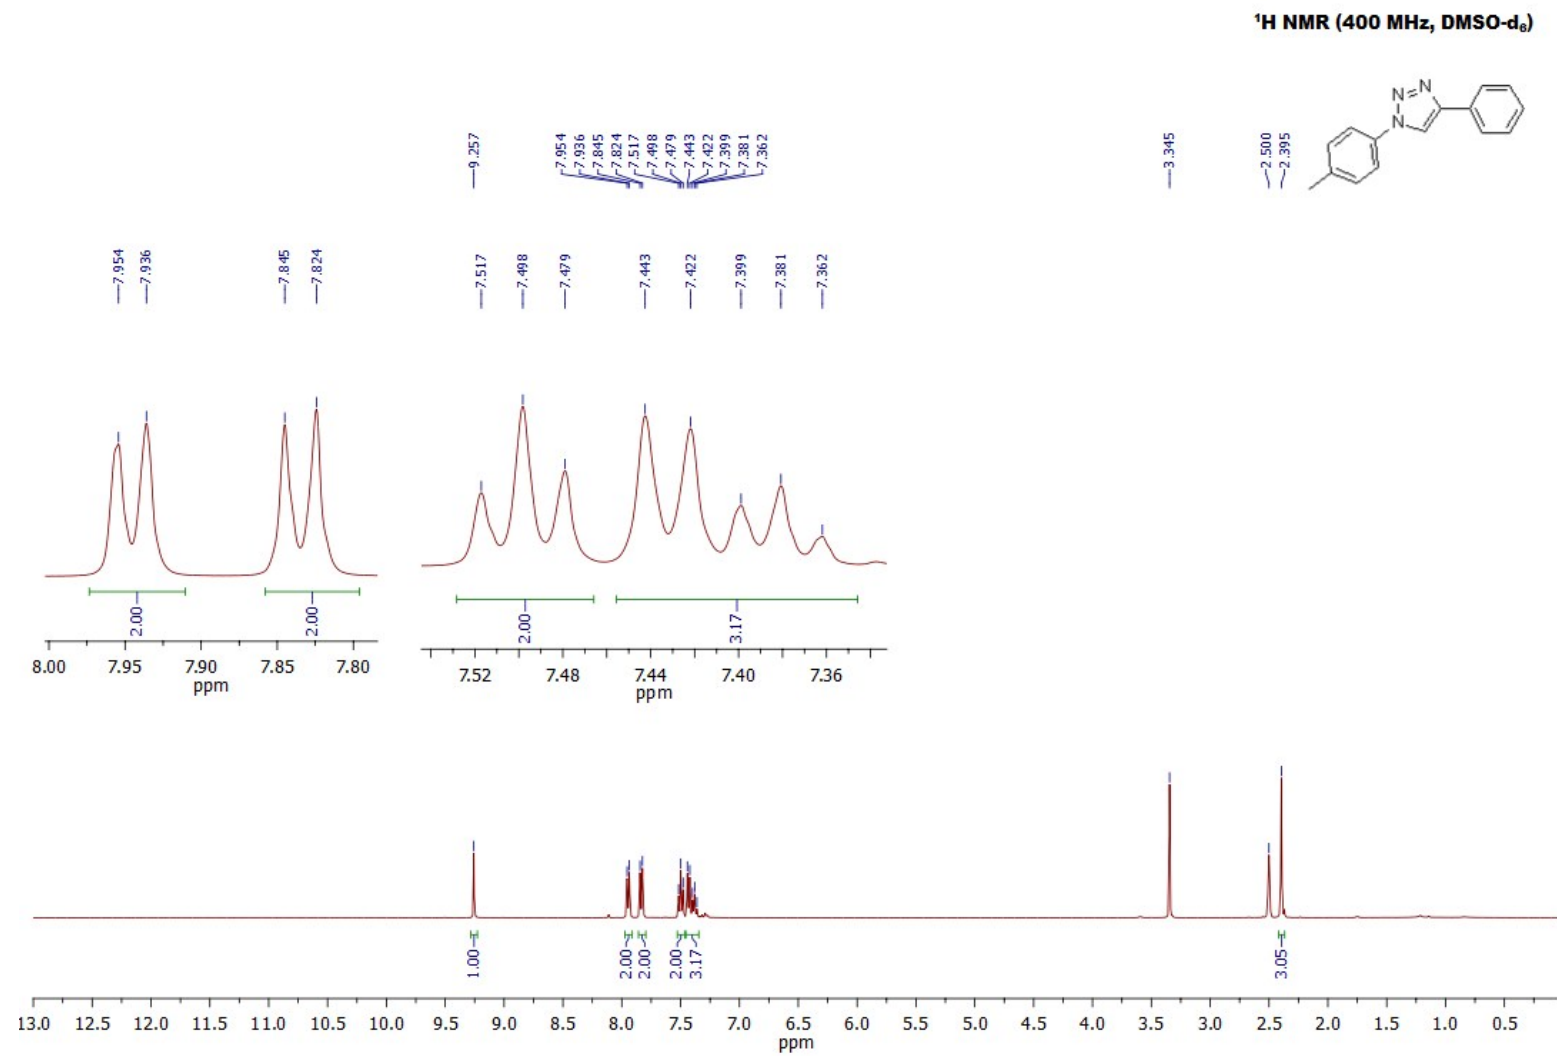

$^{13}\text{C}$  NMR (100 MHz,  $\text{DMSO-d}_6$ ) spectrum of (4-phenyl-1-(p-tolyl)-1H-1,2,3-triazole) (**3da**).

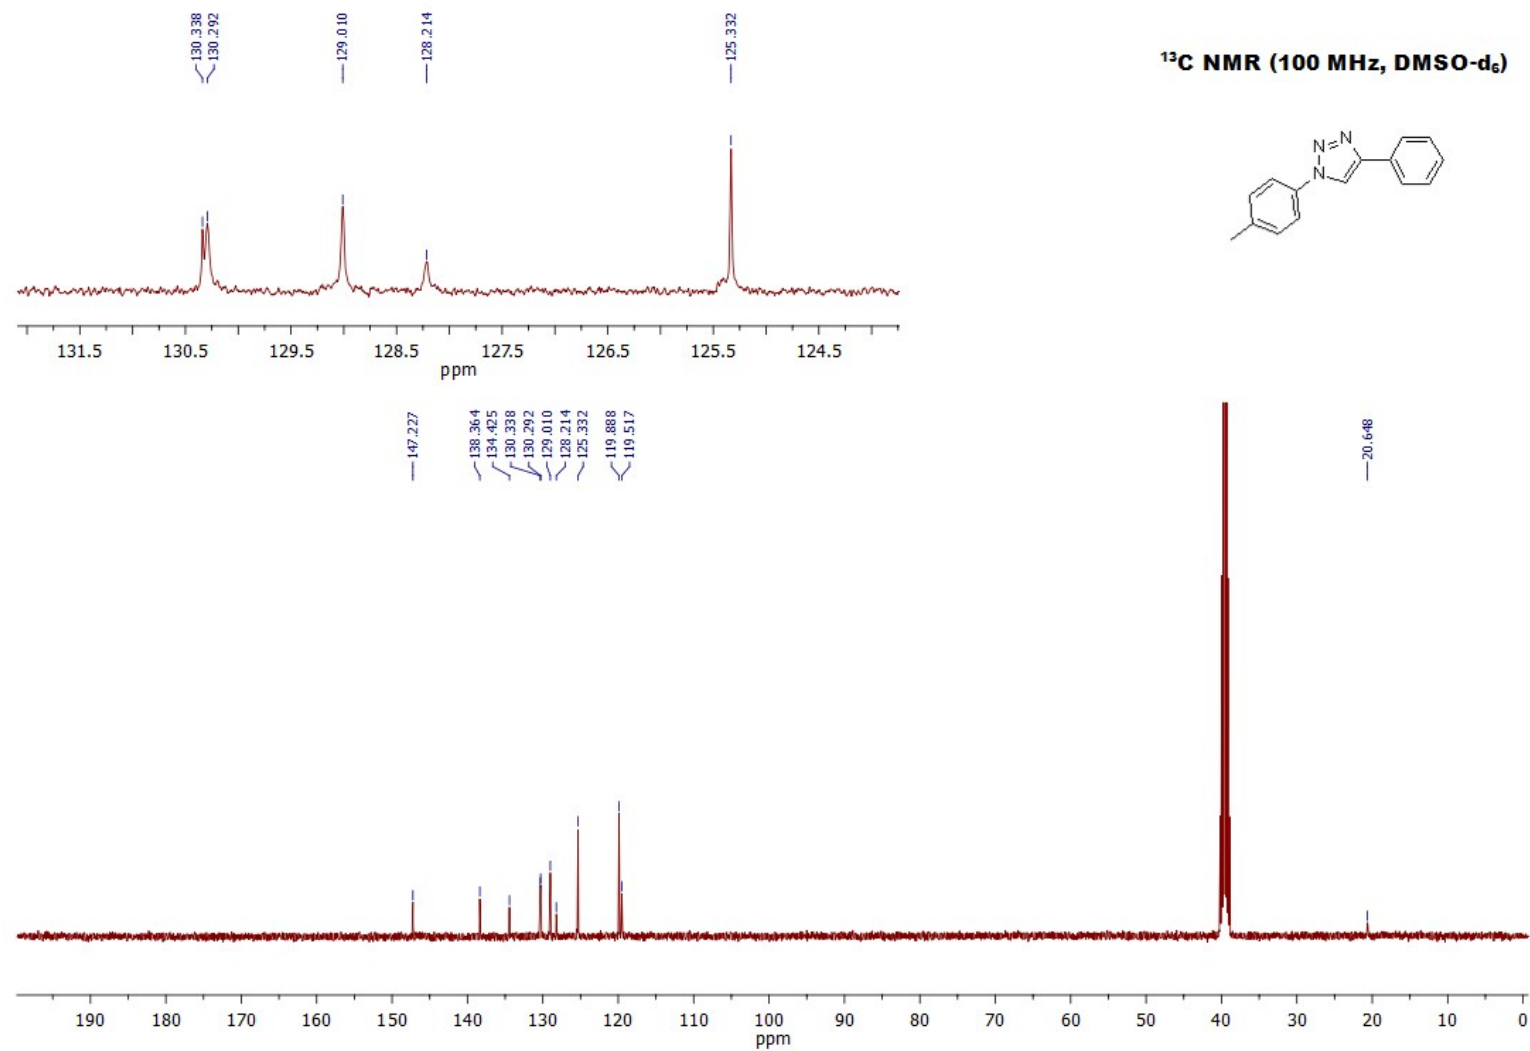

$^1\text{H}$  NMR (400 MHz,  $\text{DMSO-d}_6$ ) spectrum of 4-phenyl-1-(o-tolyl)-1*H*-1,2,3-triazole (**3ea**).

$^1\text{H}$  NMR (400 MHz,  $\text{DMSO-d}_6$ )

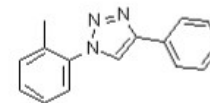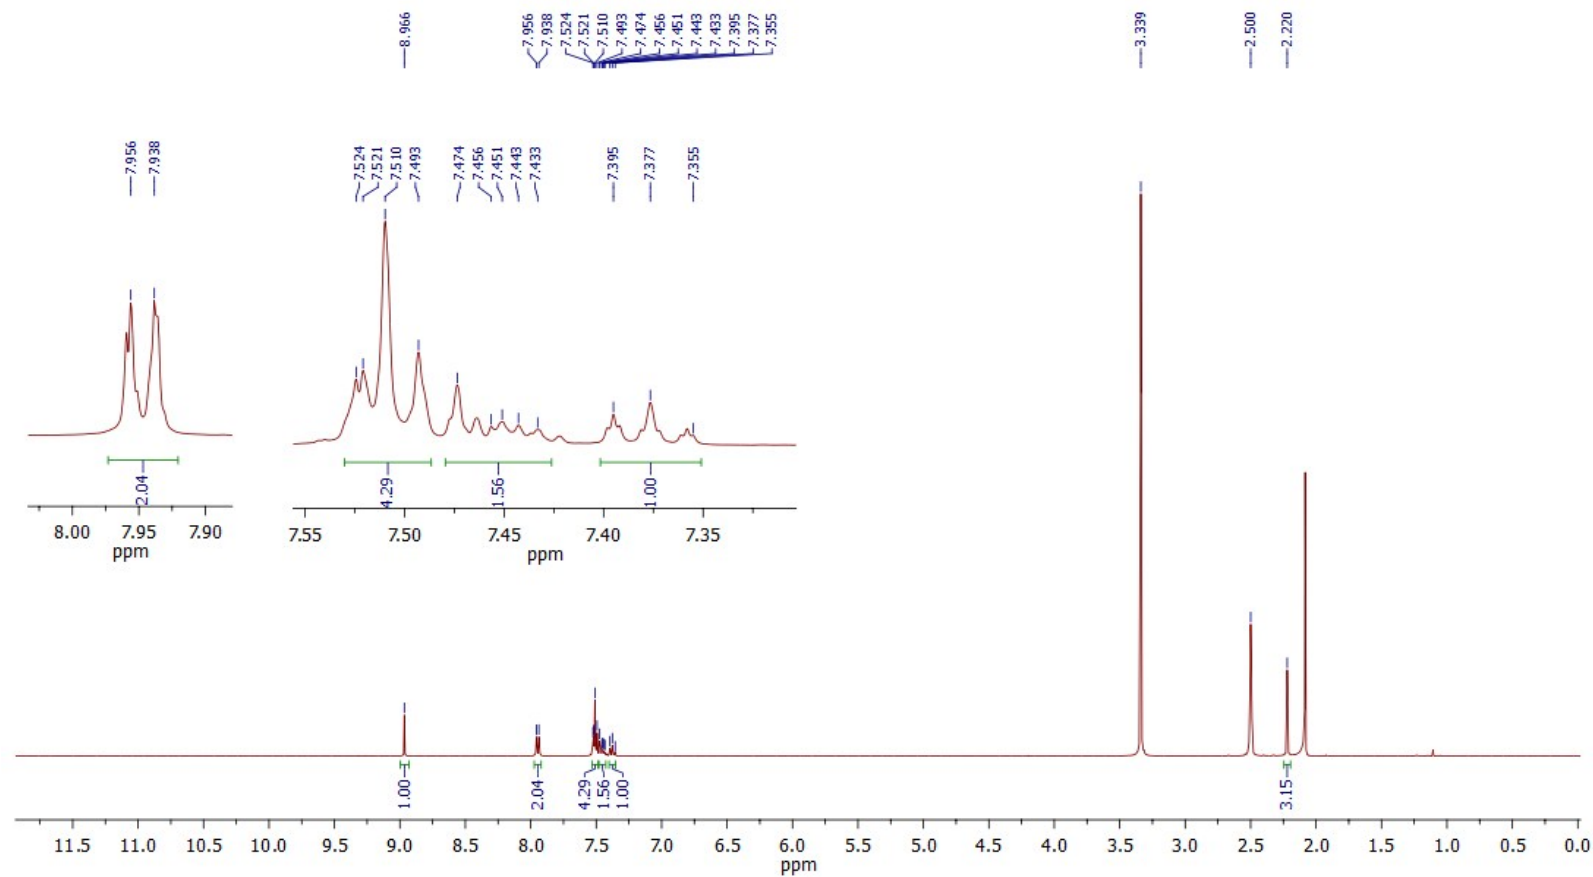

$^{13}\text{C}$  NMR (100 MHz,  $\text{DMSO-d}_6$ ) spectrum of 4-phenyl-1-(o-tolyl)-1*H*-1,2,3-triazole (**3ea**).

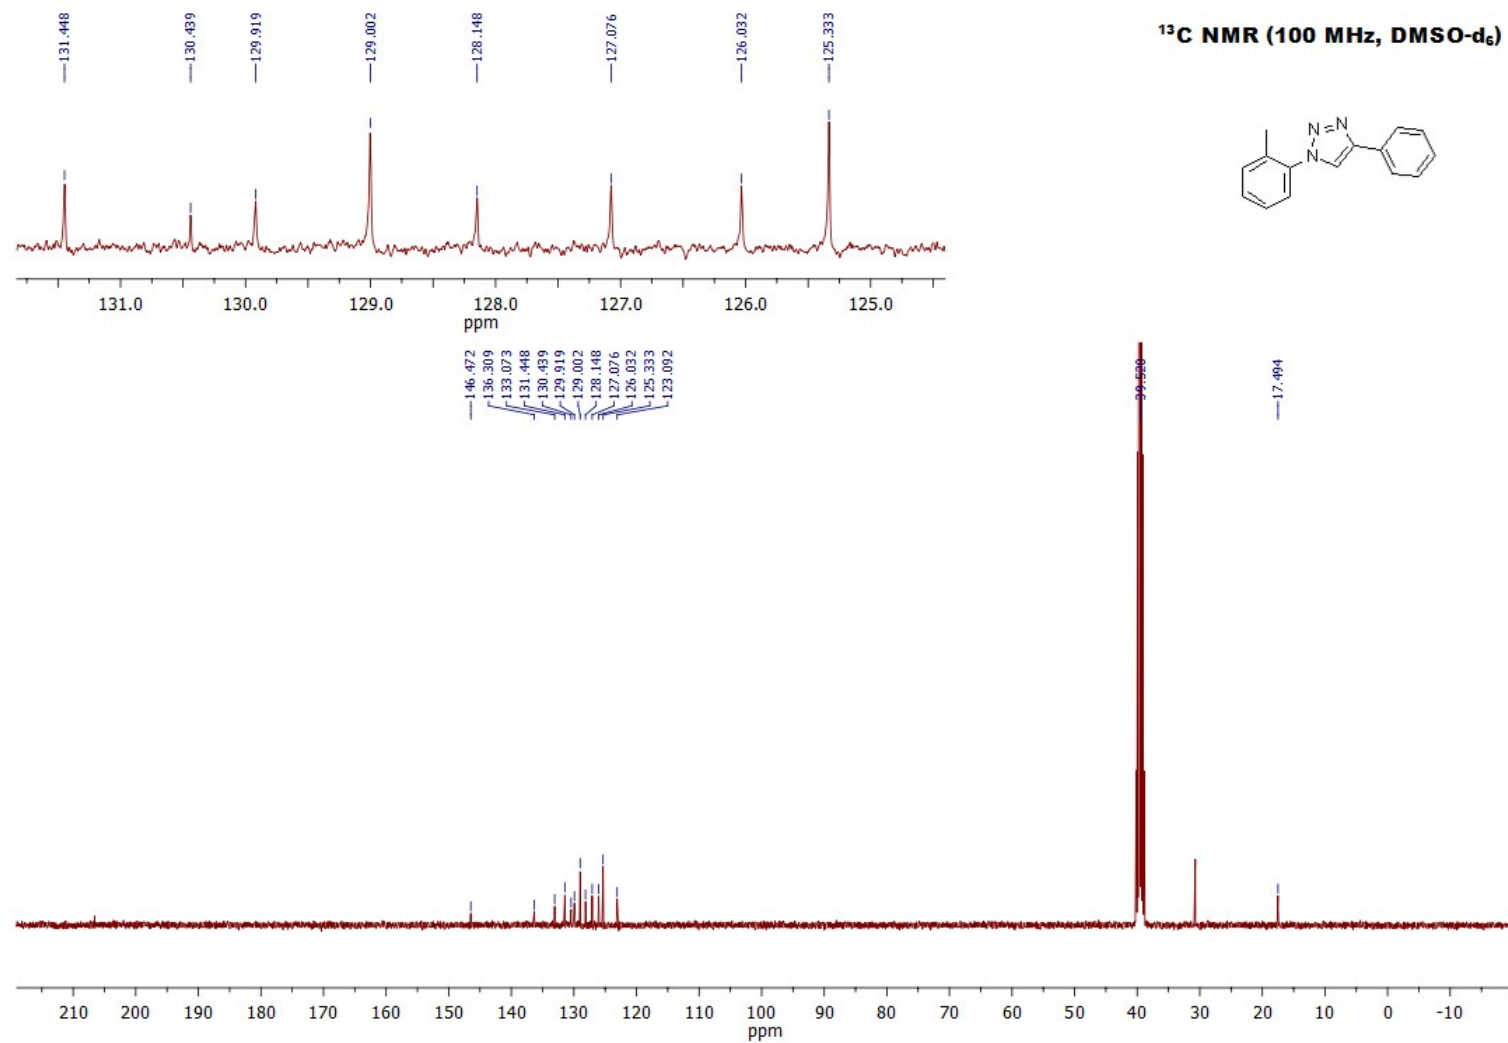

$^1\text{H}$  NMR (400 MHz,  $\text{DMSO-d}_6$ ) spectrum of 1-(4-methoxyphenyl)-4-phenyl-1*H*-1,2,3-triazole (**3fa**).

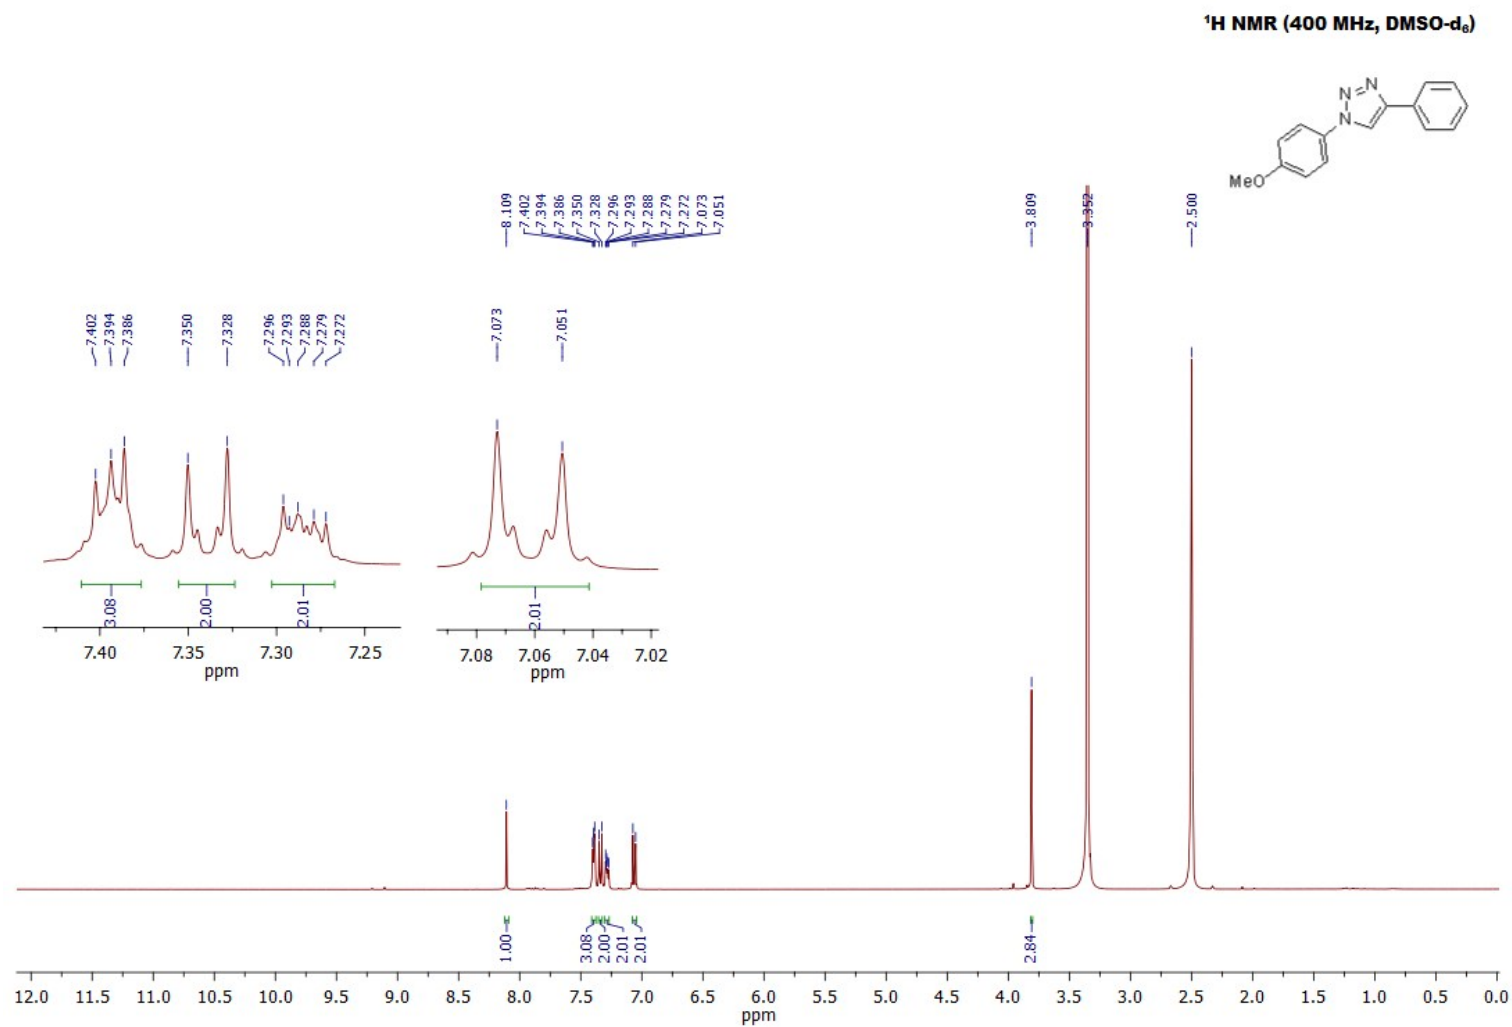

$^{13}\text{C}$  NMR (100 MHz,  $\text{DMSO-d}_6$ ) spectrum of 1-(4-methoxyphenyl)-4-phenyl-1*H*-1,2,3-triazole (**3fa**).

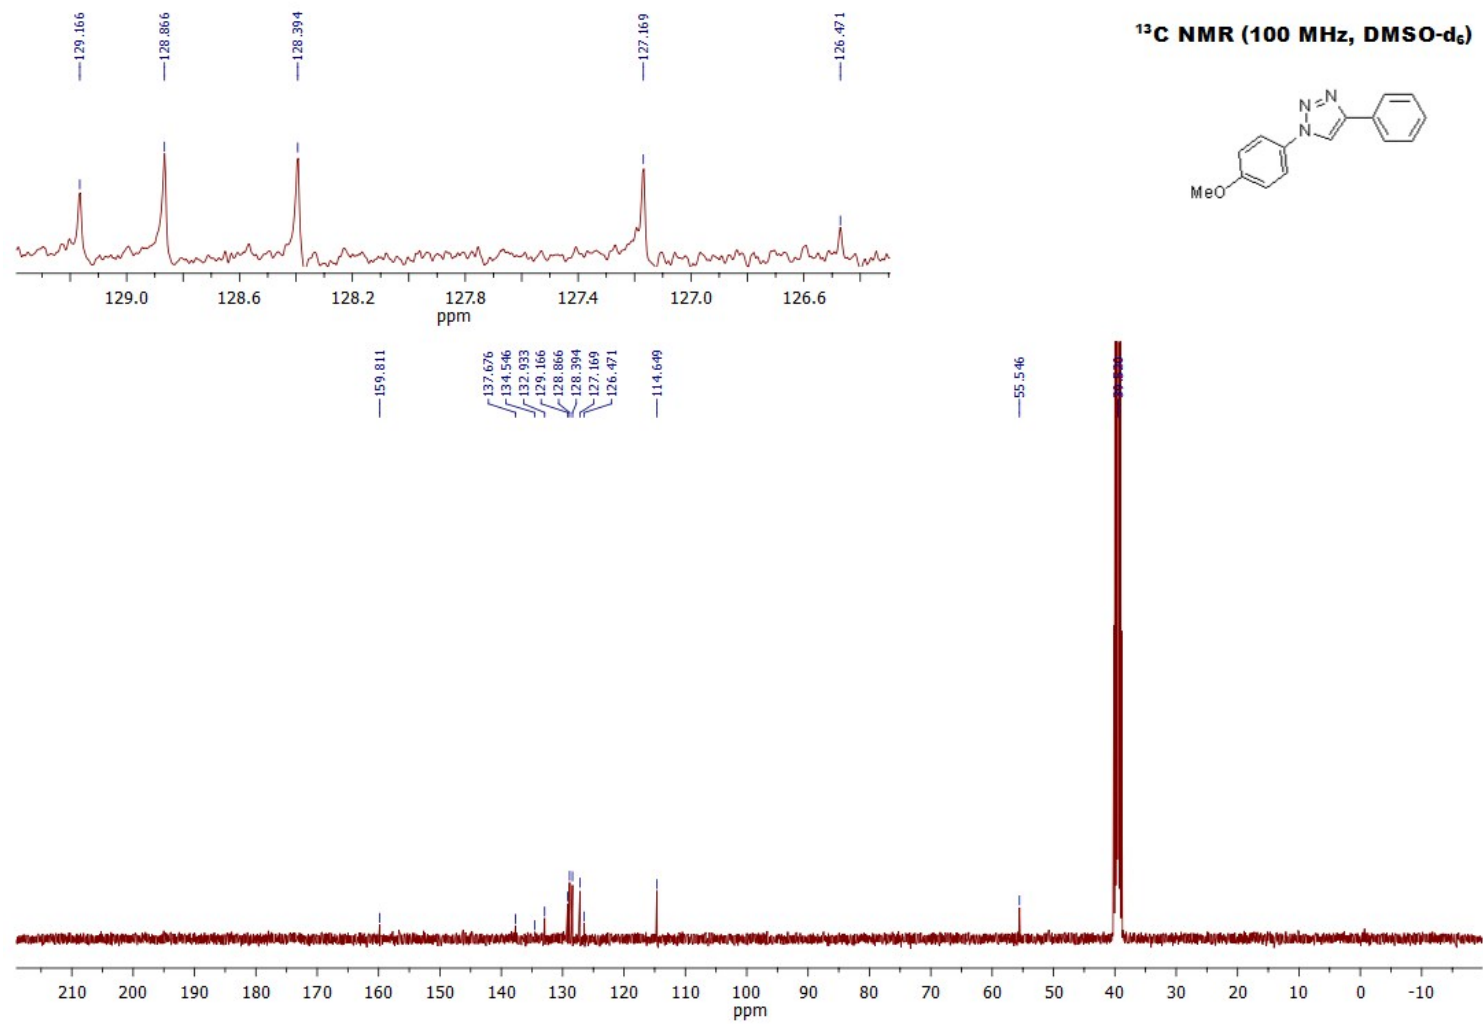

$^1\text{H}$  NMR (400 MHz,  $\text{DMSO-d}_6$ ) spectrum of 1-(2-methoxyphenyl)-4-phenyl-1*H*-1,2,3-triazole (**3ga**).

$^1\text{H}$  NMR (400 MHz,  $\text{DMSO-d}_6$ )

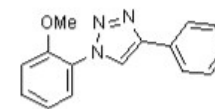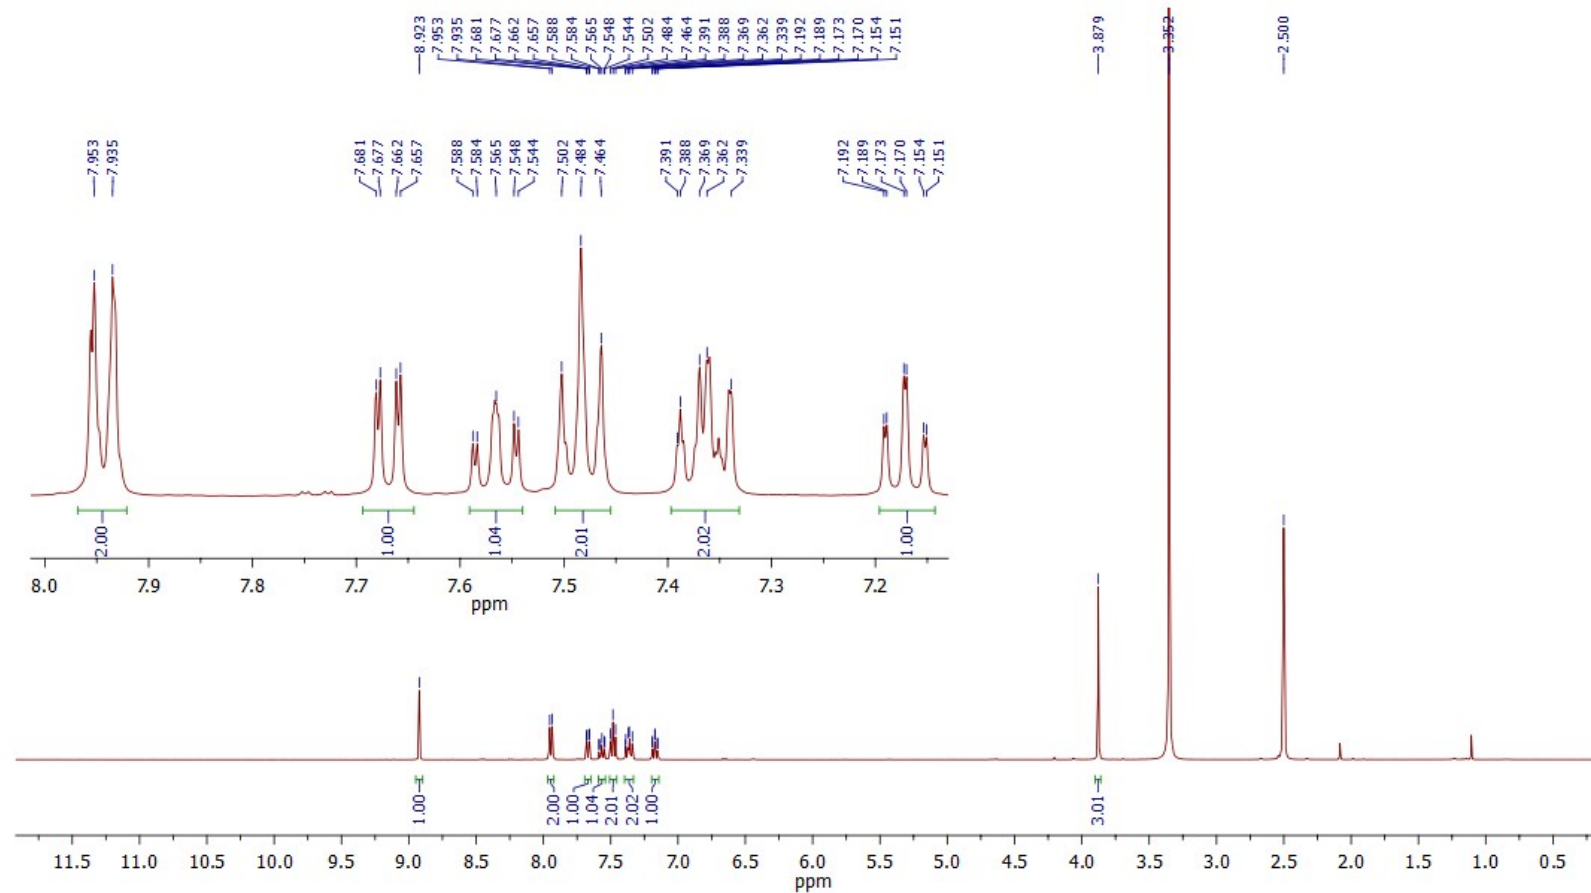



$^{13}\text{C}$  NMR (100 MHz,  $\text{DMSO-d}_6$ ) spectrum of 1-(2-methoxyphenyl)-4-phenyl-1*H*-1,2,3-triazole (**3ga**).

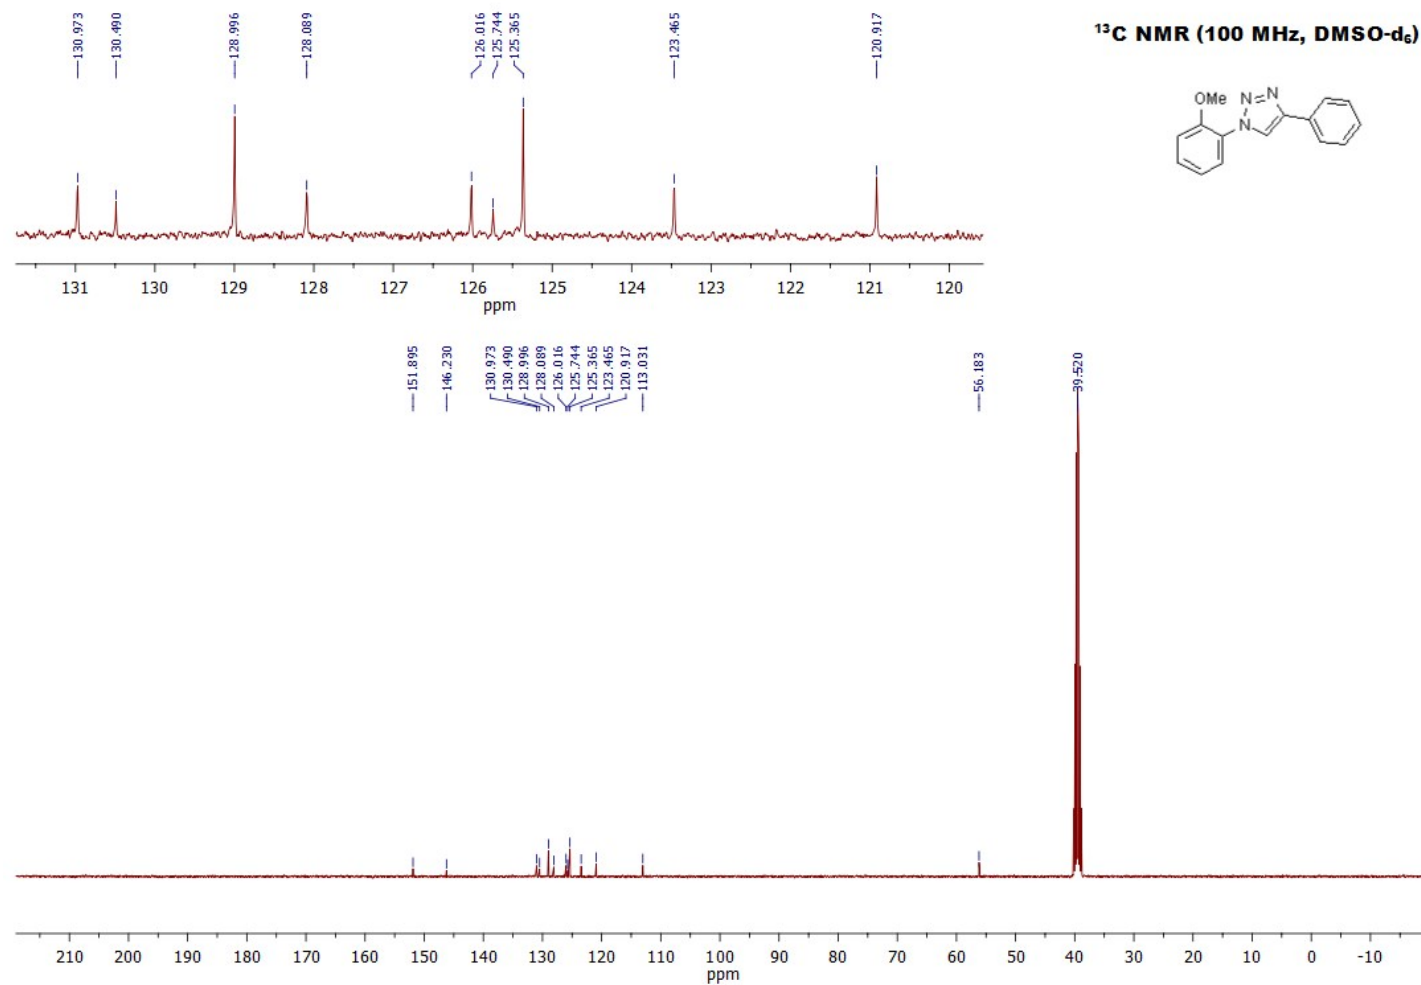

$^1\text{H}$  NMR (400 MHz,  $\text{DMSO-d}_6$ ) spectrum of (3-chloro-5-(4-phenyl-1*H*-1,2,3-triazol-1-yl)phenyl)(phenyl)methanone (**3ha**).

$^1\text{H}$  NMR (400 MHz,  $\text{DMSO-d}_6$ )

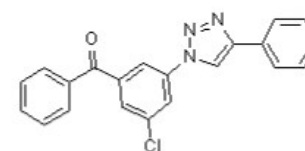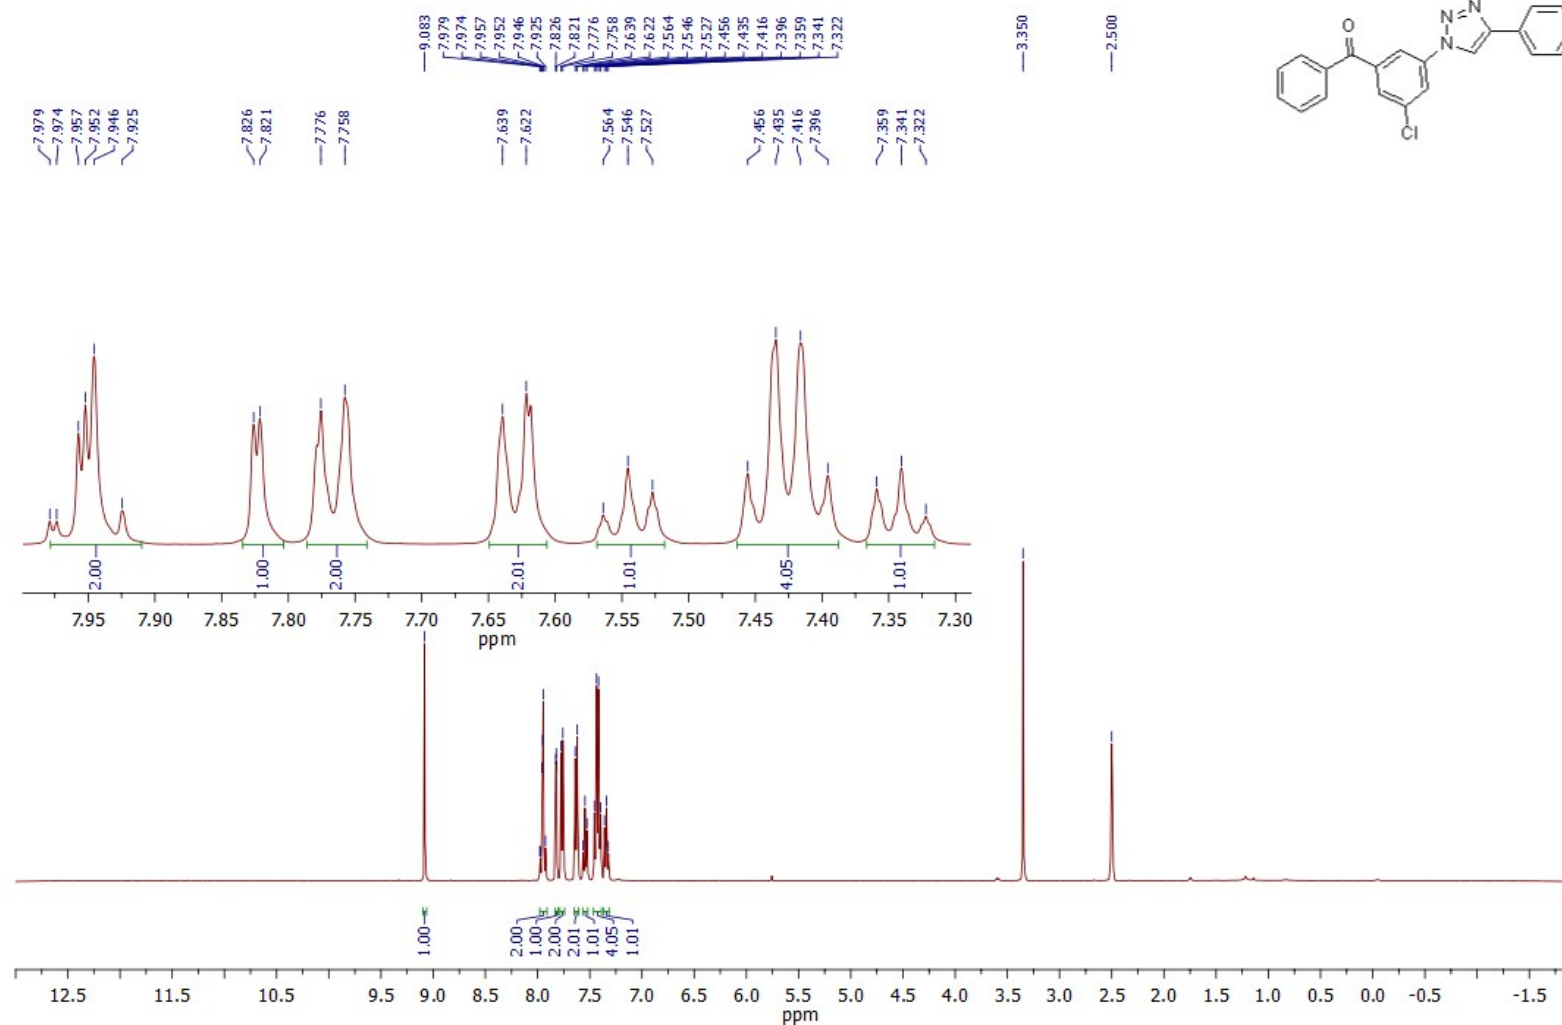

$^{13}\text{C}$  NMR (100 MHz,  $\text{DMSO-d}_6$ ) spectrum of (3-chloro-5-(4-phenyl-1*H*-1,2,3-triazol-1-yl)phenyl)(phenyl)methanone (**3ha**).

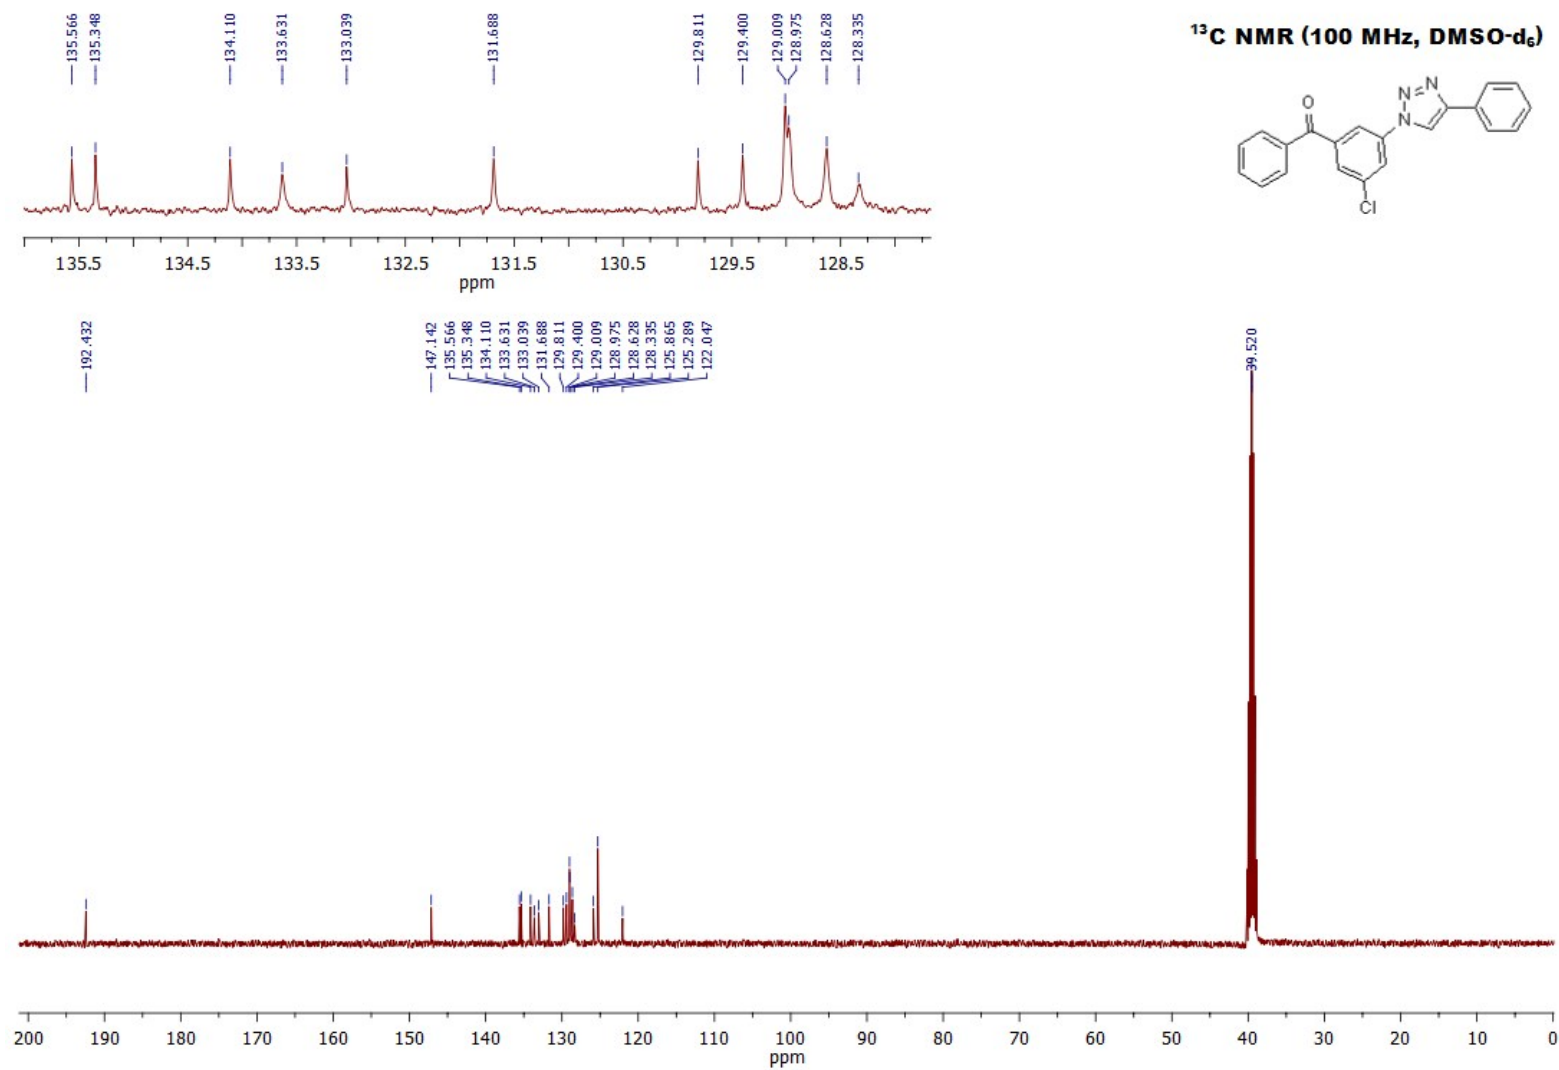

$^1\text{H}$  NMR (400 MHz,  $\text{DMSO-d}_6$ ) spectrum of 4-phenyl-1-(2,4,6-tribromophenyl)-1*H*-1,2,3-triazole (**3ia**).

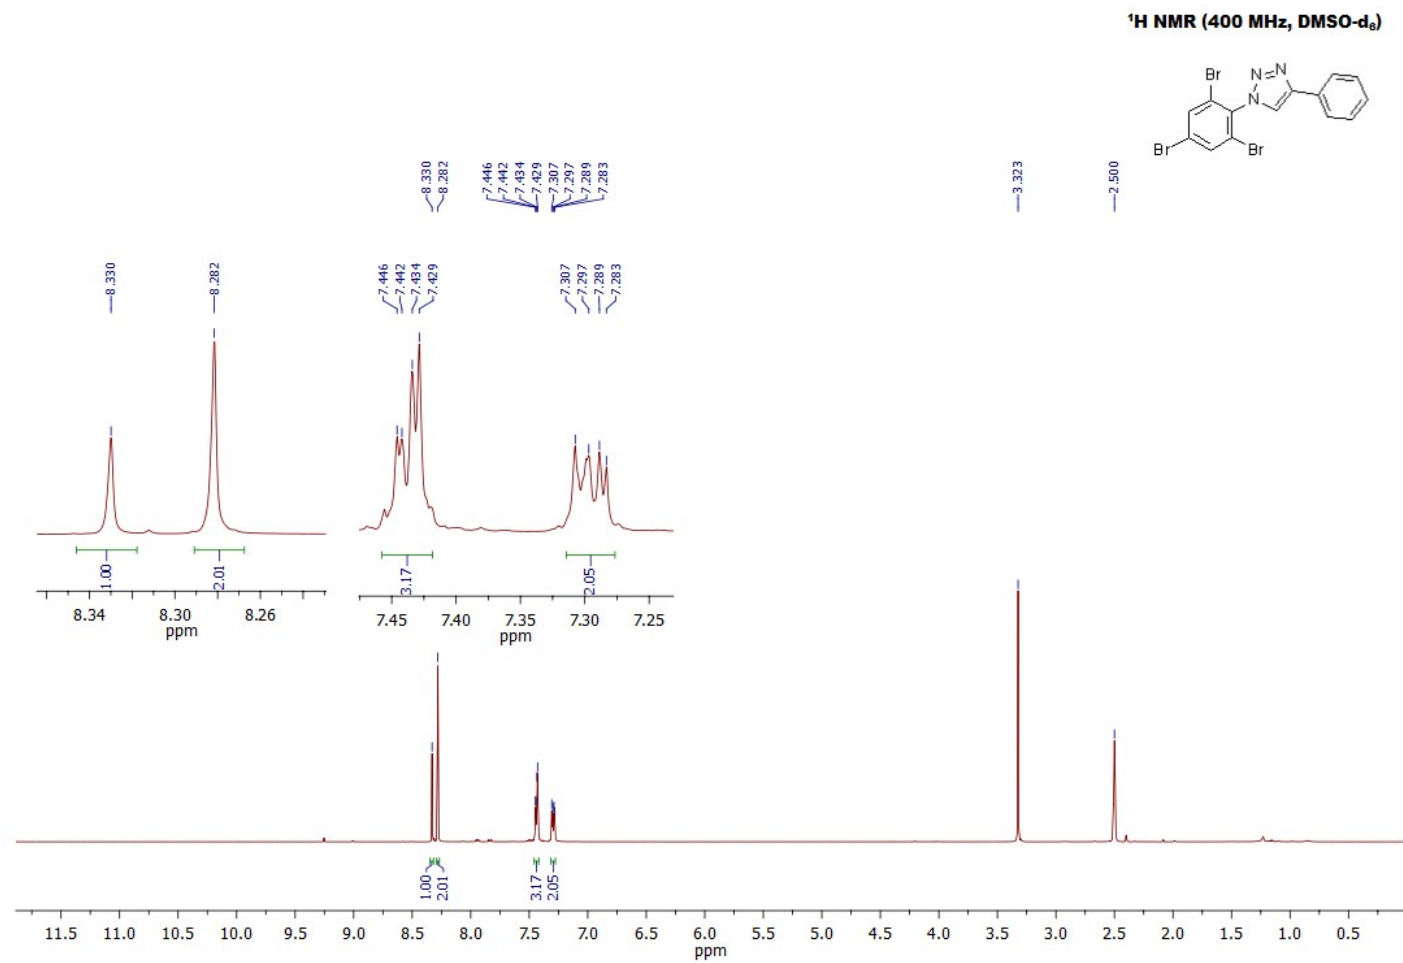

$^{13}\text{C}$  NMR (100 MHz,  $\text{DMSO-d}_6$ ) spectrum of 4-phenyl-1-(2,4,6-tribromophenyl)-1*H*-1,2,3-triazole (**3ia**).

$^{13}\text{C}$  NMR (100 MHz,  $\text{DMSO-d}_6$ )

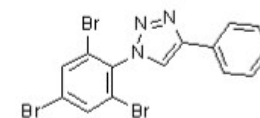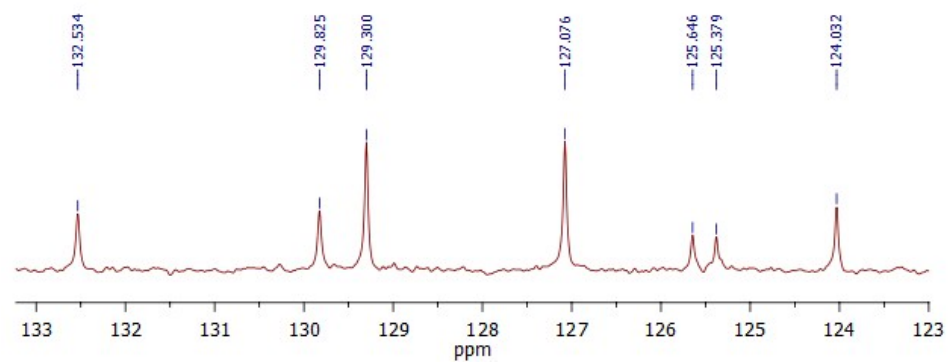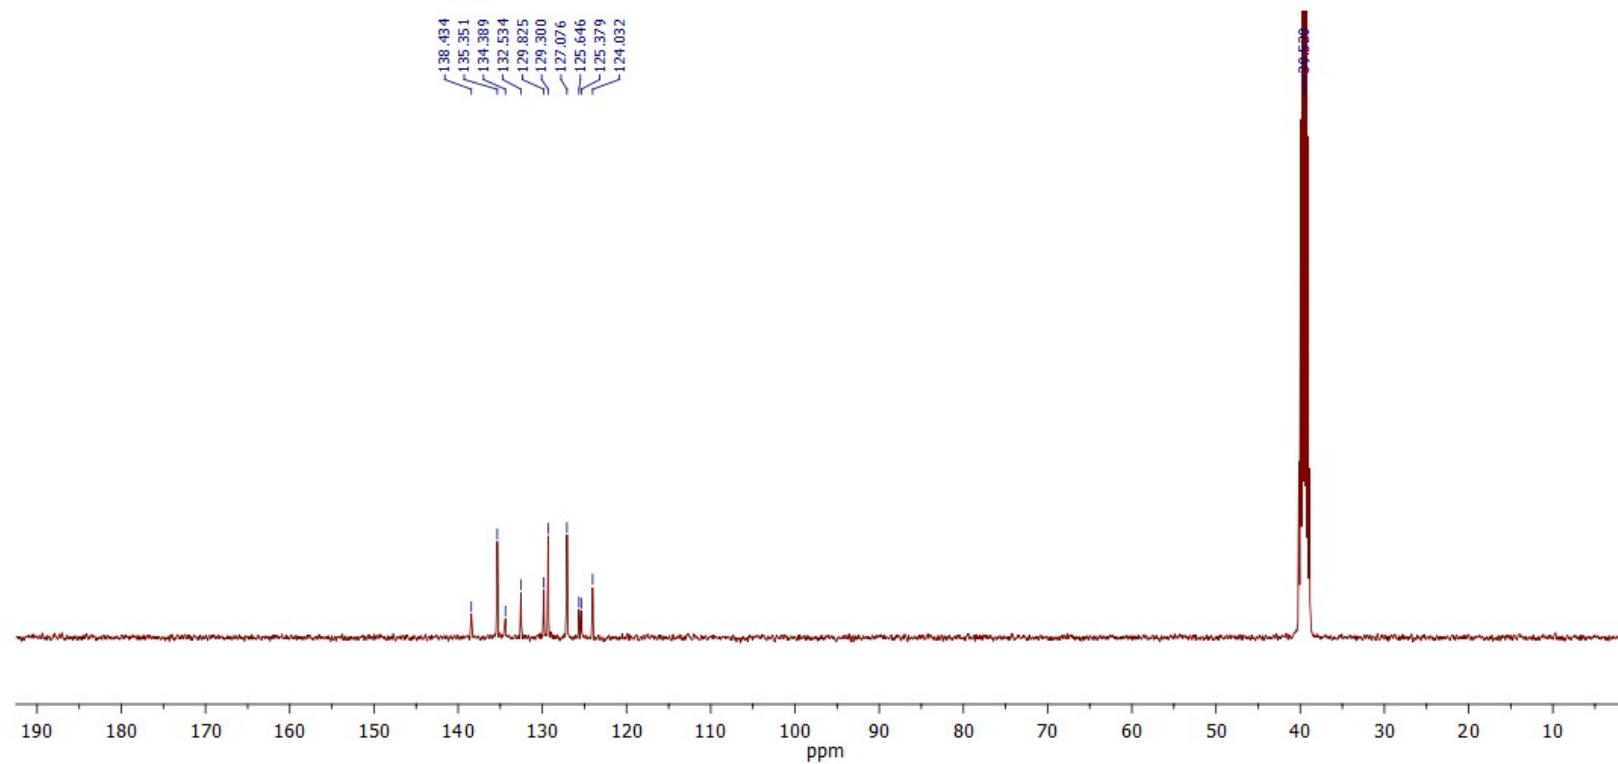

$^1\text{H}$  NMR (400 MHz,  $\text{DMSO-d}_6$ ) spectrum of 1-([1,1'-biphenyl]-4-yl)-4-phenyl-1*H*-1,2,3-triazole (**3ja**).

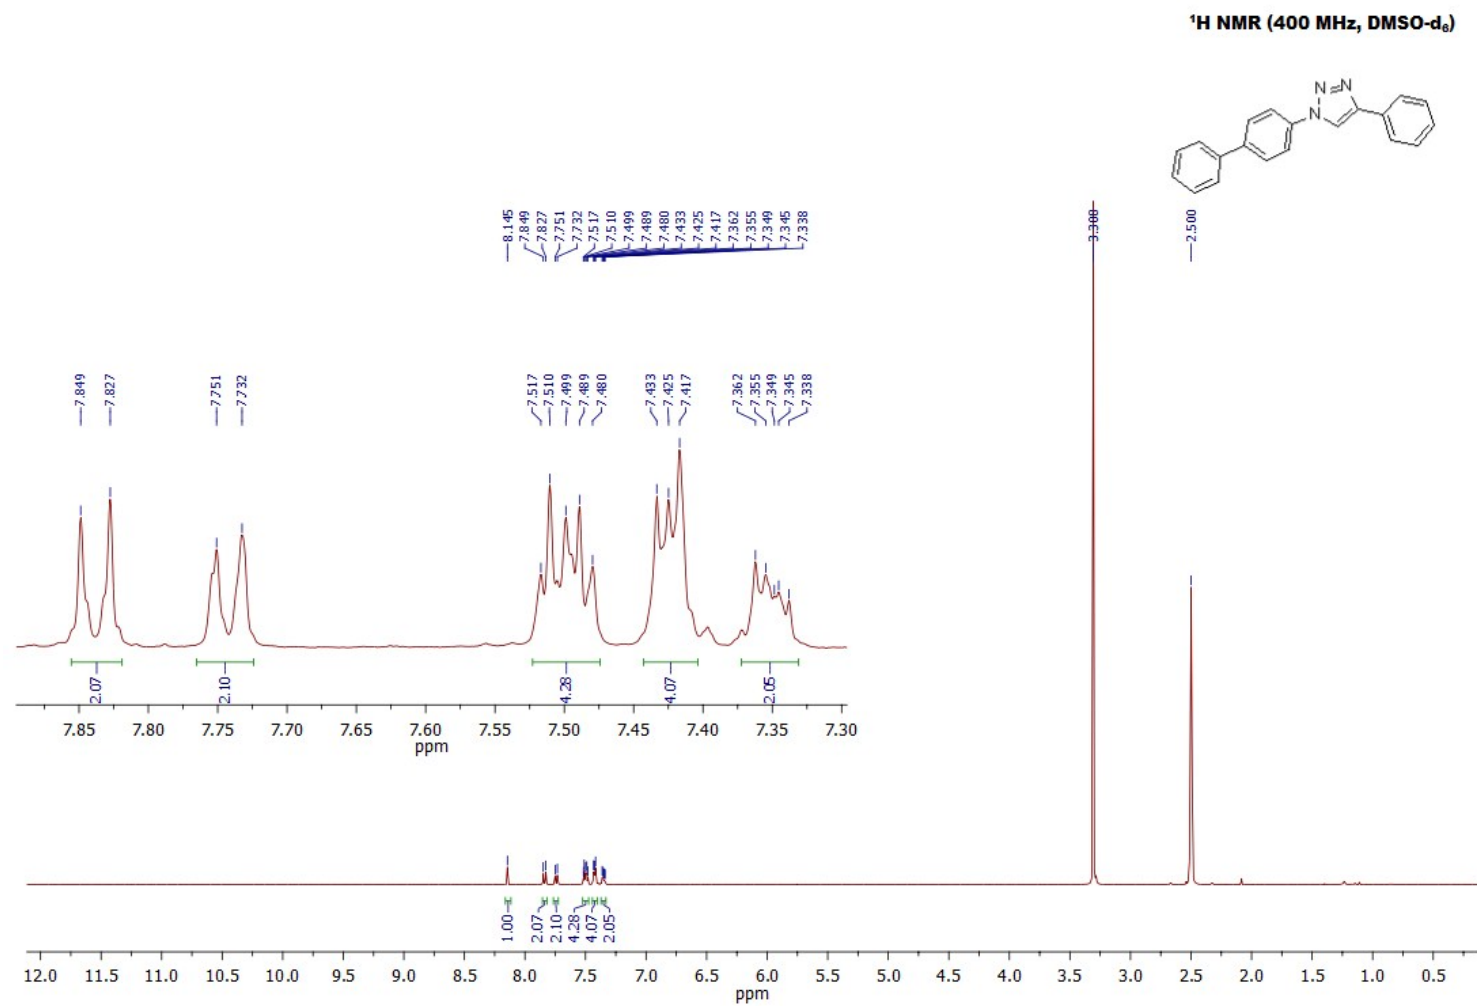

$^{13}\text{C}$  NMR (100 MHz,  $\text{DMSO-d}_6$ ) spectrum of 1-([1,1'-biphenyl]-4-yl)-4-phenyl-1*H*-1,2,3-triazole (**3ja**).

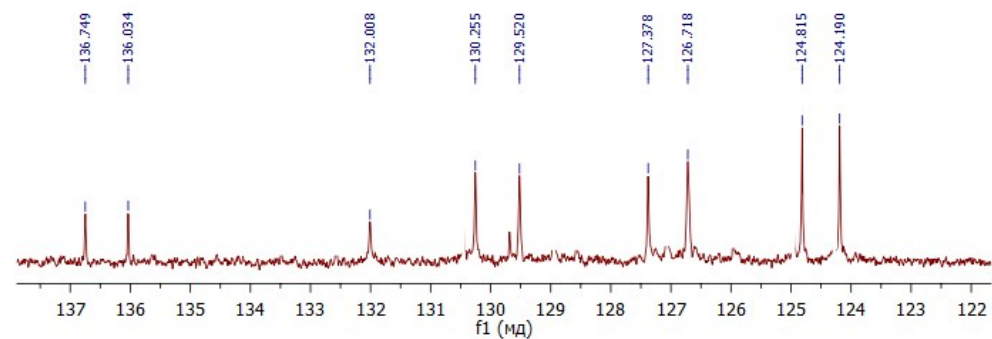

$^{13}\text{C}$  NMR (100 MHz,  $\text{DMSO-d}_6$ )

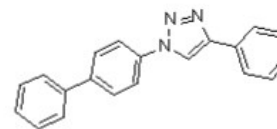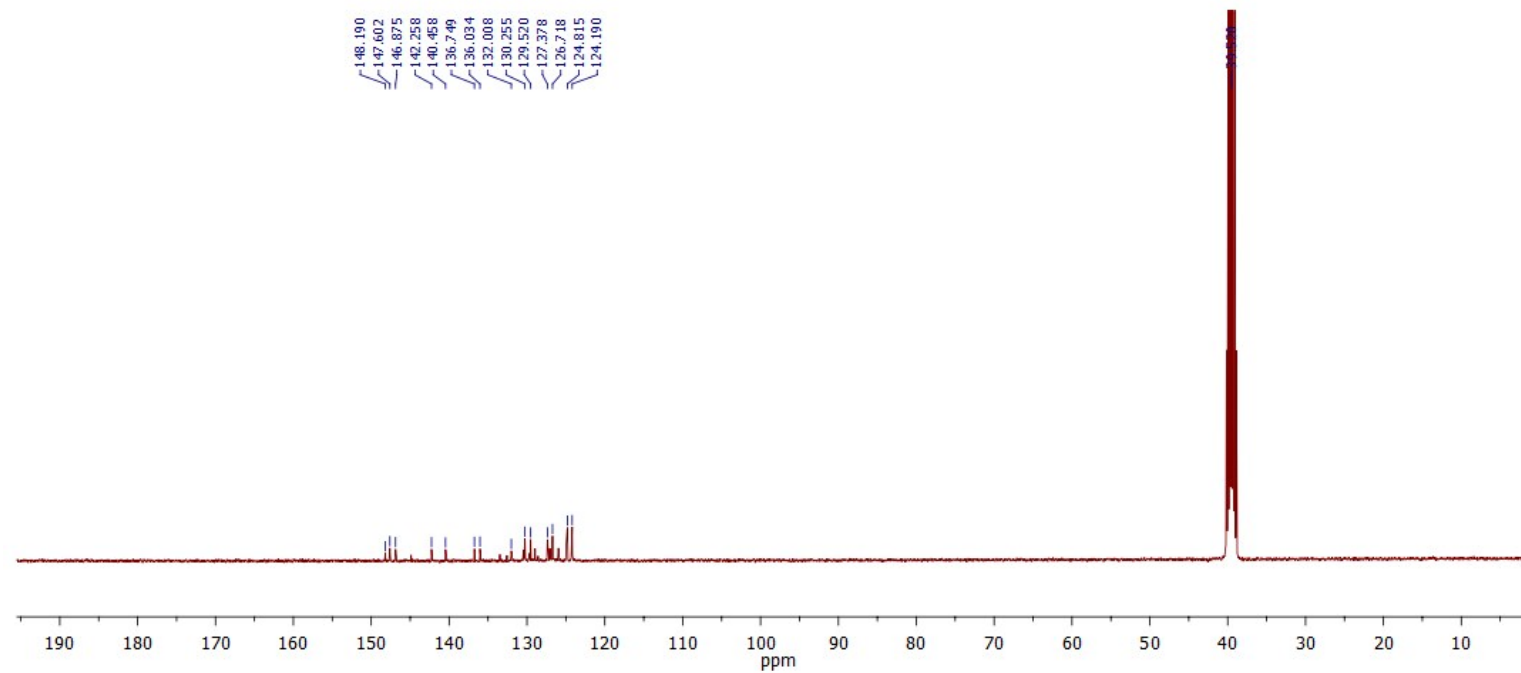

$^1\text{H}$  NMR (300 MHz,  $\text{DMSO-d}_6$ ) spectrum of 1-(anthracen-2-yl)-4-phenyl-1*H*-1,2,3-triazole (**3ka**).

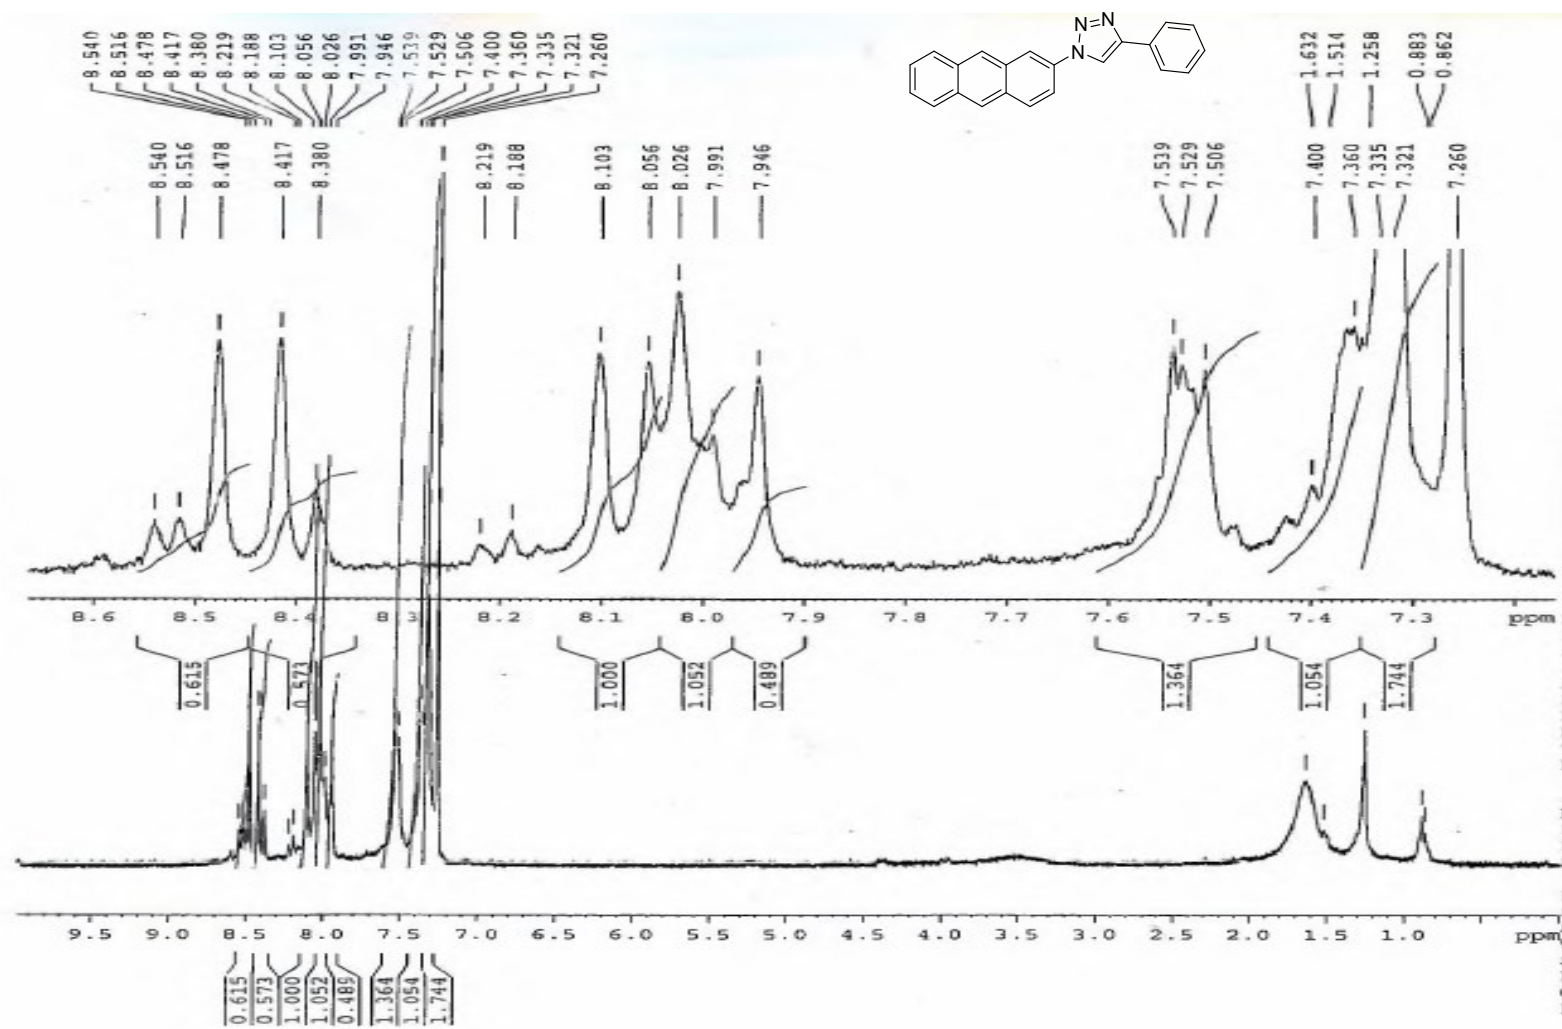



$^1\text{H}$  NMR (400 MHz,  $\text{DMSO-d}_6$ ) spectrum of 1-benzyl-4-phenyl-1*H*-1,2,3-triazole (**3la**).

$^1\text{H}$  NMR (400 MHz,  $\text{DMSO-d}_6$ )

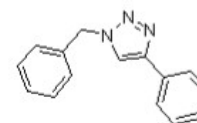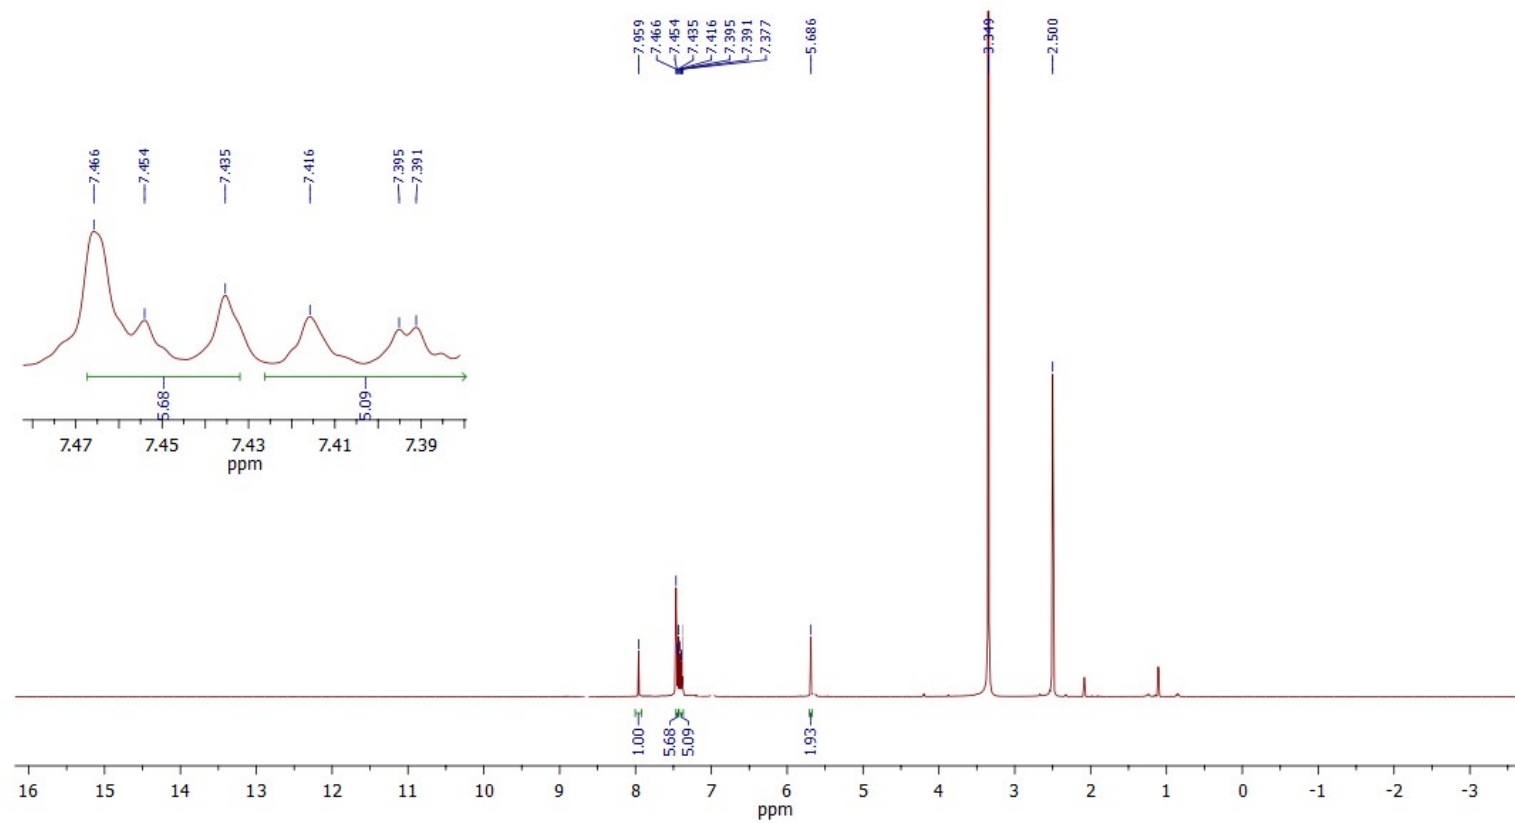

$^{13}\text{C}$  NMR (100 MHz,  $\text{DMSO-d}_6$ ) spectrum of 1-benzyl-4-phenyl-*1H*-1,2,3-triazole (**3la**).

$^{13}\text{C}$  NMR (100 MHz,  $\text{DMSO-d}_6$ )

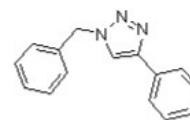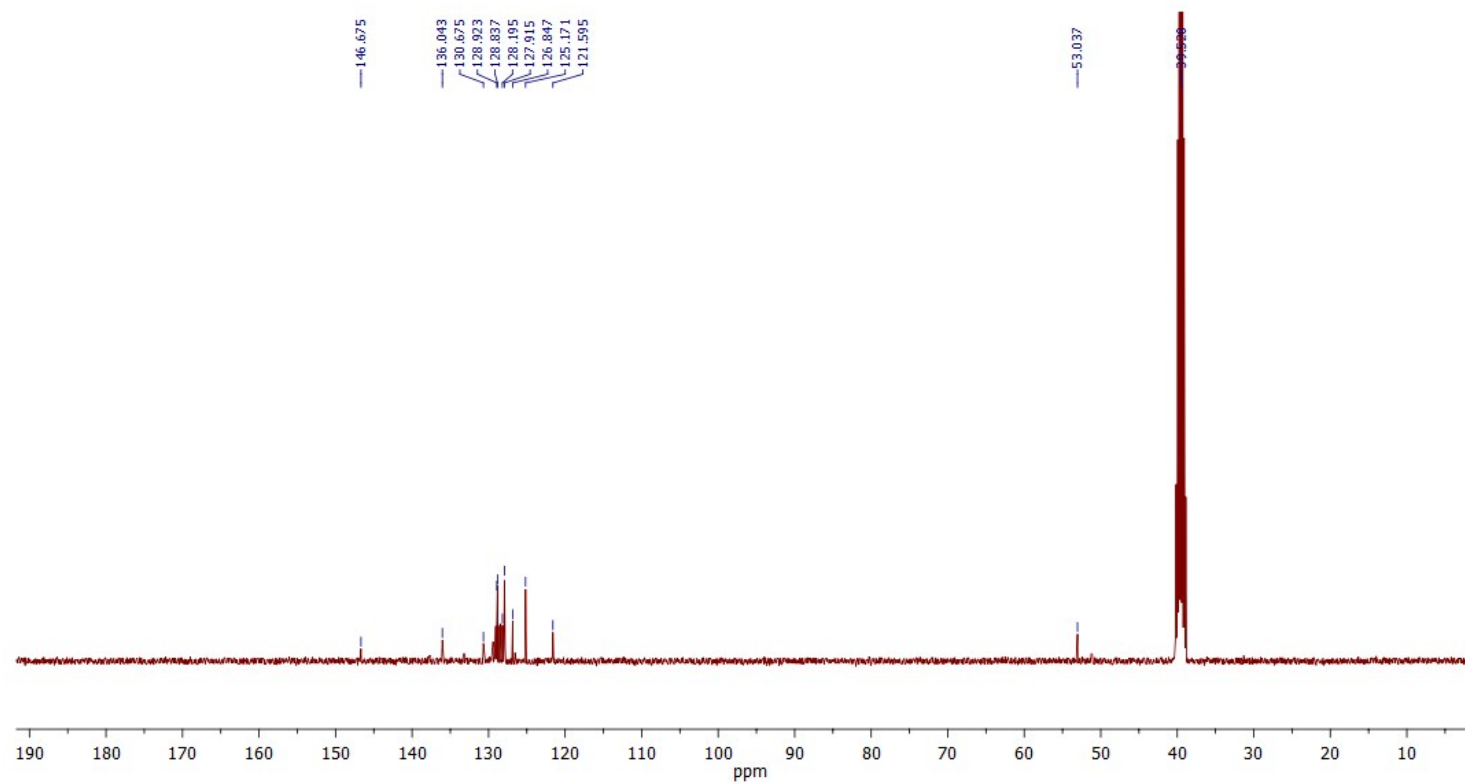

$^1\text{H}$  NMR (400 MHz,  $\text{DMSO-d}_6$ ) spectrum of 1,4-bis(4-nitrophenyl)-1*H*-1,2,3-triazole (**3ab**).

$^1\text{H}$  NMR (400 MHz,  $\text{DMSO-d}_6$ )

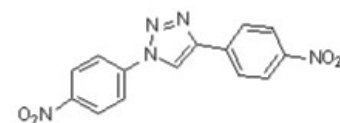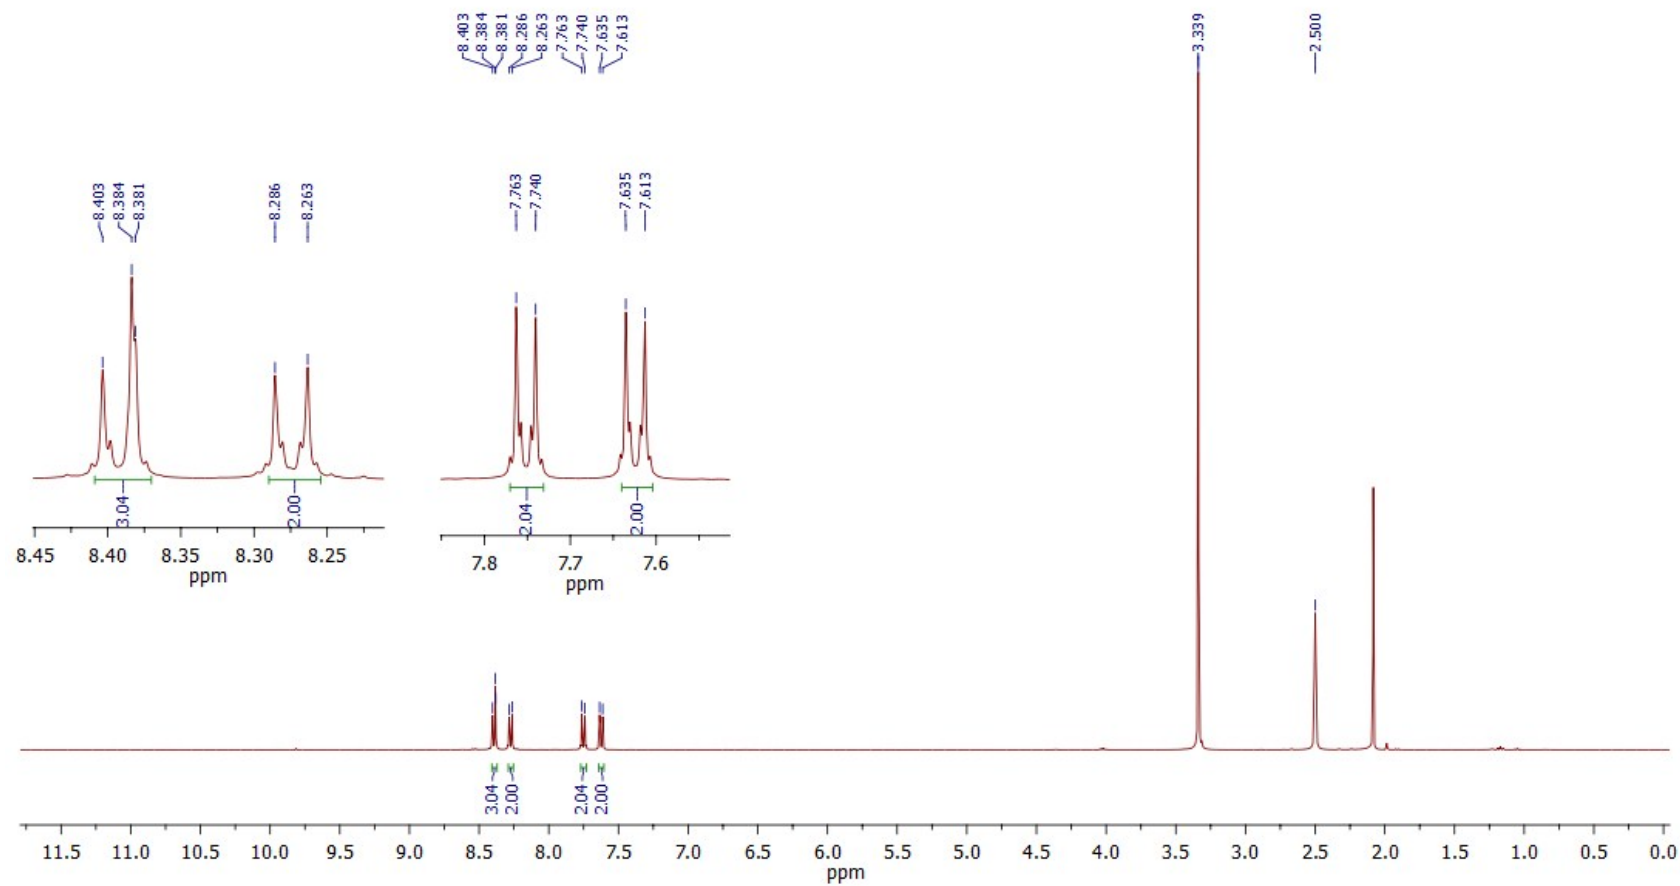

$^{13}\text{C}$  NMR (100 MHz,  $\text{DMSO-d}_6$ ) spectrum of 1,4-bis(4-nitrophenyl)-1*H*-1,2,3-triazole (**3ab**).

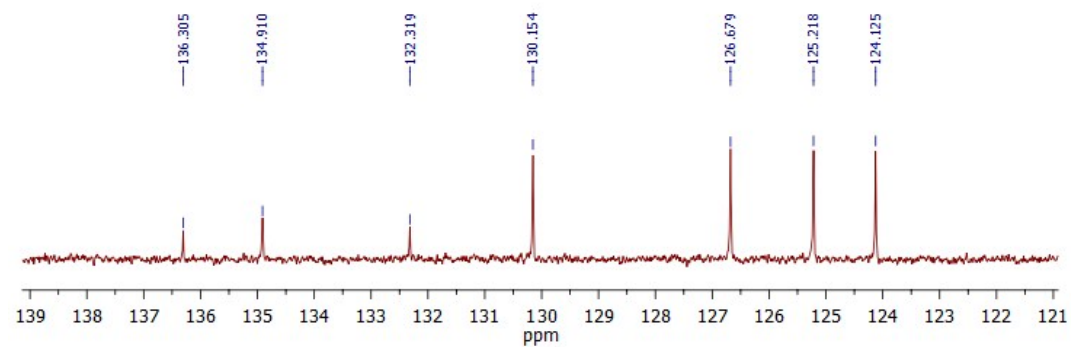

$^{13}\text{C}$  NMR (100 MHz,  $\text{DMSO-d}_6$ )

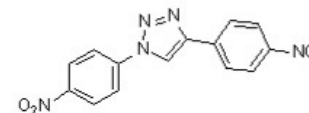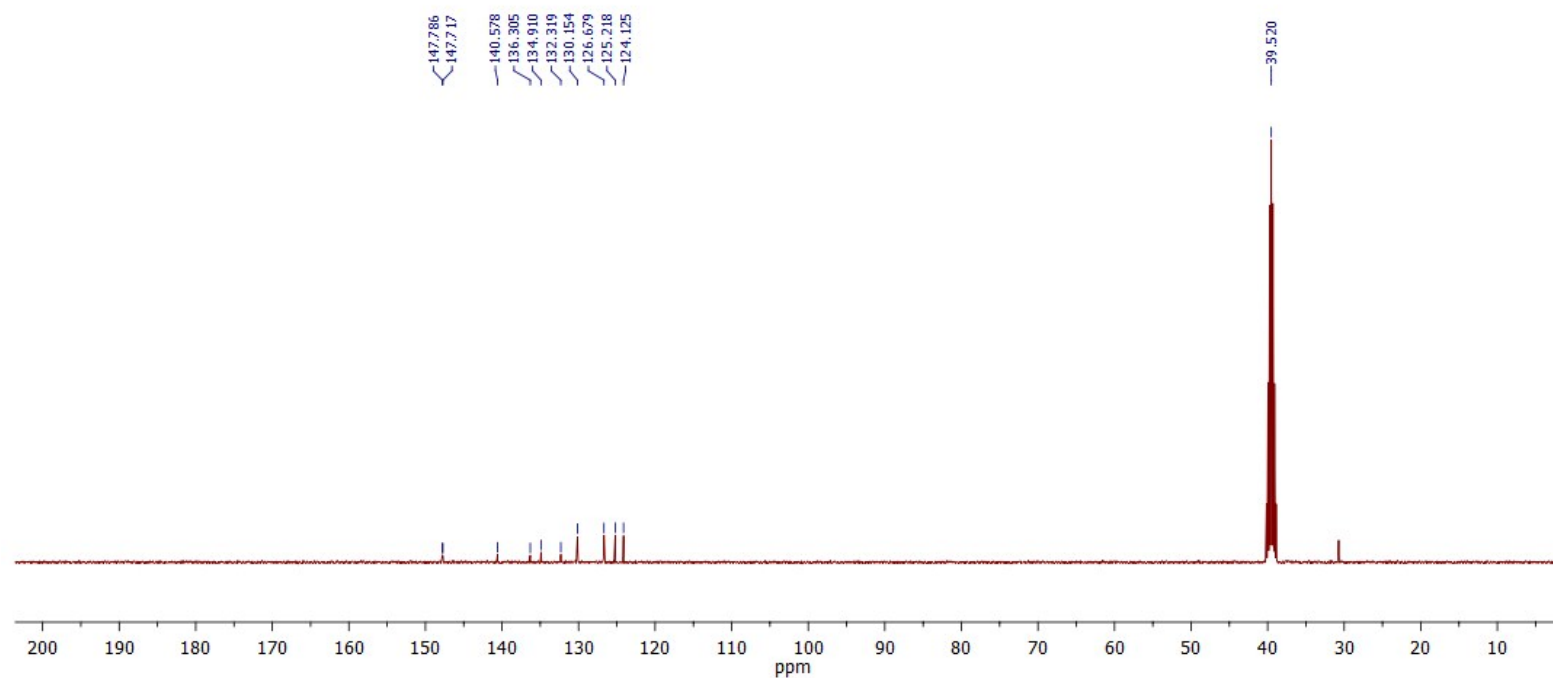

$^1\text{H}$  NMR (400 MHz,  $\text{DMSO-d}_6$ ) spectrum of 1-(4-nitrophenyl)-4-butyl-1*H*-1,2,3-triazole (**3ac**).

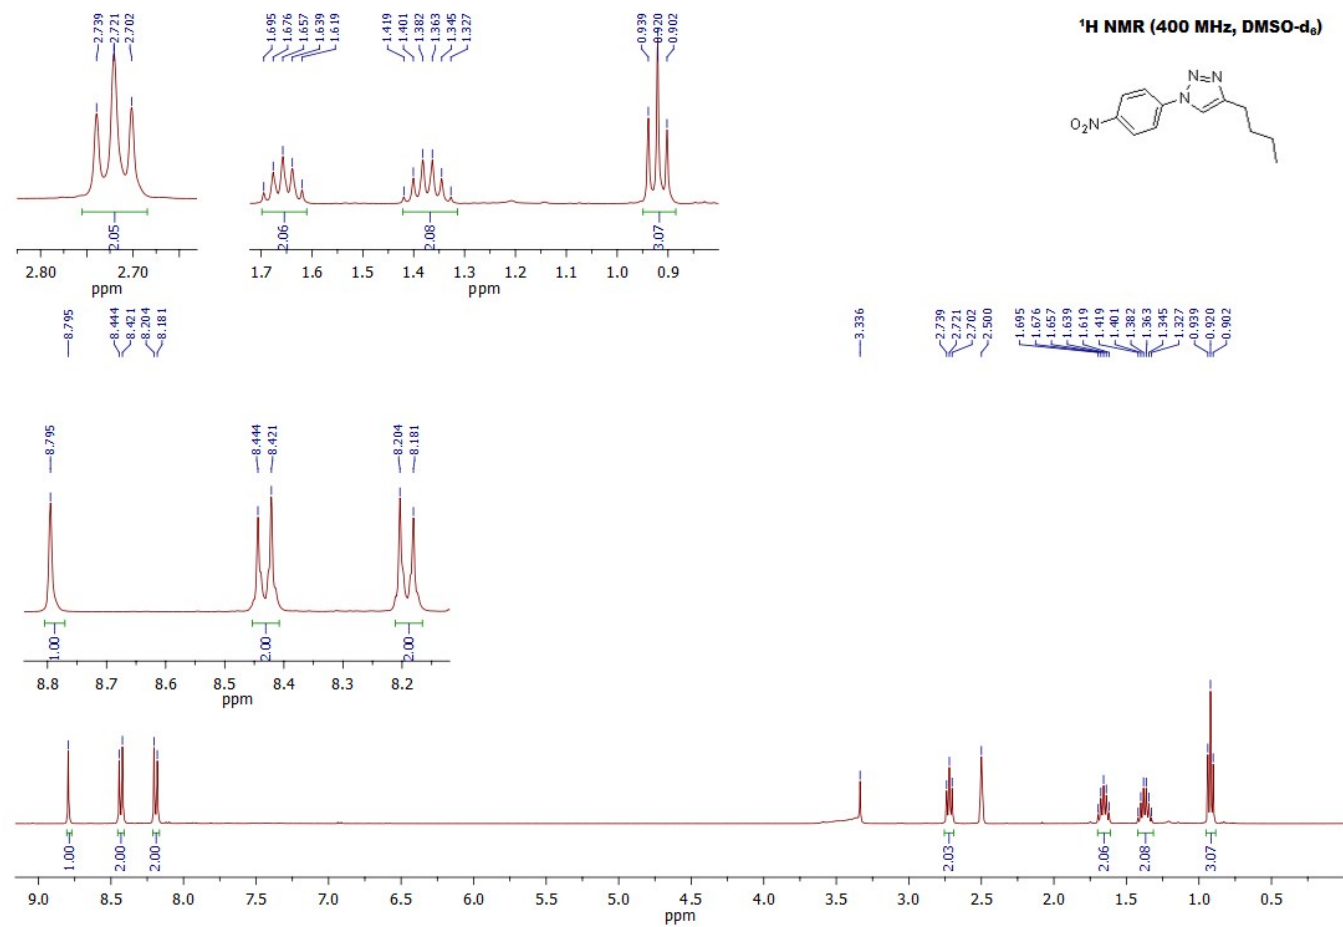

$^{13}\text{C}$  NMR (100 MHz, DMSO- $\text{d}_6$ ) spectrum of 1-(4-nitrophenyl)-4-butyl-1*H*-1,2,3-triazole (**3ac**).

$^{13}\text{C}$  NMR (100 MHz, DMSO- $\text{d}_6$ )

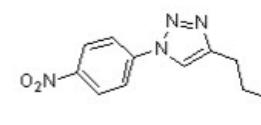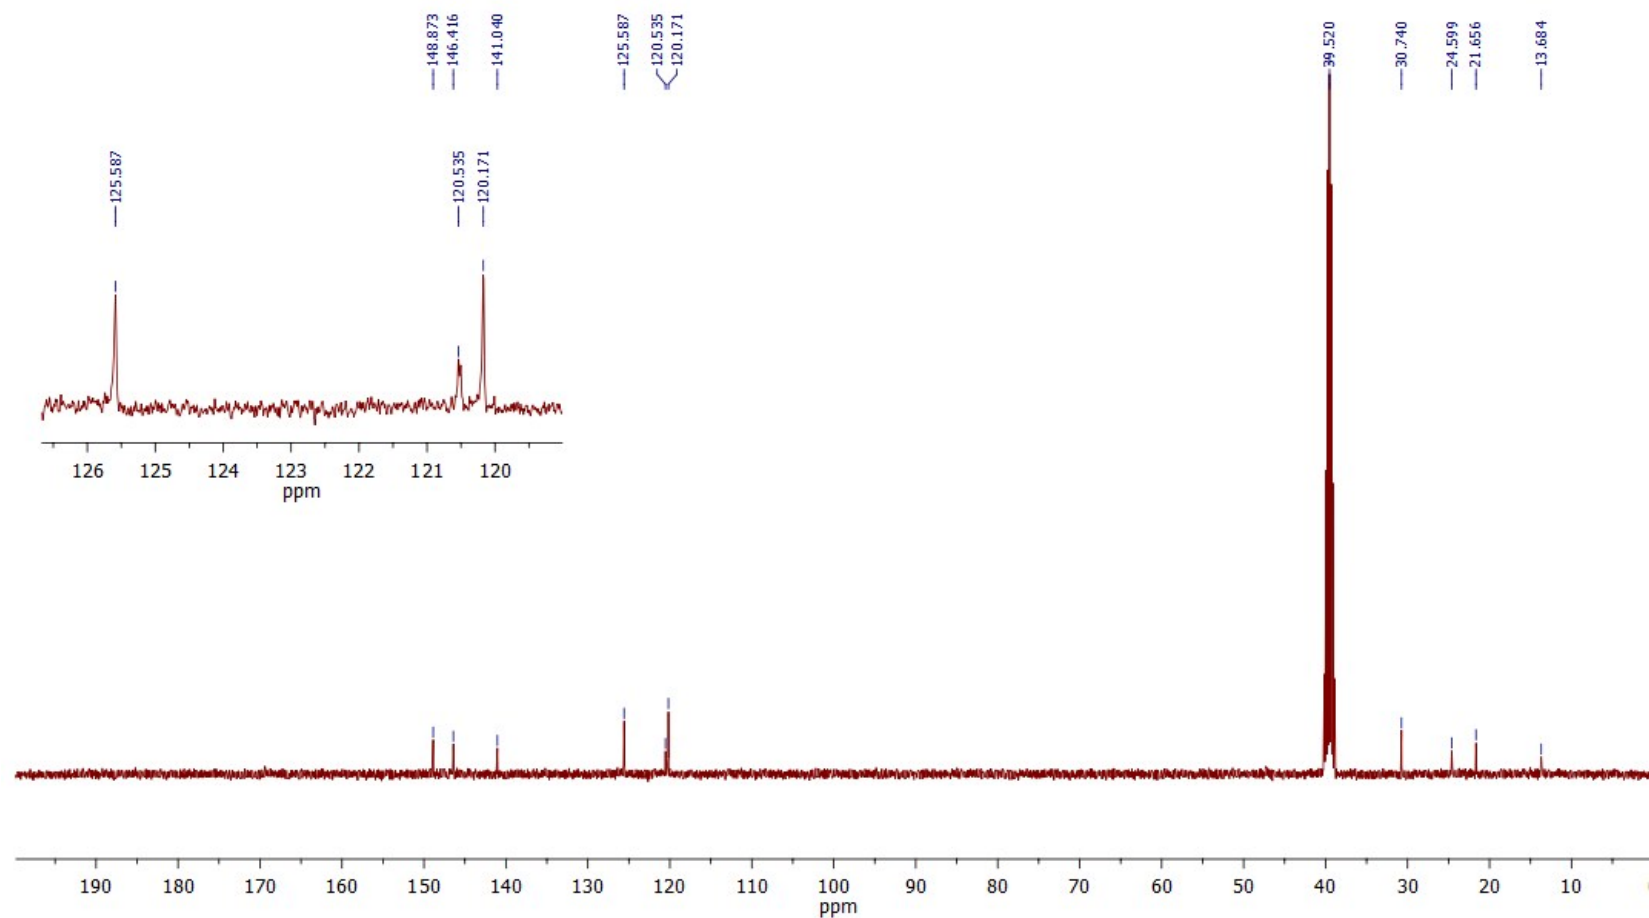

$^1\text{H}$  NMR (300 MHz,  $\text{DMSO-d}_6$ ) spectrum of 4-butyl-1-(p-tolyl)-1H-1,2,3-triazole (**3dc**).

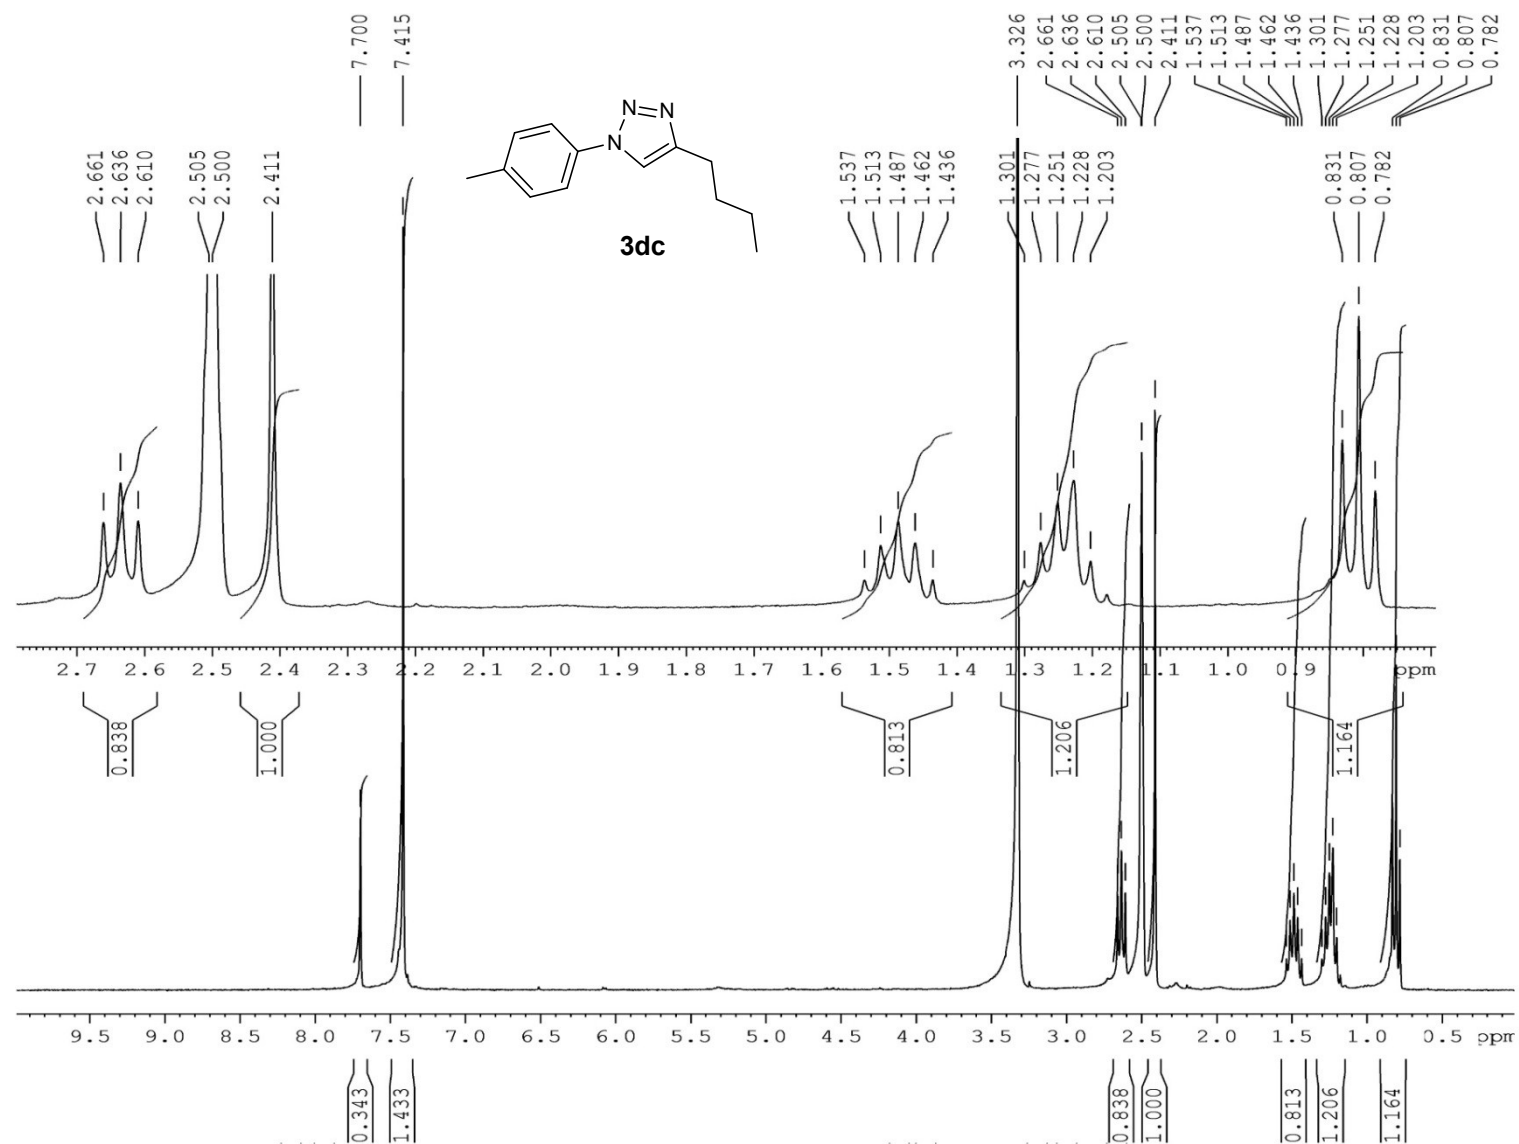

$^1\text{H}$  NMR (400 MHz,  $\text{DMSO-d}_6$ ) spectrum of (1-(4-nitrophenyl)-1*H*-1,2,3-triazol-4-yl)methanol (**3ad**).

$^1\text{H}$  NMR (400 MHz,  $\text{DMSO-d}_6$ )

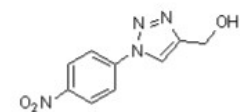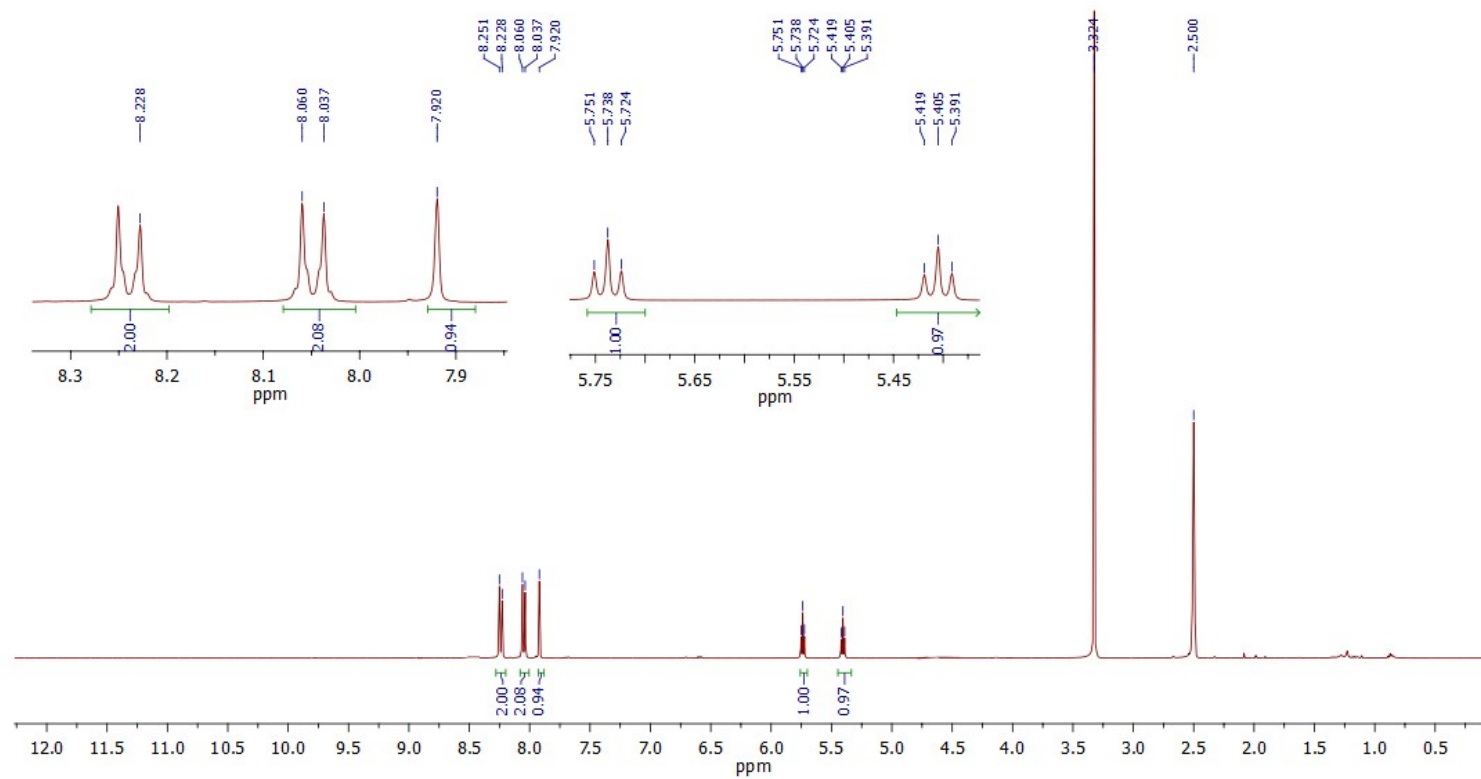



$^1\text{H}$  NMR (400 MHz,  $\text{DMSO-d}_6$ ) spectrum of (1-(4-methoxyphenyl)-1*H*-1,2,3-triazol-4-yl)methanol (**3fd**).

$^1\text{H}$  NMR (400 MHz,  $\text{DMSO-d}_6$ )

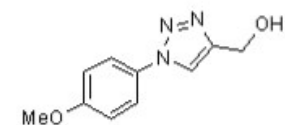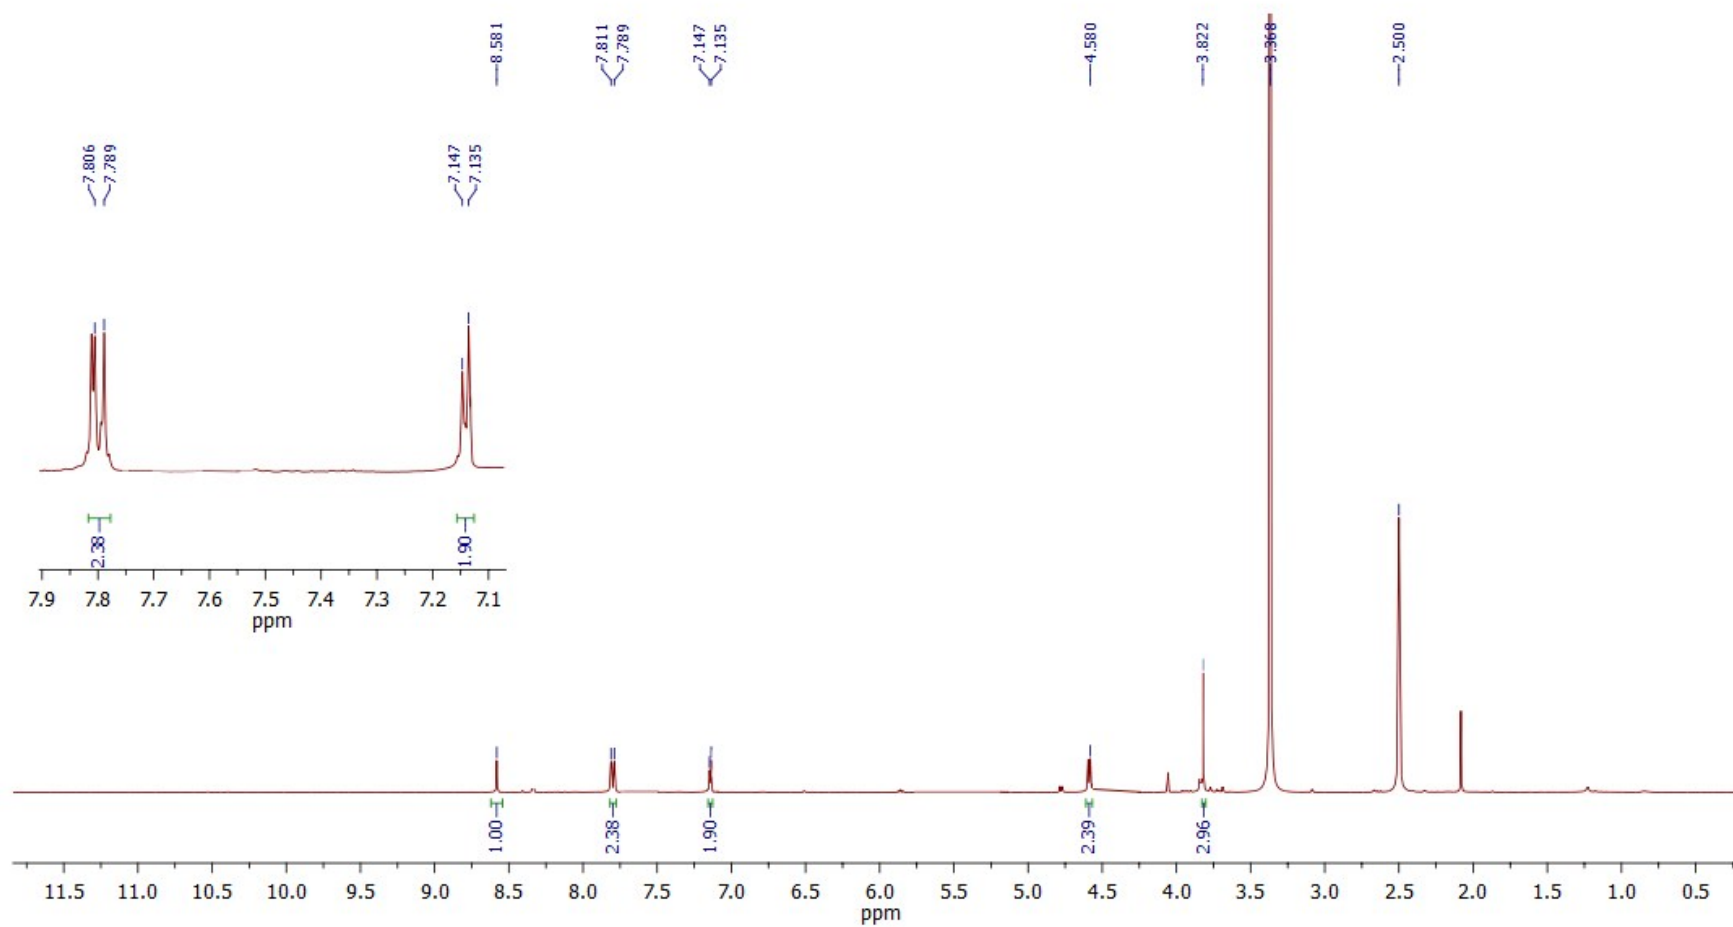

$^1\text{H}$  NMR (400 MHz,  $\text{DMSO-d}_6$ ) spectrum of 1-(4-nitrophenyl)-4,5-diphenyl-1*H*-1,2,3-triazole (**3ae**).

$^1\text{H}$  NMR (400 MHz,  $\text{DMSO-d}_6$ )

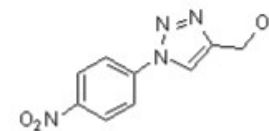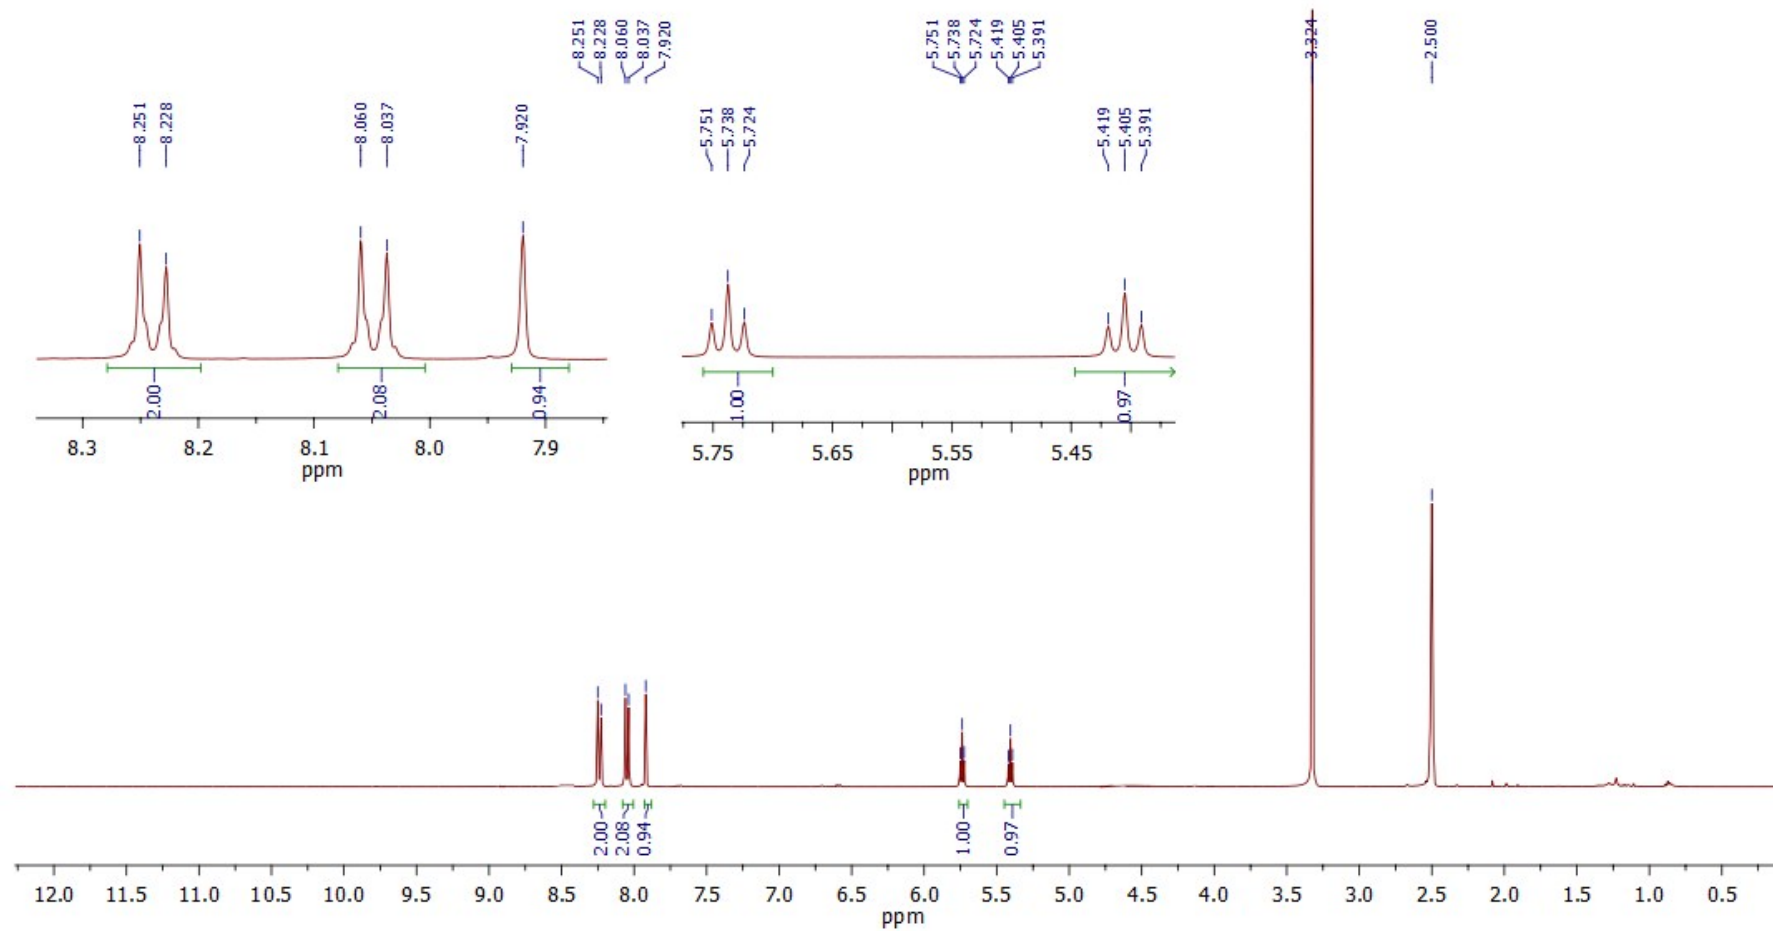

$^1\text{H}$  NMR (400 MHz,  $\text{DMSO-d}_6$ ) spectrum of 1-(2-methoxyphenyl)-4,5-diphenyl-1*H*-1,2,3-triazole (**3ge**).

$^1\text{H}$  NMR (400 MHz,  $\text{DMSO-d}_6$ )

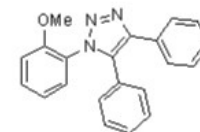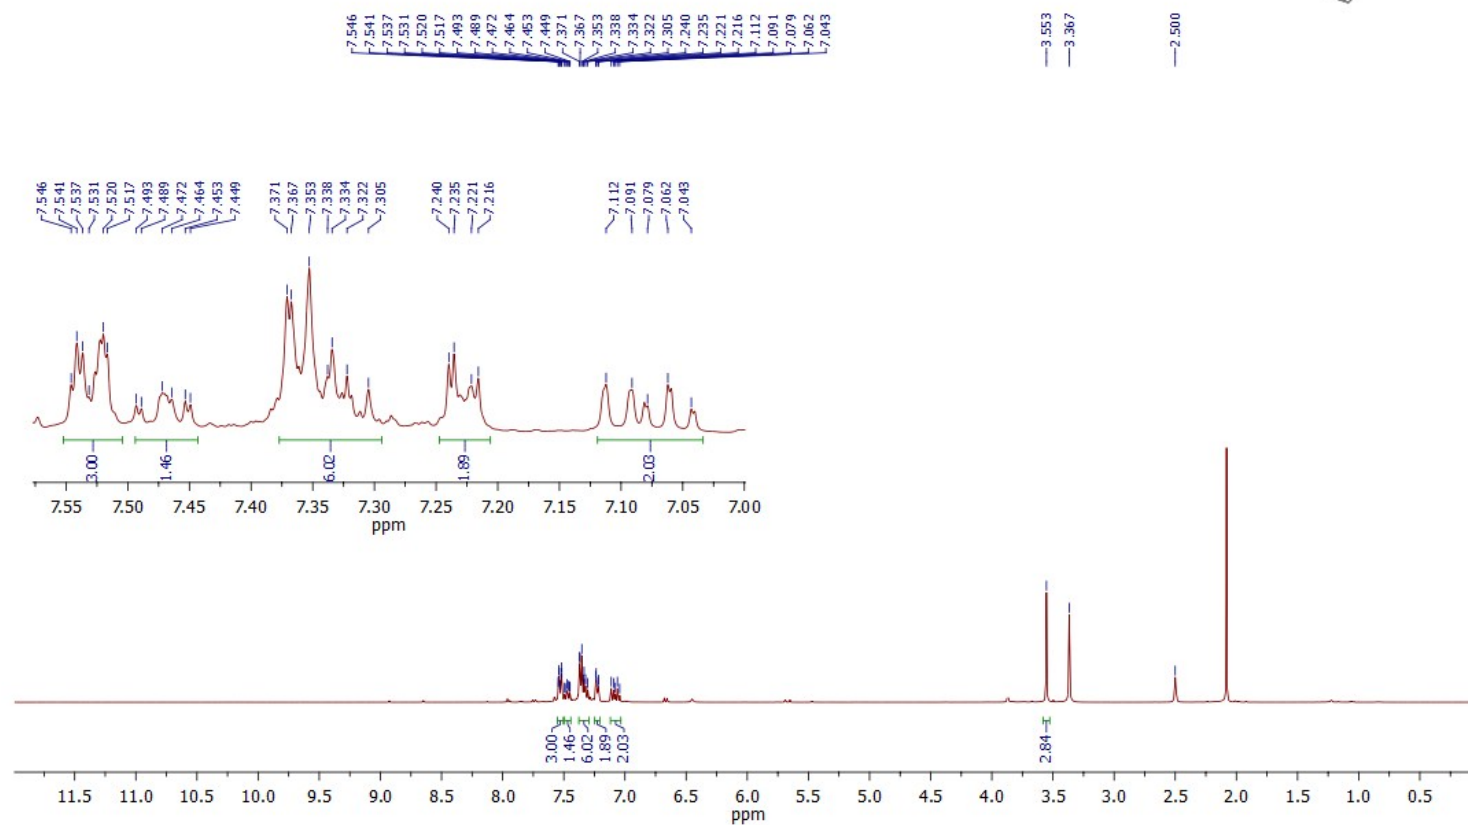

$^{13}\text{C}$  NMR (100 MHz,  $\text{DMSO-d}_6$ ) spectrum of 1-(2-methoxyphenyl)-4,5-diphenyl-1*H*-1,2,3-triazole (**3ge**).

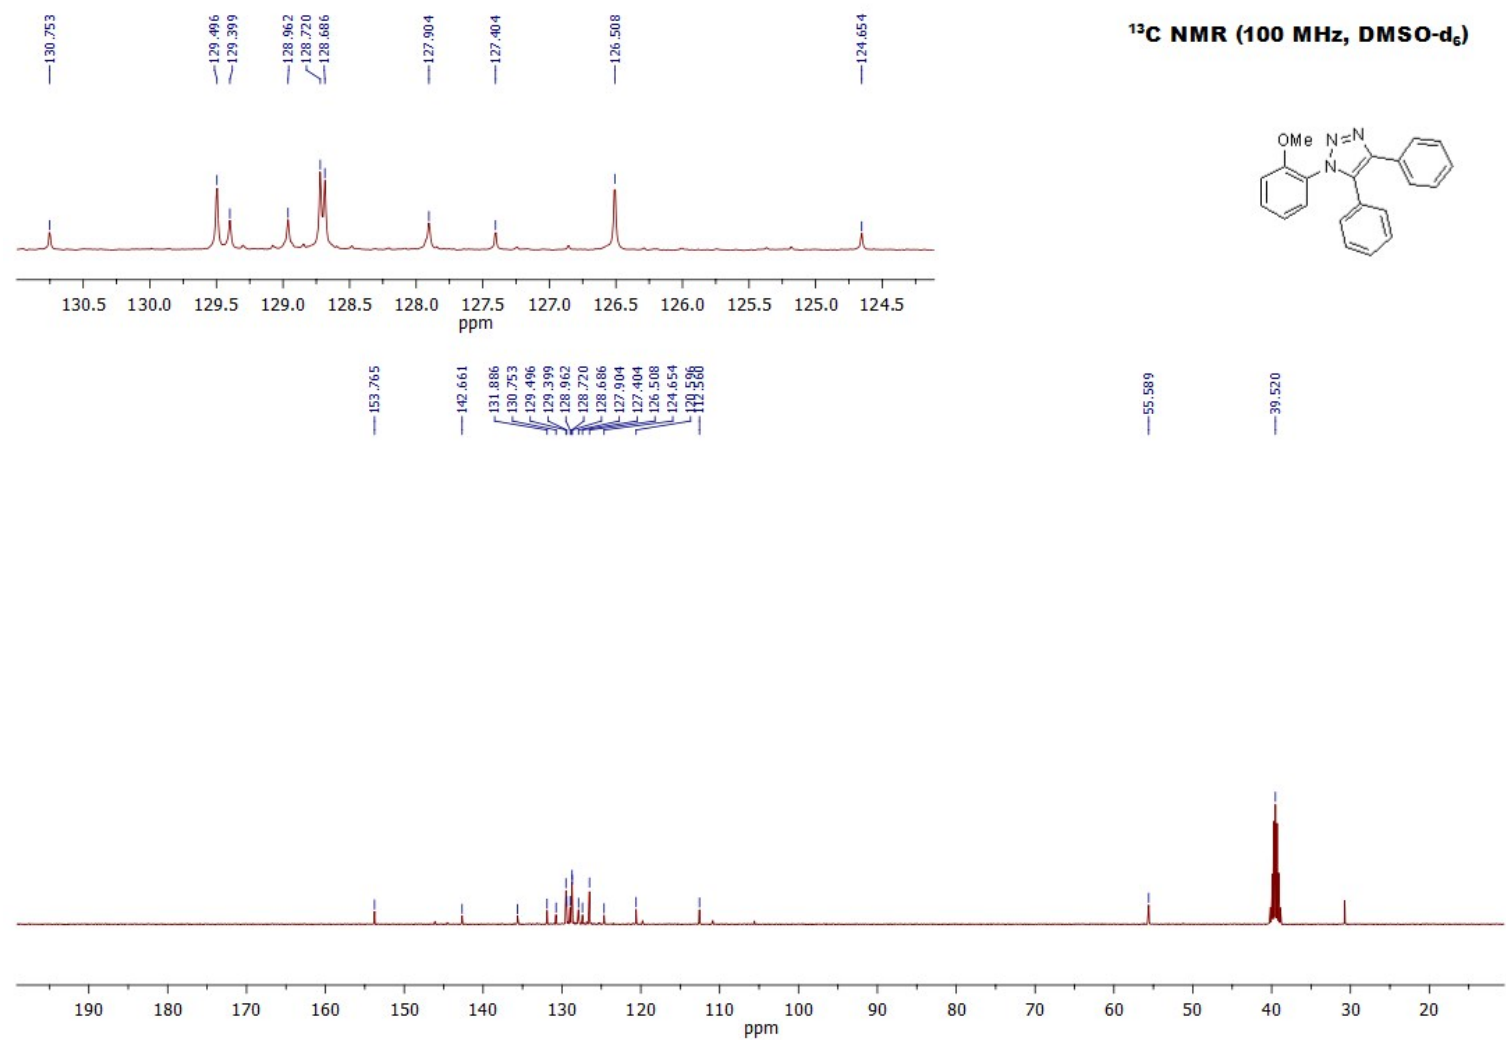

$^1\text{H}$  NMR (400 MHz,  $\text{DMSO-d}_6$ ) spectrum of 4,5-diphenyl-1-(o-tolyl)-1*H*-1,2,3-triazole(**3ee**).

$^1\text{H}$  NMR (400 MHz,  $\text{DMSO-d}_6$ )

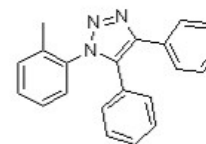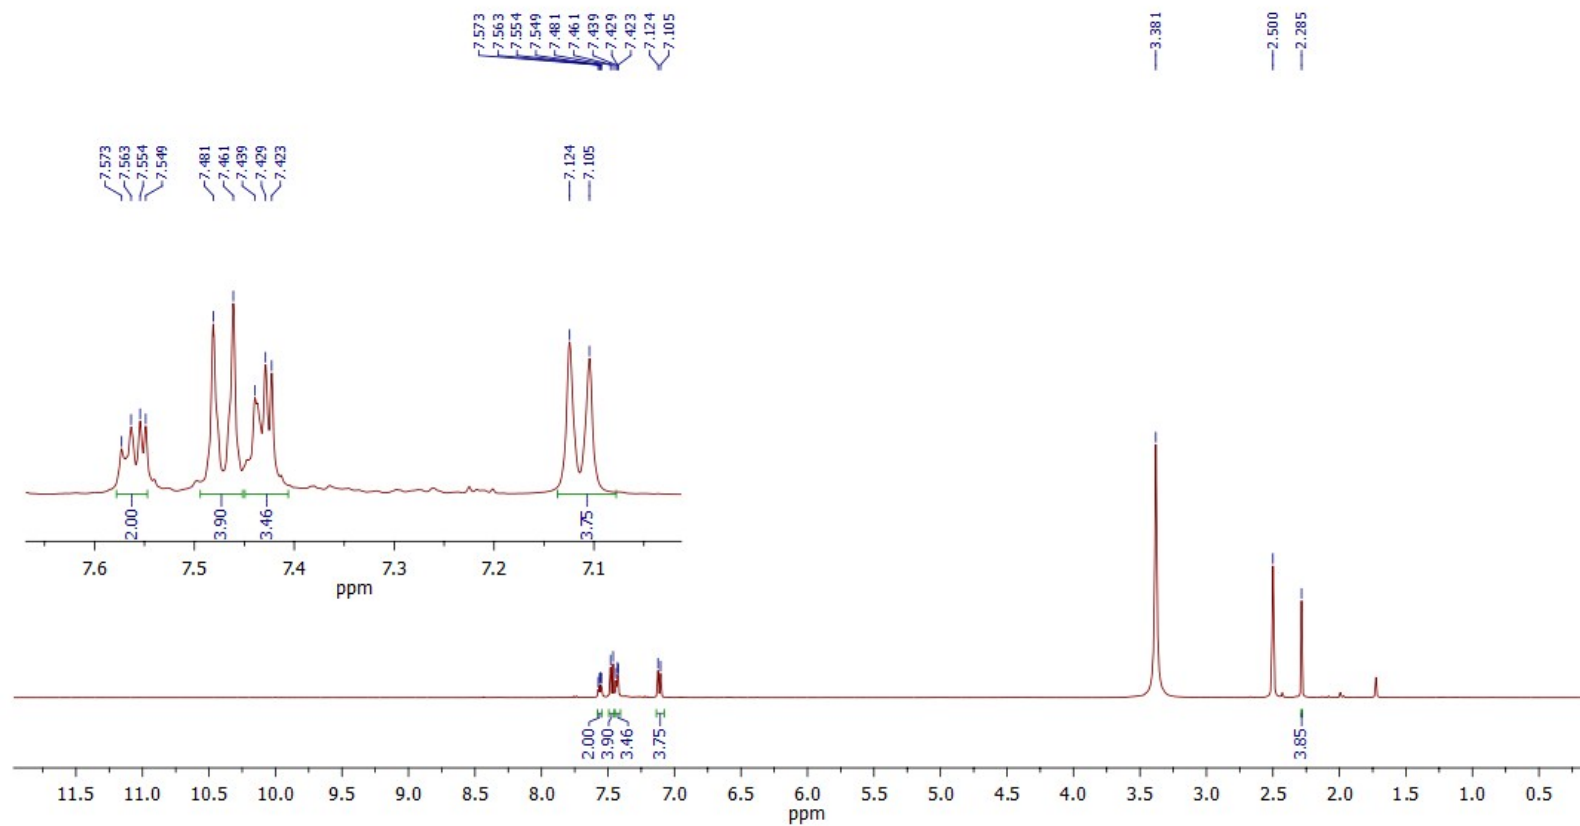

$^{13}\text{C}$ NMR (100 MHz,  $\text{DMSO-d}_6$ ) spectrum of 4,5-diphenyl-1-(o-tolyl)-1H-1,2,3-triazole (**3ee**).

$^{13}\text{C}$  NMR (100 MHz,  $\text{DMSO-d}_6$ )

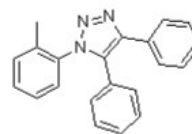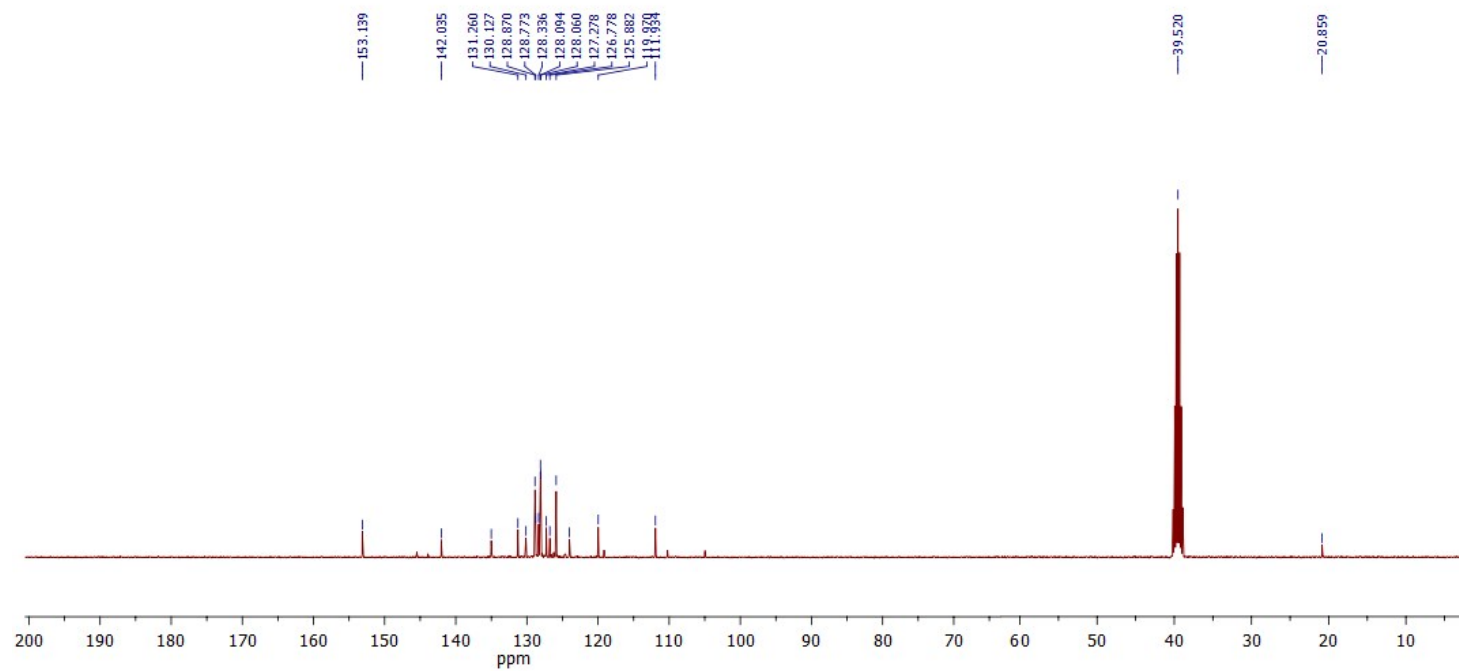

$^1\text{H}$  NMR (400 MHz,  $\text{DMSO-d}_6$ ) spectrum of 1-(4-nitrophenyl)-1*H*-1,2,3-triazole-4,5-dicarboxylic acid (**3af**).

$^1\text{H}$  NMR (400 MHz,  $\text{DMSO-d}_6$ )

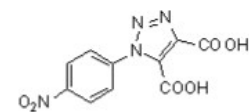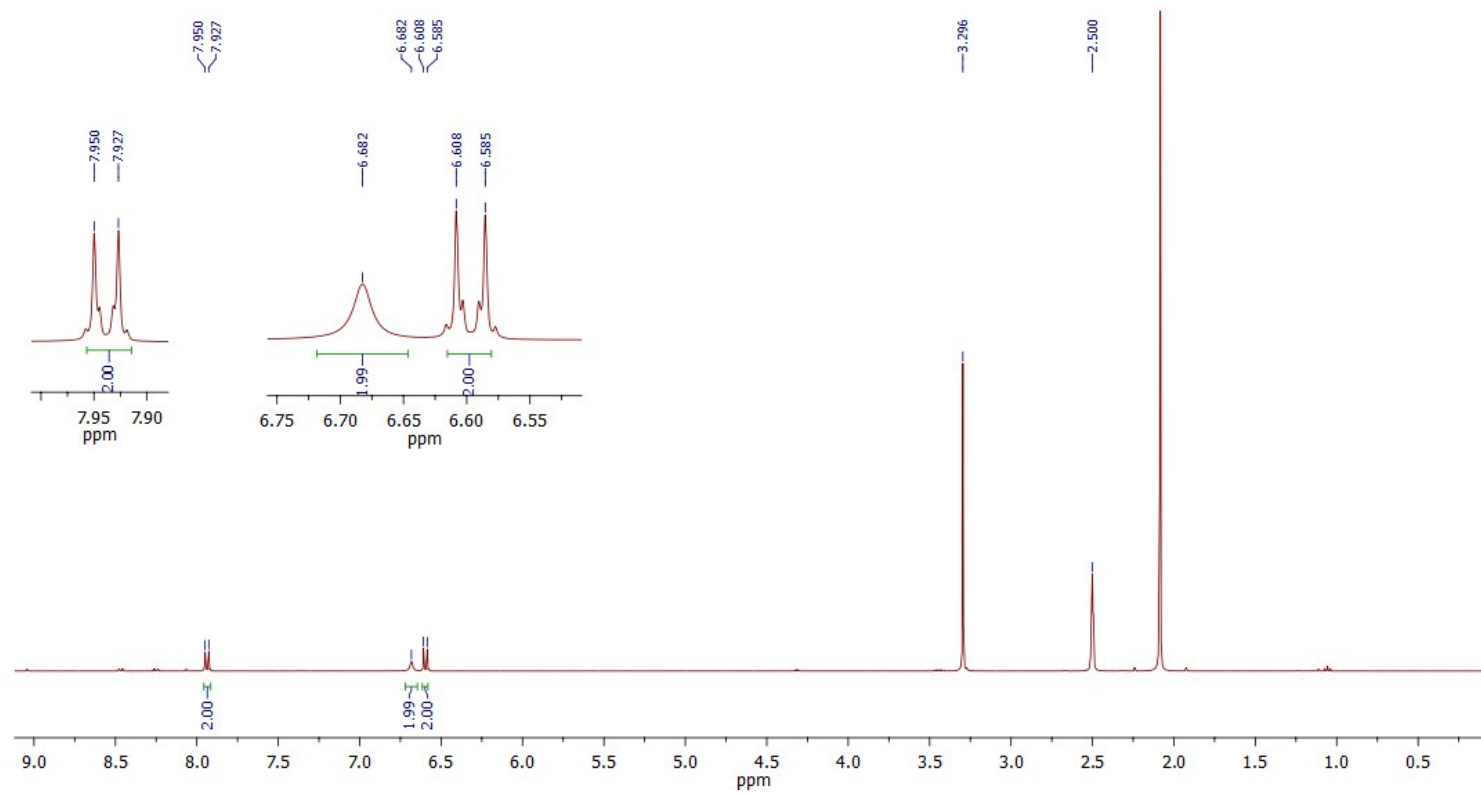

$^{13}\text{C}$  NMR (100 MHz, DMSO- $\text{d}_6$ ) spectrum of 1-(4-nitrophenyl)-*1H*-1,2,3-triazole-4,5-dicarboxylic acid (**3af**).

$^{13}\text{C}$  NMR (100 MHz, DMSO- $\text{d}_6$ )

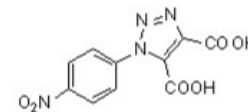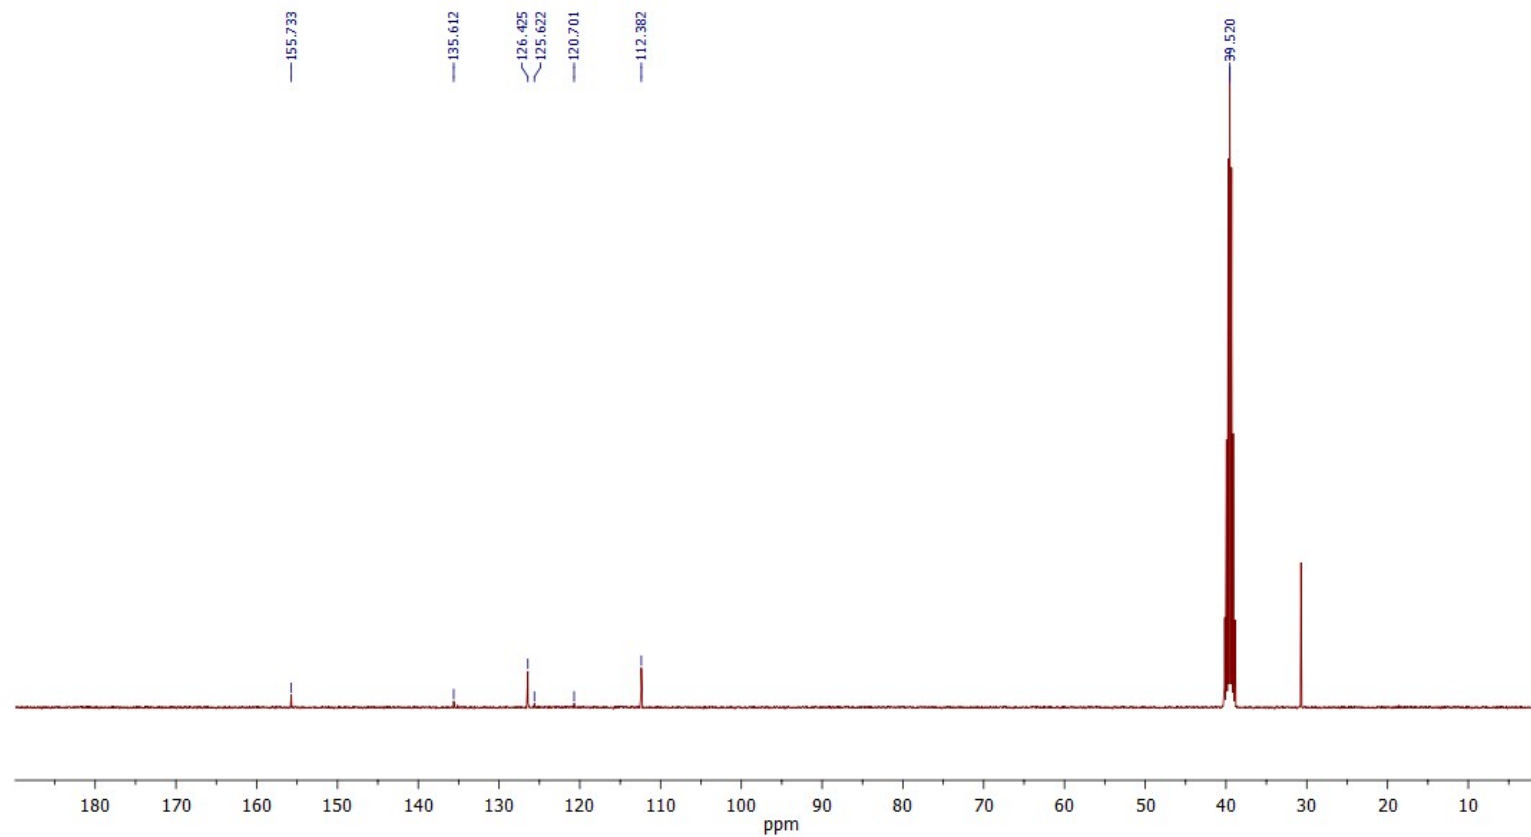



$^1\text{H}$  NMR (400 MHz,  $\text{DMSO-d}_6$ ) spectrum of 1,5-diphenyl-4-(trimethylsilyl)-1*H*-1,2,3-triazole (**3ng**).

$^1\text{H}$  NMR (400 MHz,  $\text{DMSO-d}_6$ )

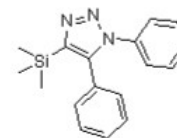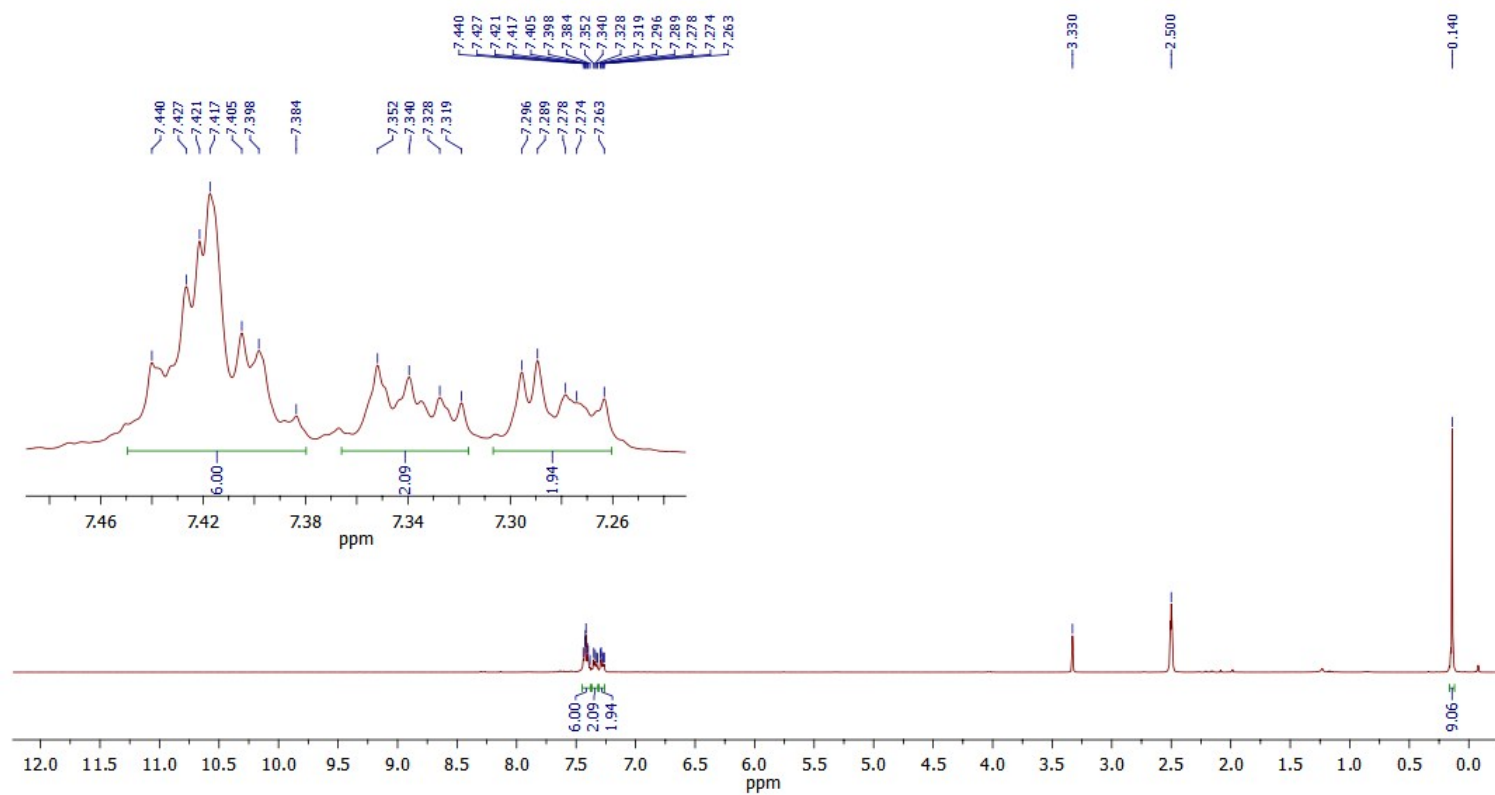

$^{13}\text{C}$  NMR (100 MHz,  $\text{DMSO-d}_6$ ) spectrum of 1,5-diphenyl-4-(trimethylsilyl)-1*H*-1,2,3-triazole (**3ng**).

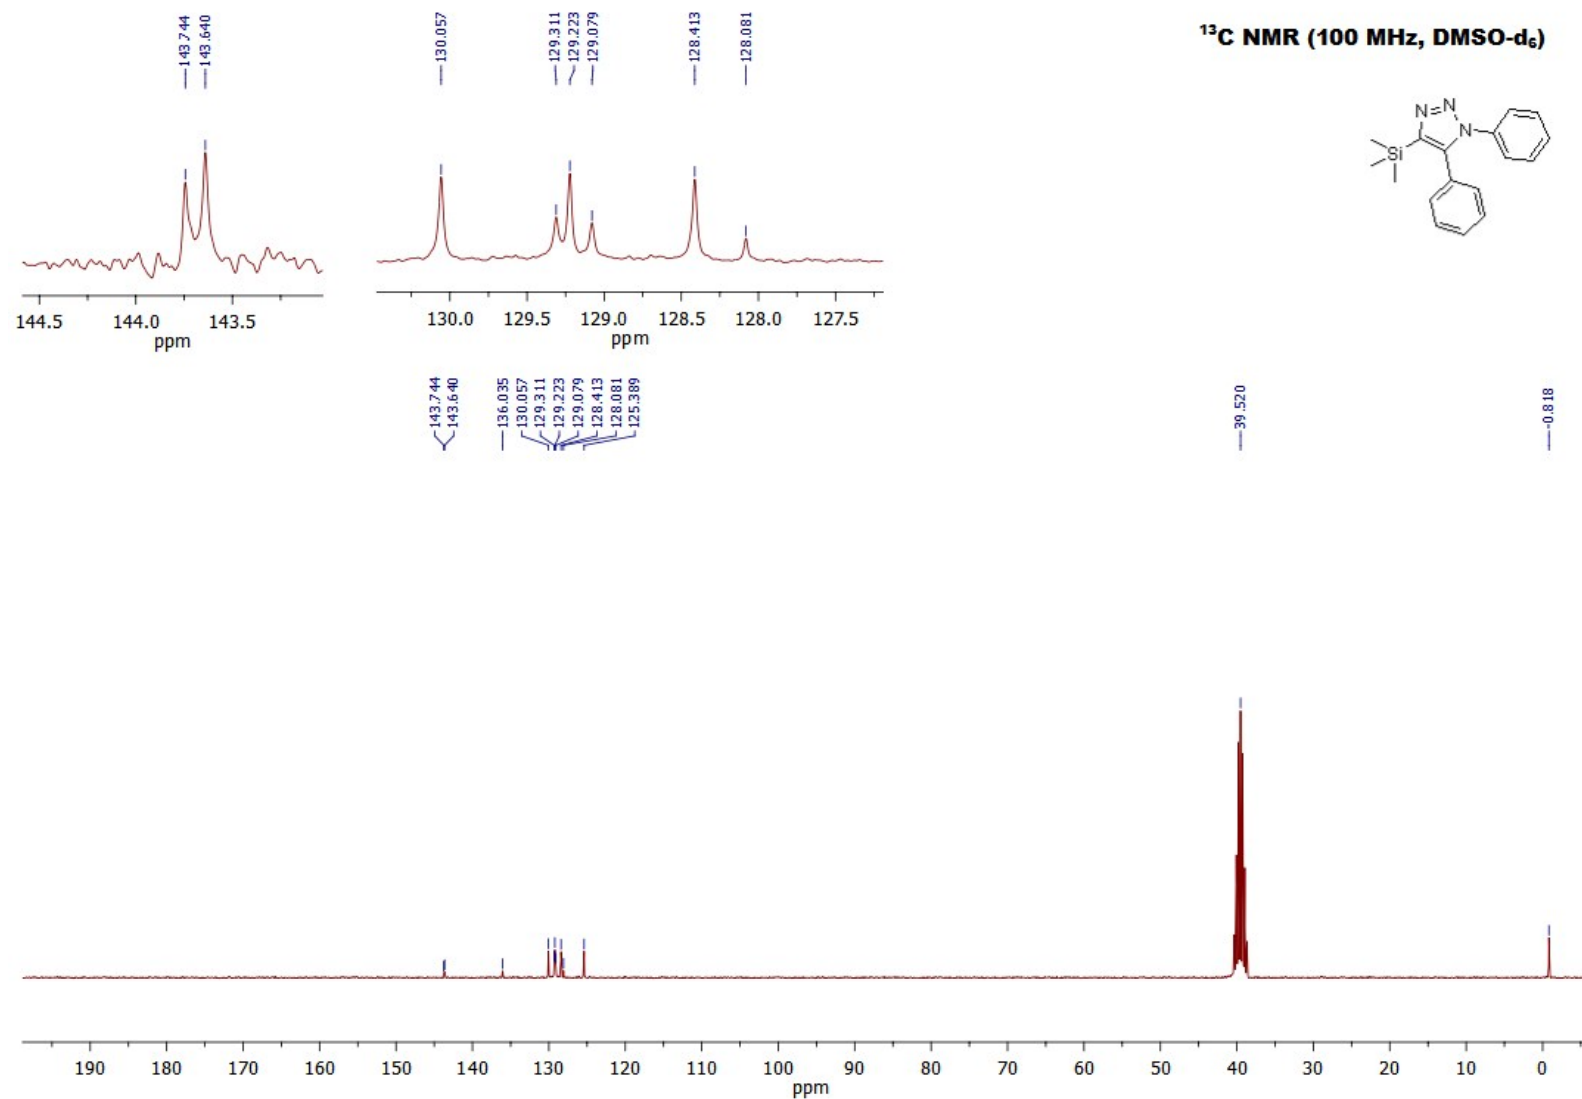

$^1\text{H}$  NMR (400 MHz,  $\text{CDCl}_3$ ) spectrum of 1-(4-nitrophenyl)-5-phenyl-4-(triisopropylsilyl)-1*H*-1,2,3-triazole (**3ah**).

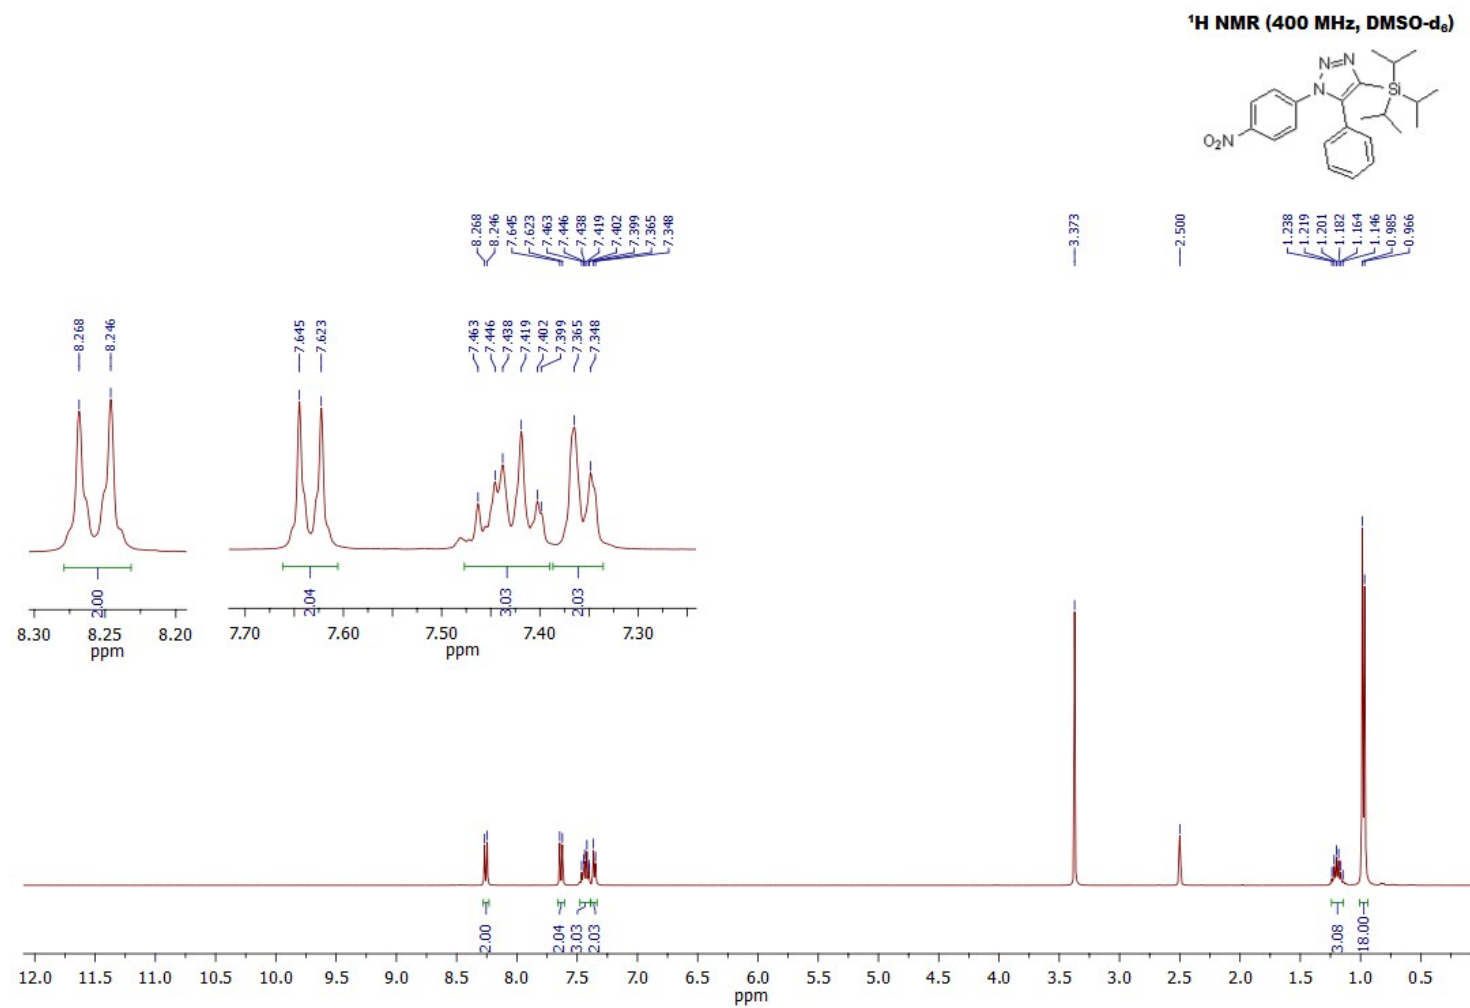

$^{13}\text{C}$  NMR (100 MHz,  $\text{CDCl}_3$ ) spectrum of 1-(4-nitrophenyl)-5-phenyl-4-(triisopropylsilyl)-1*H*-1,2,3-triazole (**3ah**).

$^{13}\text{C}$  NMR (100 MHz,  $\text{DMSO-d}_6$ )

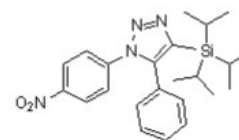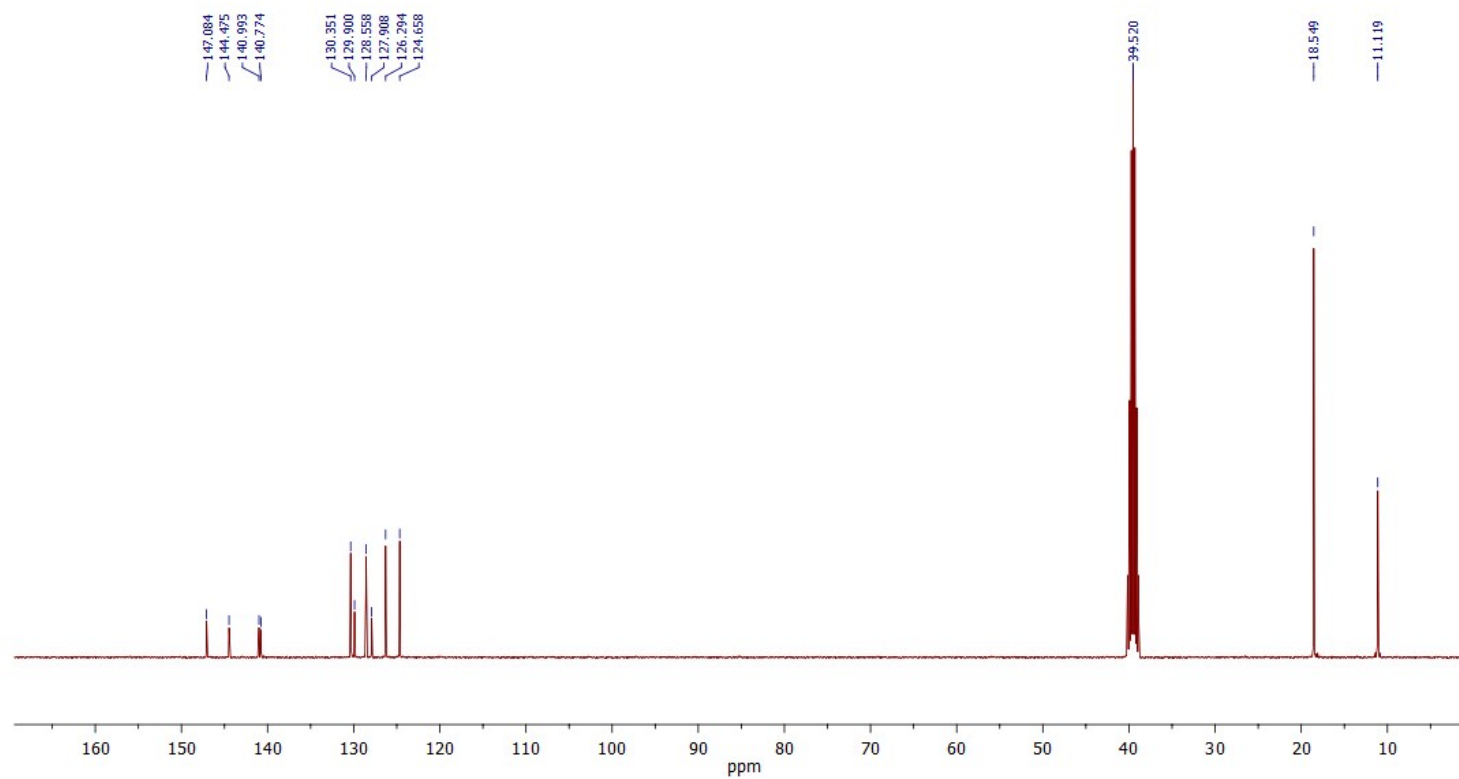

$^1\text{H}$  NMR (400 MHz,  $\text{DMSO-d}_6$ ) spectrum of 5-phenyl-1-(p-tolyl)-4-(triisopropylsilyl)-1*H*-1,2,3-triazole (**3dh**).

$^1\text{H}$  NMR (400 MHz,  $\text{DMSO-d}_6$ )

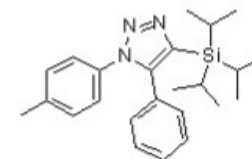

1.231  
1.212  
1.193  
1.174  
1.156  
0.989  
0.970

2.500  
2.284

3.303

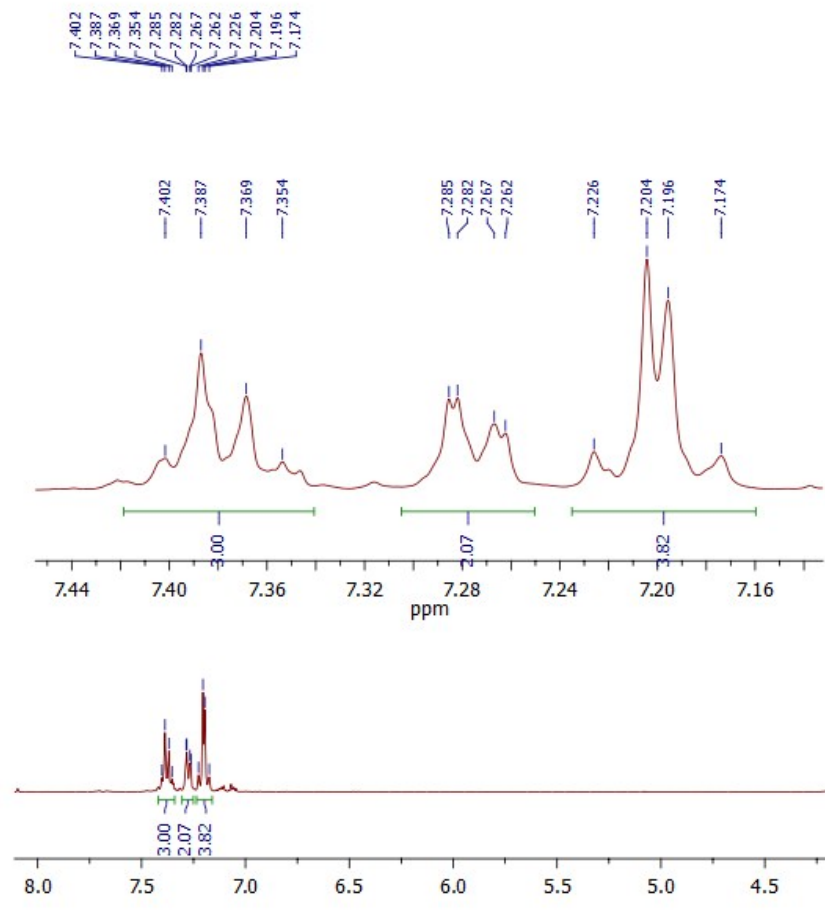

$^{13}\text{C}$  NMR (100 MHz,  $\text{DMSO-d}_6$ ) spectrum of 5-phenyl-1-(p-tolyl)-4-(triisopropylsilyl)-1*H*-1,2,3-triazole (**3dh**).

$^{13}\text{C}$  NMR (100 MHz,  $\text{DMSO-d}_6$ )

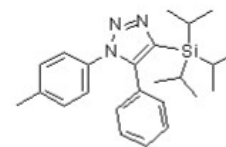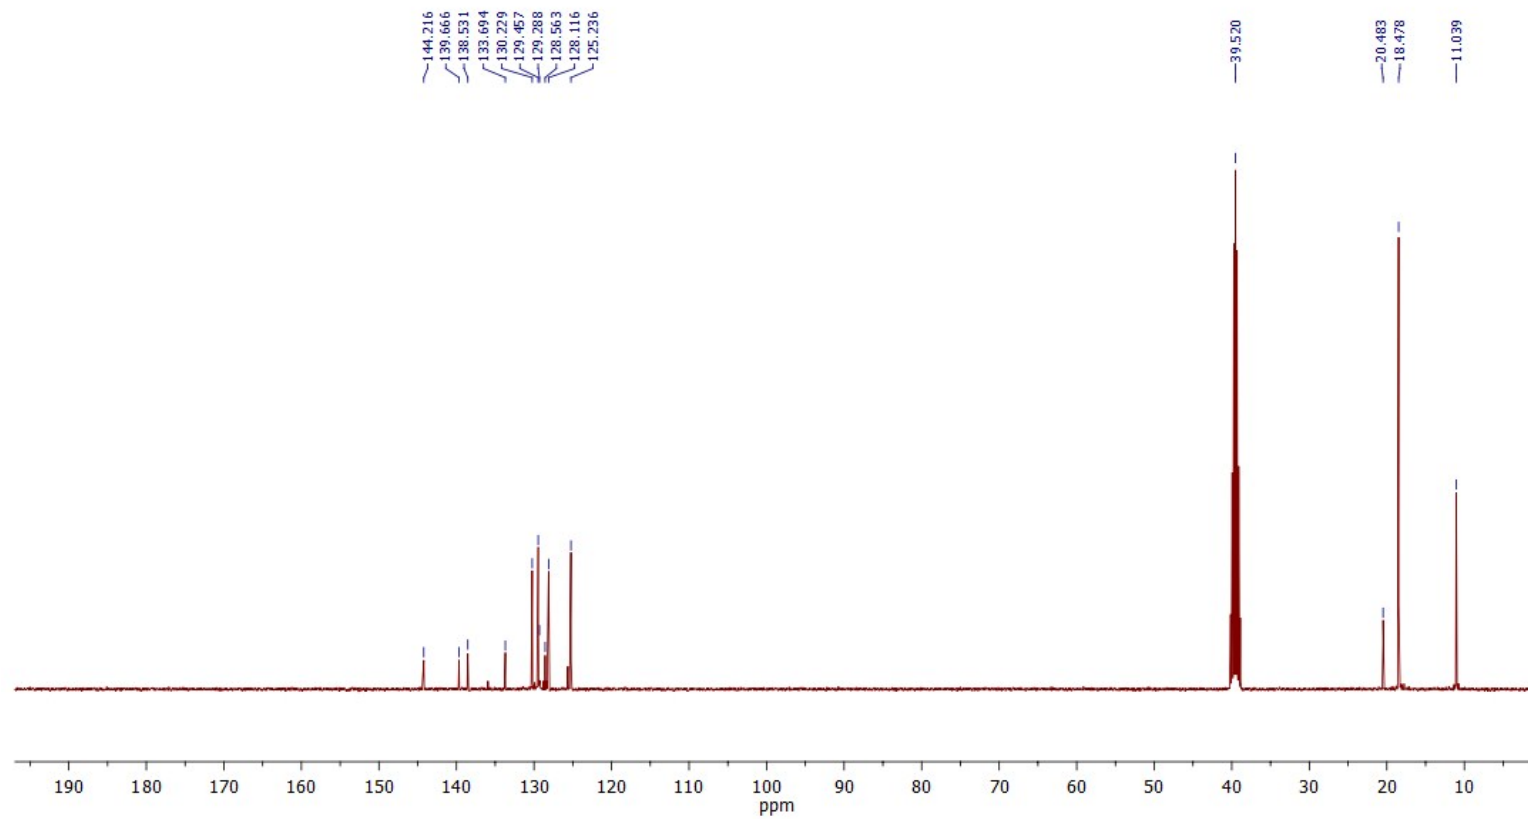

$^1\text{H}$  NMR (400 MHz,  $\text{DMSO-d}_6$ ) spectrum of 1,5-diphenyl-4-(triisopropylsilyl)-1*H*-1,2,3-triazole (**3nh**).

$^1\text{H}$  NMR (400 MHz,  $\text{DMSO-d}_6$ )

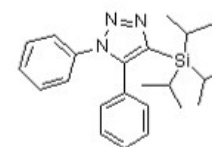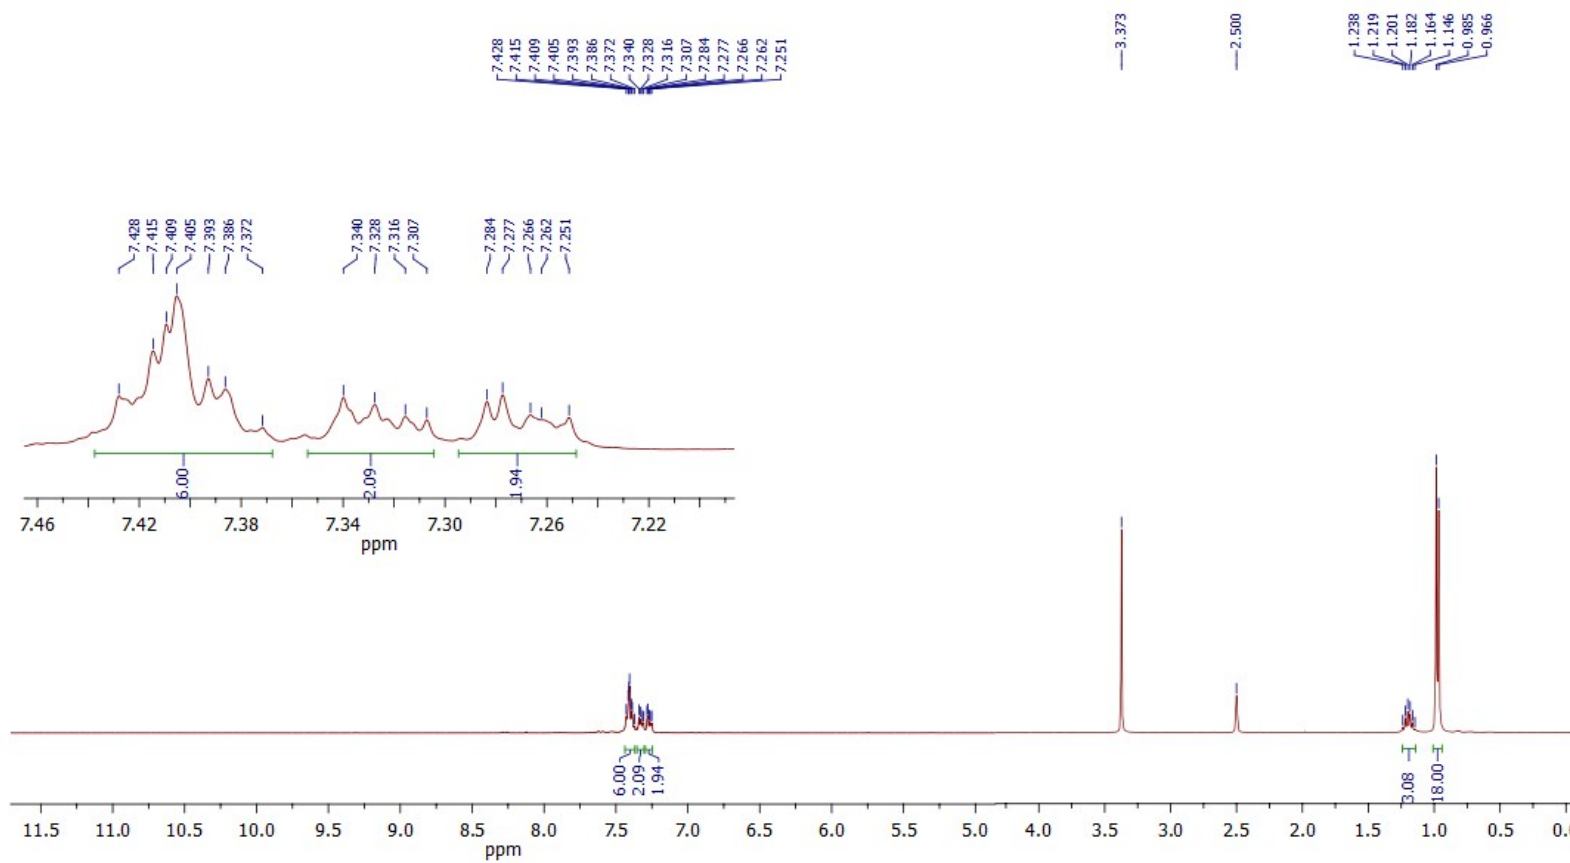

$^{13}\text{C}$  NMR (100 MHz,  $\text{DMSO-d}_6$ ) spectrum of 1,5-diphenyl-4-(triisopropylsilyl)-1*H*-1,2,3-triazole (**3nh**).

$^{13}\text{C}$  NMR (100 MHz,  $\text{DMSO-d}_6$ )

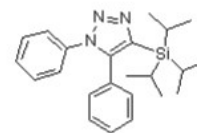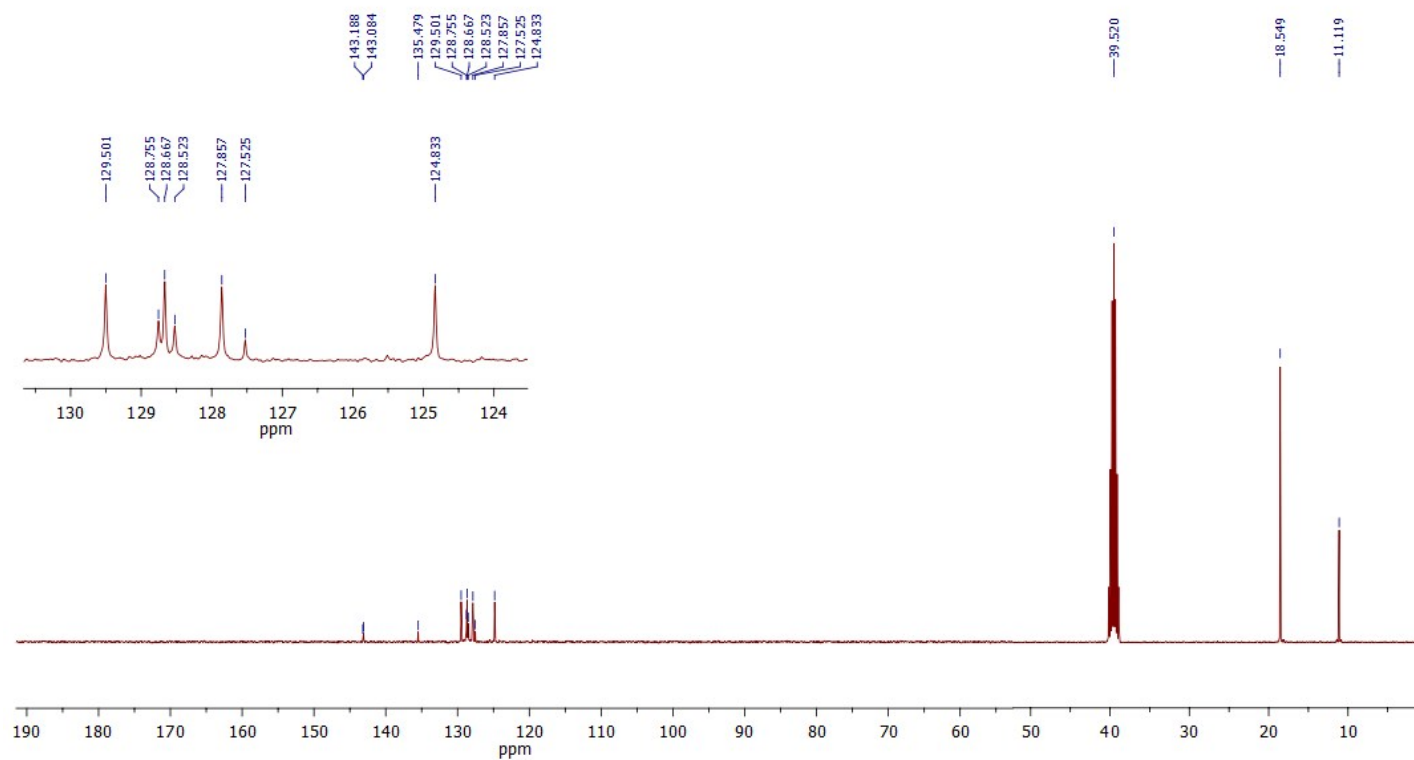



$^1\text{H}$  NMR (400 MHz,  $\text{DMSO-d}_6$ ) spectrum of 1-methyl-3-(1-(4-nitrophenyl)-4-(trimethylsilyl)-1*H*-1,2,3-triazol-5-yl)-1*H*-indole (**3ai**).

$^1\text{H}$  NMR (400 MHz,  $\text{DMSO-d}_6$ )

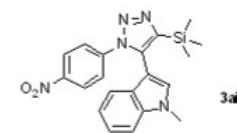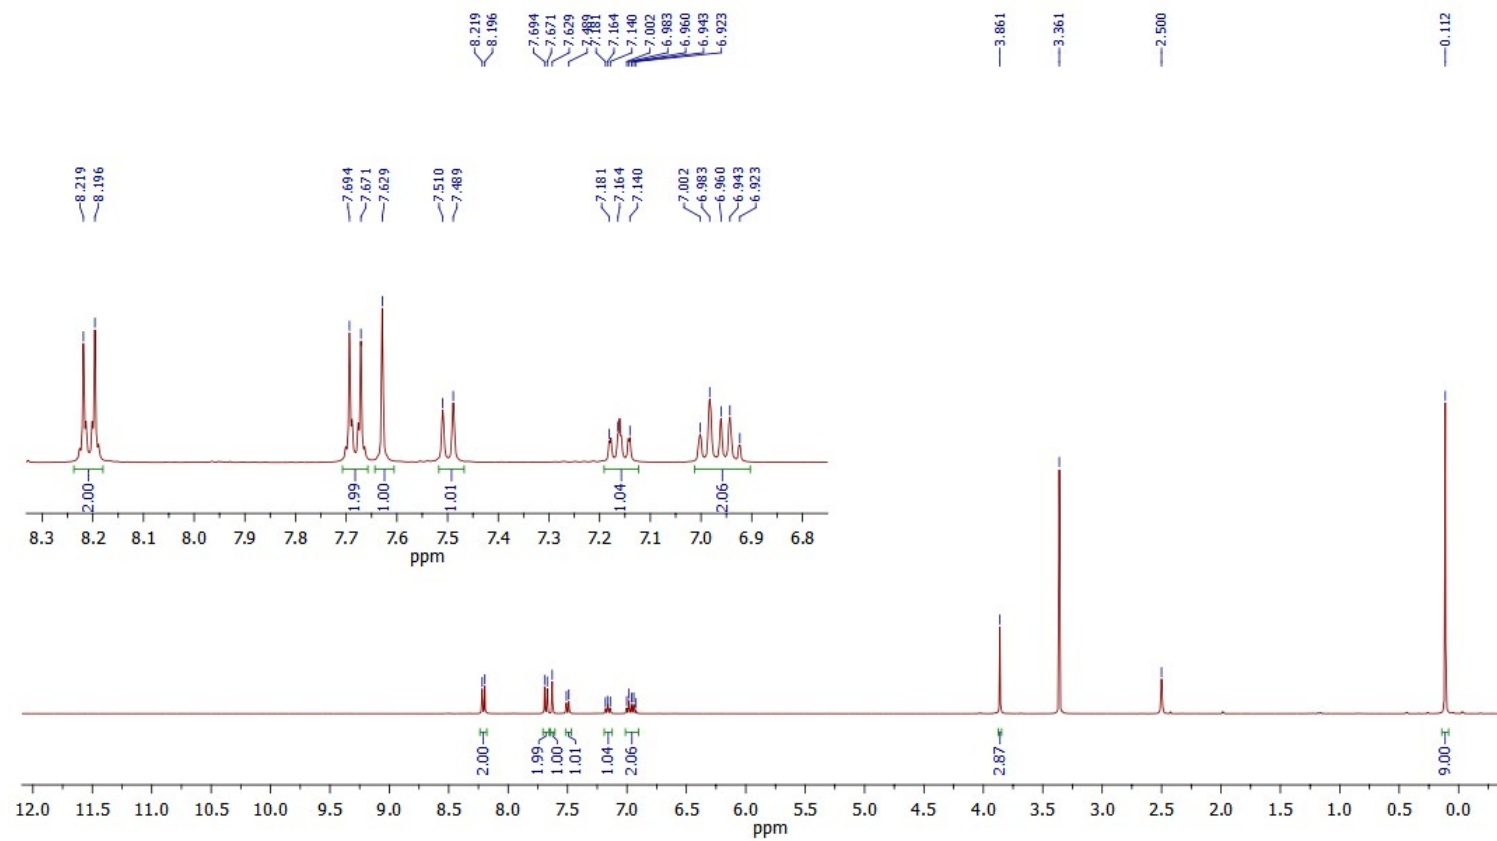

$^{13}\text{C}$  NMR (100 MHz,  $\text{DMSO-d}_6$ ) spectrum of 1-methyl-3-(1-(4-nitrophenyl)-4-(trimethylsilyl)-1*H*-1,2,3-triazol-5-yl)-indole (**3ai**).

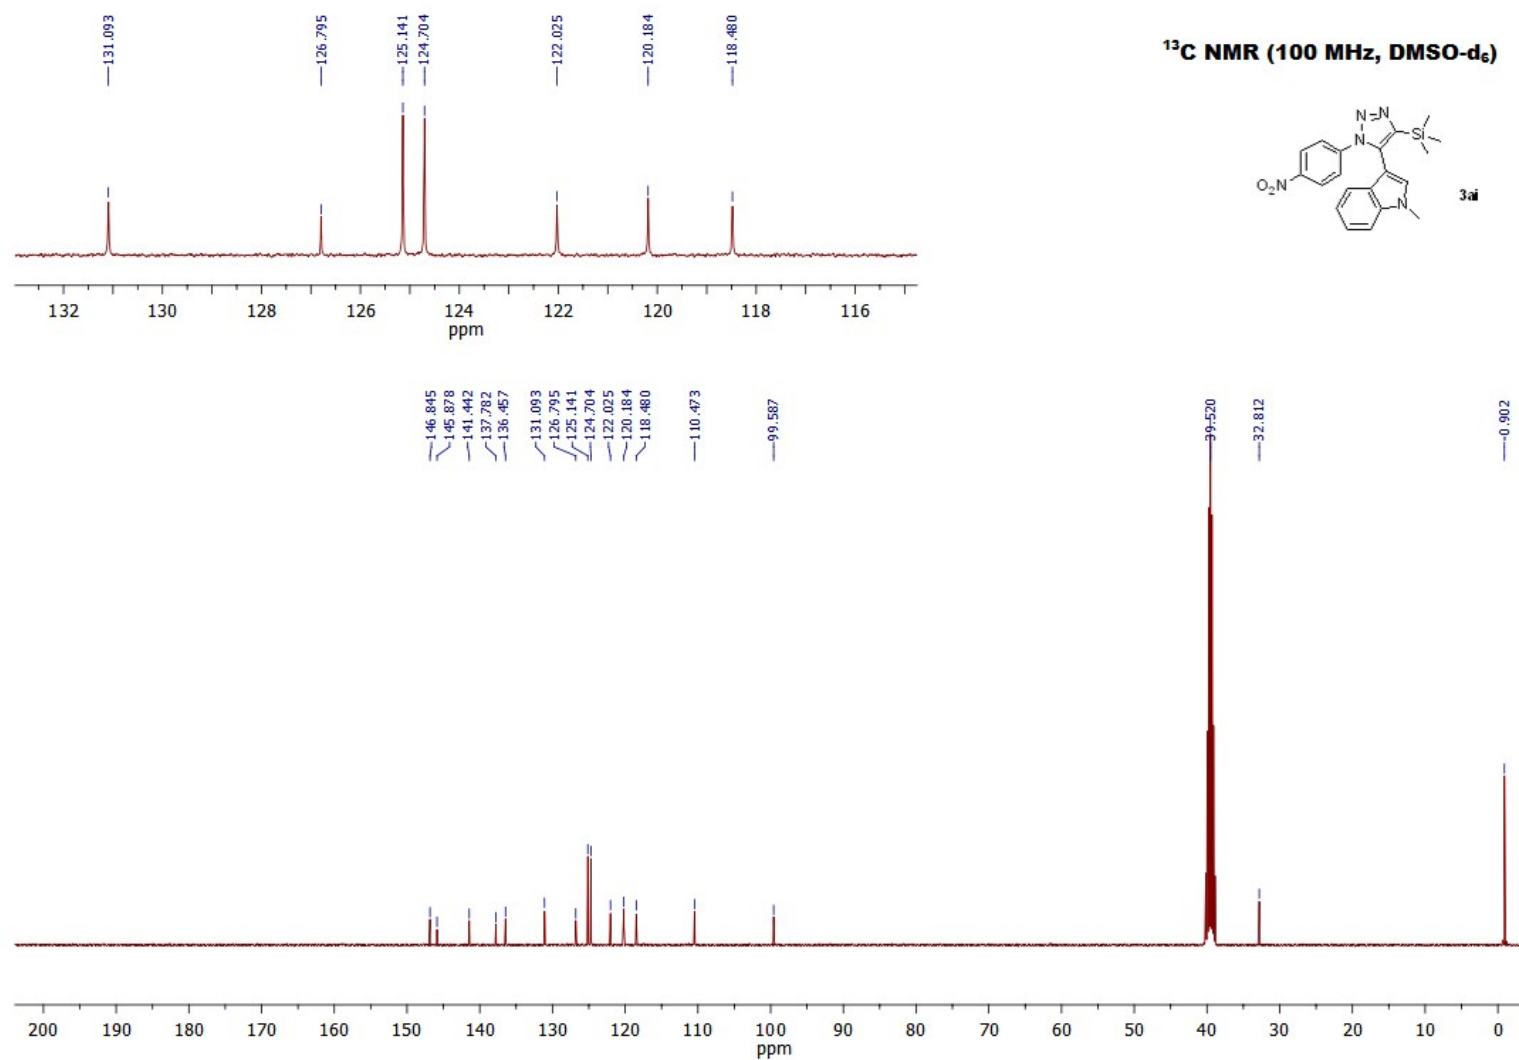

$^1\text{H}$  NMR (400 MHz,  $\text{DMSO-d}_6$ ) spectrum of 5-butyl-1-(4-nitrophenyl)-4-(triisopropylsilyl)-1*H*-1,2,3-triazole(**3aj**).

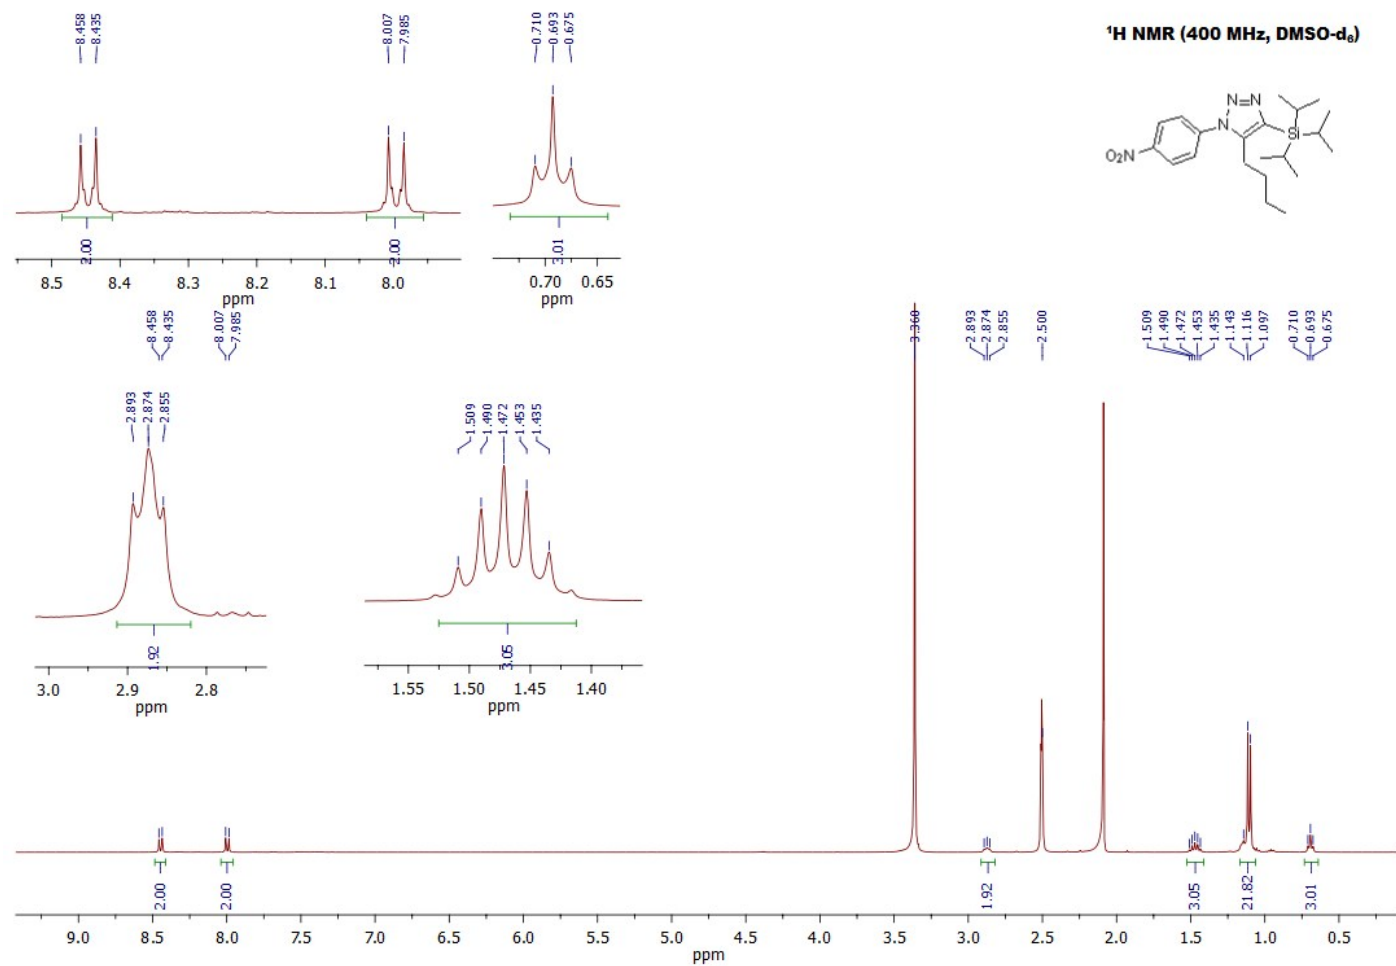

<sup>13</sup>C NMR (100 MHz, DMSO-d<sub>6</sub>) spectrum of 5-butyl-1-(4-nitrophenyl)-4-(triisopropylsilyl)-1*H*-1,2,3-triazole(**3aj**).

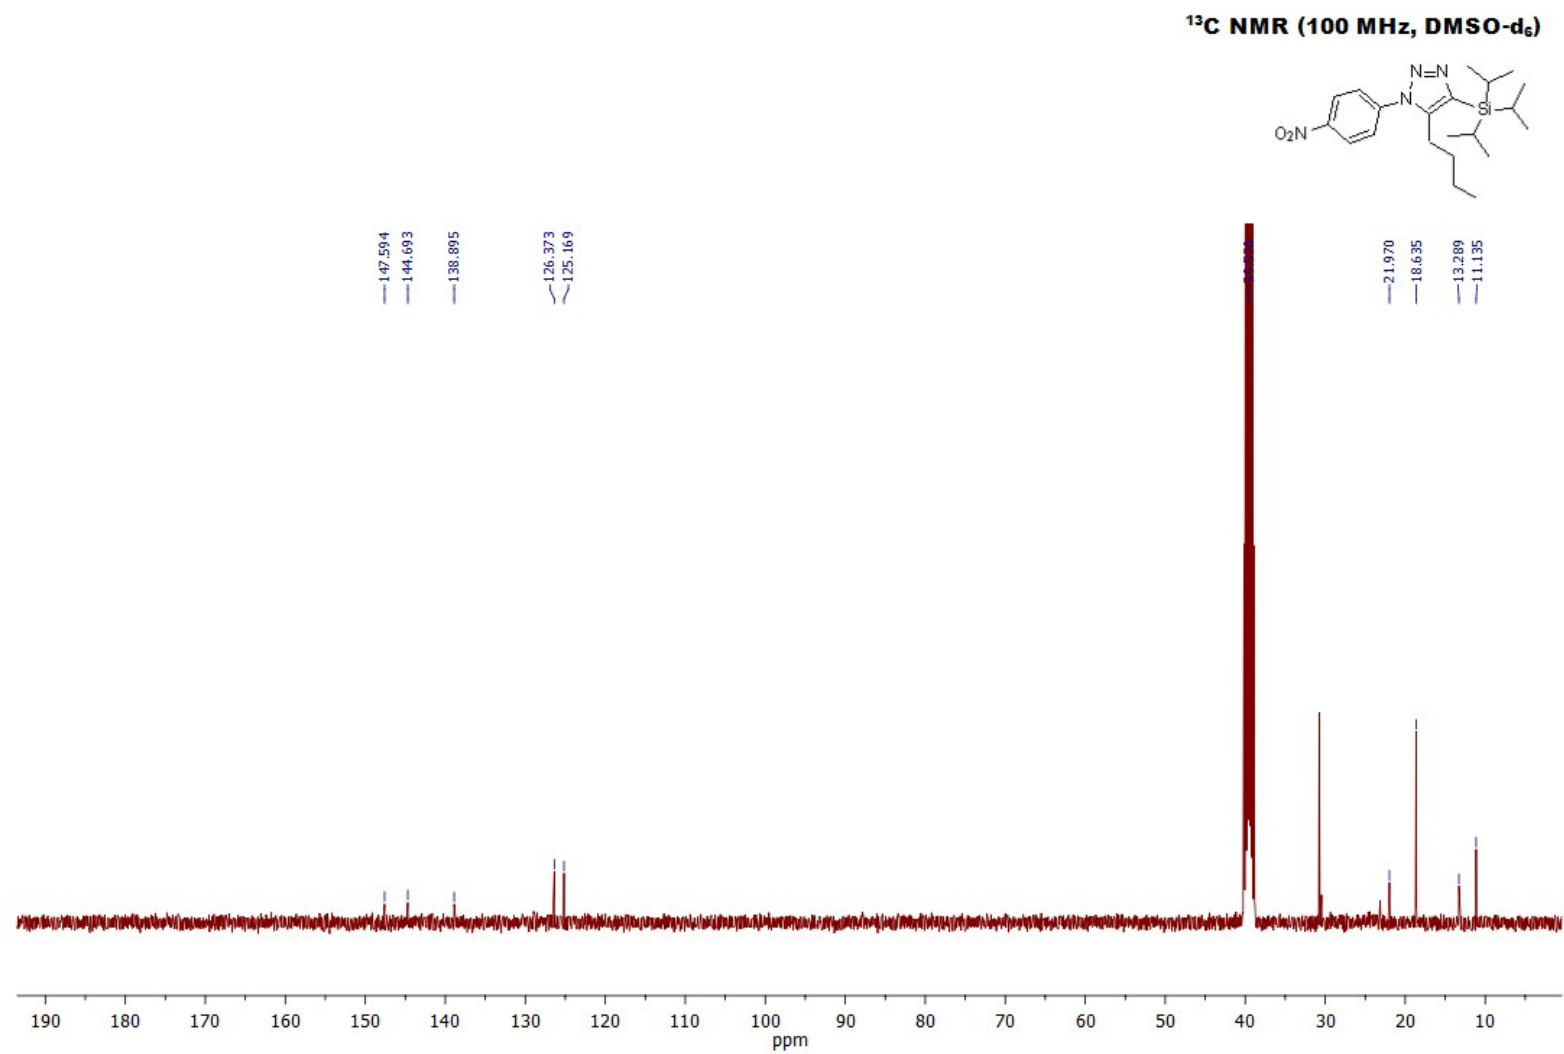

## References

1. H. Sugita, Y. Hatanaka, T. Hiyama *Tetrahedron Lett.* **1995**, 16, 2769
2. J. L. García-Ruano, J. A. Leyre-Marzo, C. Alvarado, M. Tortosa, S. Díaz-Tendero, A. Fraile. *Eur. J. Org. Chem.* **2012**, 27, 8414
3. K. J. Thorley, J. M. Hales, H. Kim, S. Ohira, J.-L. Bredas, J. W. Perry, H. L. Anderson *Eur. J. Org. Chem.* **2013** 31, 10370
4. V. D. Filimonov, M. E. Trusova, P. S. Postnikov, E. A. Krasnokutskaya, Y. M. Lee, H. Y. Hwang, H. Kim, K.-W. Chi *Org. Lett.* **2008**, 18, 3961
5. K. V. Kutonova, M. E. Trusova, P. Postnikov, V. D. Filimonov, J. Parello, *Synthesis* **2013**, 19, 2706
6. X. Xu. Meng, T. Gao, B. Chen. *Eur. J. Org. Chem.* **2010**, 28, 5409
7. C. Zhengkai, Y. Qiangqiang, L. Zhanxiang, Z. Yuhong. *Chem. Eur. J.* **2014**, 20, 1
8. H.-W. Bai, Z.-J. Cai, S.-Y. Wang, S.-J. Ji. *Org. Lett.* **2015**, 12, 2898
9. F. Xie, K. Sivakumar, Q. Zeng, M. A. Bruckman, B. Hodges, Q. Wang. *Tetrahedron* **2008**, 13, 2906
10. H. C. Bertrand, M. Schaap, L. Baird, N. D. Georgakopoulos, A. Fowkes, C. Thiollier, H. Kachi, A. T. Dinkova-Kostova, G. Wells. *J. Med. Chem.* **2015**, 18, 7186
11. N. Boechat, V. F. Ferreira, S. B. Ferreira, M. Lourdes, G. Ferreira, F. C. Silva, M. Bastos, M. S. Costa, M. S. Lourenco, A. C. Pinto, A. U. Krettli, A. C. Aguiar, B. M. Teixeira, N. V. Silva, P. C. Martins, F. M. Bezerra, A. S. Camilo, Gerson P. Silva, C. P. Costa *J. Med. Chem.* **2011**, 54, 5988
12. X. Tian, F. Yang, D. Rasina, M. Bauer, S. Warratz, F. Ferlin, L. Vaccaro, L. Ackermann. *Chem. Commun.* **2016**, 52, 9777
13. J. Dietmar, R. Wolf-Dieter, A. Manfred. *Zeitschrift fuer Chemie* **1985**, 25, 363
14. Bruker (2015). APEX3, SAINT. Bruker AXS Inc., Madison, Wisconsin, USA.
15. L. Palatinus, G. Chapuis *J. Appl. Cryst.* **2007**, 40, 786
16. P. W. Betteridge, J. R. Carruthers, R.I. Cooper, K. Prout, D.J. Watkin, J. *Appl. Cryst.* **2003**, 36, 1487.
17. J. Rohlíček, M. Husák, *J. Appl. Cryst.* **2007**, 40, 600
